# Supplementary material
Source: Royal Society of Chemistry journal article supplement (doi:10.1039/d6cc00868b)

## Supplementary information

for

# Desaturative arylaldehyde synthesis by synergistic carbocatalysis and organocatalysis

Naokatsu Kannari<sup>a, b\*</sup>, Ivan Curic<sup>b</sup>, Nina Place<sup>b</sup>, Lukas Enders<sup>b</sup>, Shotaro Kawasaki<sup>a</sup>, Anna Lenarda<sup>b\*</sup> and Juho Helaja<sup>b\*</sup>

- a) *Division of Environmental Engineering Science, Graduate School of Science and Technology, Gunma University, 1-5-1, Tenjin-cho, Kiryu, Gunma 376-8515, Japan.*  
b) *Department of Chemistry, University of Helsinki, A. I. Virtasen aukio 1, P.O. Box 55, 000014, Helsinki (Finland).*

Corresponding authors:

Juho Helaja: juho.helaja@helsinki.fi

Naokatsu Kannari: nkannari@gunma-u.ac.jp

Anna Lenarda: anna.lenarda@helsinki.fi

## Contents

|                                                                          |     |
|--------------------------------------------------------------------------|-----|
| Preparation of oxidized activated carbon materials.....                  | S2  |
| XPS analysis.....                                                        | S2  |
| TPD measurements.....                                                    | S4  |
| Optimization of reaction conditions .....                                | S5  |
| Chemical blocking of functional groups.....                              | S5  |
| Catalytic tests.....                                                     | S7  |
| General method .....                                                     | S7  |
| Recycling test .....                                                     | S8  |
| BET and pore volume analysis of fresh and used oAC <sub>HNO3</sub> ..... | S9  |
| Pore blocking tests.....                                                 | S10 |
| Reaction with reduced graphene oxide .....                               | S11 |
| Effect of radical inhibitor and catalyst regeneration .....              | S12 |
| Synthesis of starting materials.....                                     | S13 |
| Synthesis of aryl aldehydes (2c-i) .....                                 | S23 |
| Computational supplementary information.....                             | S27 |
| Frontier molecular orbitals of van der Waals complexes .....             | S32 |
| NCI plots.....                                                           | S34 |
| SET and HAT study .....                                                  | S35 |
| References .....                                                         | S36 |
| Copies of NMR spectra .....                                              | S38 |

## General remarks

If not described differently, all reactions were performed under air and at RT (18 - 20 °C). Reactions sensitive to water or oxygen were kept under an inert atmosphere of dry argon, handling them with Schlenk-technique with syringe and septum in absolute and degassed solvents dried on 3Å molecular sieves prior use. All HPLC-grade solvents were used without further purification as obtained from the supplier (Honeywell, VWR, Merck, Sigma Aldrich). Distilled water was produced with an Aquatron AS4 (Bibby). All commercially available reagents were used without further purification as obtained from the supplier. Column chromatography was executed with pressurized air and at RT over silica gel (pore size 40 - 63 µm, VWR). All NMR spectra were measured at a sample temperature of 293 K. The following devices were used: Avance Neo 500 (Bruker, 500 MHz), Avance Neo 400 (Bruker, 400 Mhz). The chemical shift  $\delta$  in parts per million (ppm) is relative to the shift of tetramethylsilane ( $\delta = 0$  ppm) in both  $^1\text{H}$  and  $^{13}\text{C}$  NMR spectra. The spectra were calibrated to the residual proton or carbon shifts of the corresponding deuterated solvents ( $^1\text{H}$ -NMR:  $\text{CDCl}_3$  7.26 ppm,  $\text{DMSO-}d_6$ : 2.50,  $^{13}\text{C}$ -NMR:  $\text{CDCl}_3$  77.16 ppm,  $\text{DMSO-}d_6$ : 39.52). NMR yields were determined with 1,3,5-trimethoxybenzene as an internal standard using a pulse-width of  $\text{pw} = 3.33 \mu\text{s}$  and a relaxation delay of  $\text{d1} = 35 \text{ s}$ . High-resolution mass spectra (HRMS) were obtained using a JEOL MStation JMS-700 (EI) instrument.

## Preparation of oxidized activated carbon materials

Activated carbon (AC, DARCO ~100 mesh particle size, powder) was oxidized with concentrated  $\text{HNO}_3$  according to a previously reported procedure.<sup>1</sup> To remove residual metal impurities, AC was first washed with 12 M HCl to obtain demetallized AC ( $\text{AC}_{\text{dm}}$ ). Then,  $\text{AC}_{\text{dm}}$  was then added to the concentrated  $\text{HNO}_3$ , and the mixture was stirred for 140 °C for 3 h. Subsequently, the mixture was dried in vacuum at 140 °C for 6 h. The oxidized AC was denoted as  $\text{oAC}_{\text{HNO}_3}$ .

To prepare reference materials with reduced oxygen functionalities,  $\text{AC}_{\text{dm}}$  and  $\text{oAC}_{\text{HNO}_3}$  were further heat-treated at 1000 °C under a  $\text{N}_2$  stream without holding the temperature to obtain  $\text{HT-AC}_{\text{dm}}$  and  $\text{HT-oAC}_{\text{HNO}_3}$ , respectively.

## XPS analysis

The surface composition and chemical states of the carbon samples were evaluated by X-ray photoelectron spectroscopy (XPS; Kratos AXIS NOVA, Shimadzu Corp.) using Al  $\text{K}\alpha$  radiation (15 kV, 10 mA). The samples were fixed to an aluminum plate with conductive carbon tape. The charge-up shift correction of the binding energy was performed using the C1s binding energy at 284.5 eV. The O1s spectra were deconvoluted into the five peaks according to reported procedure.<sup>2</sup>

**Table S1** XPS analysis of AC and  $\text{oAC}_{\text{HNO}_3}$ : Atomic concentrations (%)

| Sample                      | Atomic concentration (%) |      | O/C   |
|-----------------------------|--------------------------|------|-------|
|                             | C                        | O    |       |
| AC                          | 93.1                     | 6.9  | 0.074 |
| $\text{oAC}_{\text{HNO}_3}$ | 82.2                     | 17.8 | 0.217 |

**Table S2** XPS analysis of AC and oAC<sub>HNO3</sub>: summary of O1s deconvolutions.

| Sample              | Ratio (%)    |              |                           |              |                  |
|---------------------|--------------|--------------|---------------------------|--------------|------------------|
|                     | C=O          | C-OH         | C-O esters,<br>anhydrides | O-C=O        | H <sub>2</sub> O |
|                     | 531.5±0.5 eV | 532.3±0.5 eV | 533.3±0.5 eV              | 534.2±0.5 eV | 535.9±0.5 eV     |
| AC                  | 7.7          | 34.7         | 28.9                      | 20.7         | 8.0              |
| oAC <sub>HNO3</sub> | 14.9         | 31.1         | 26.8                      | 19.2         | 8.1              |

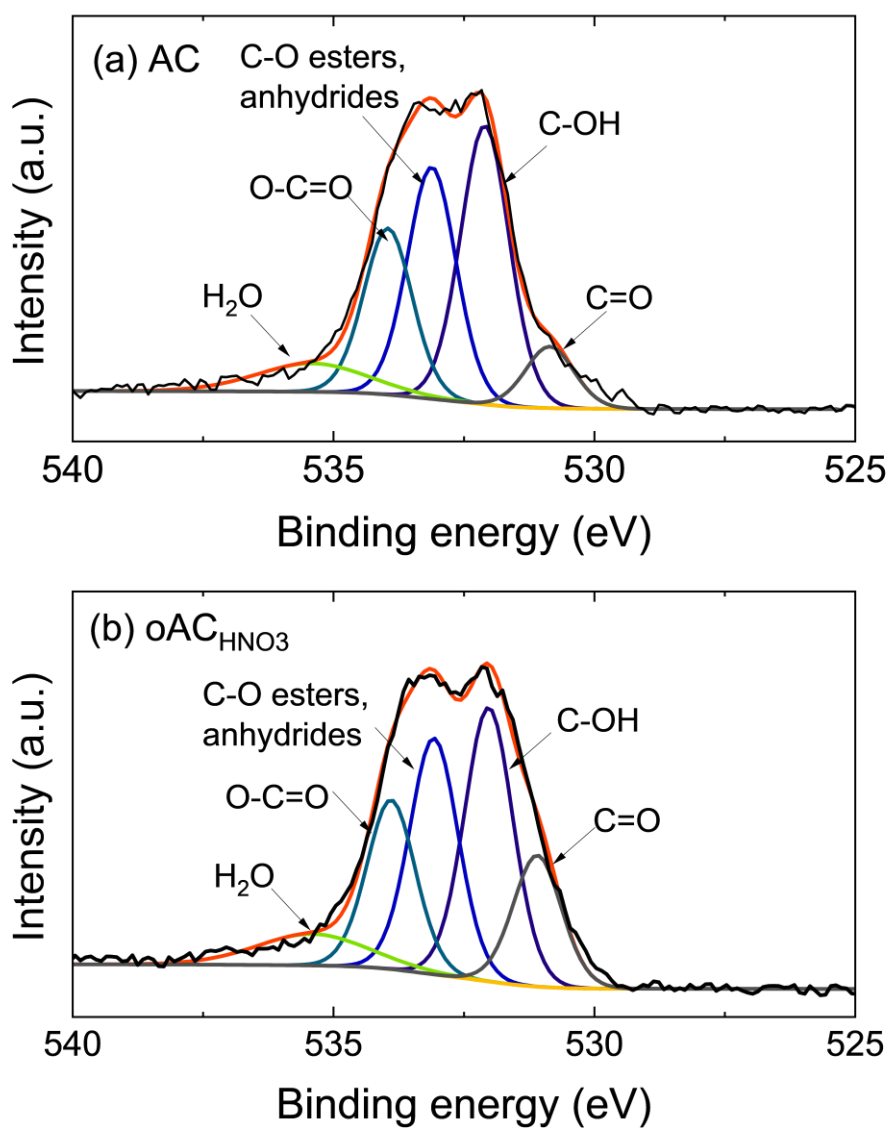

**Fig. S1** O1s XPS scan of (a) AC and (b) oAC<sub>HNO3</sub>

## TPD measurements

Temperature programmed desorption (TPD) measurement was conducted by heating the carbons from rt to 1000 °C in a He stream. During the heat treatment, desorbed CO and CO<sub>2</sub> ( $m/z = 28$  and 44) were detected by a quadrupole mass spectrometer (Pfeiffer Vacuum, QMG250 PrismaPro) and collected in a gas bag for off-line GC analysis to determine the CO and CO<sub>2</sub> amounts.

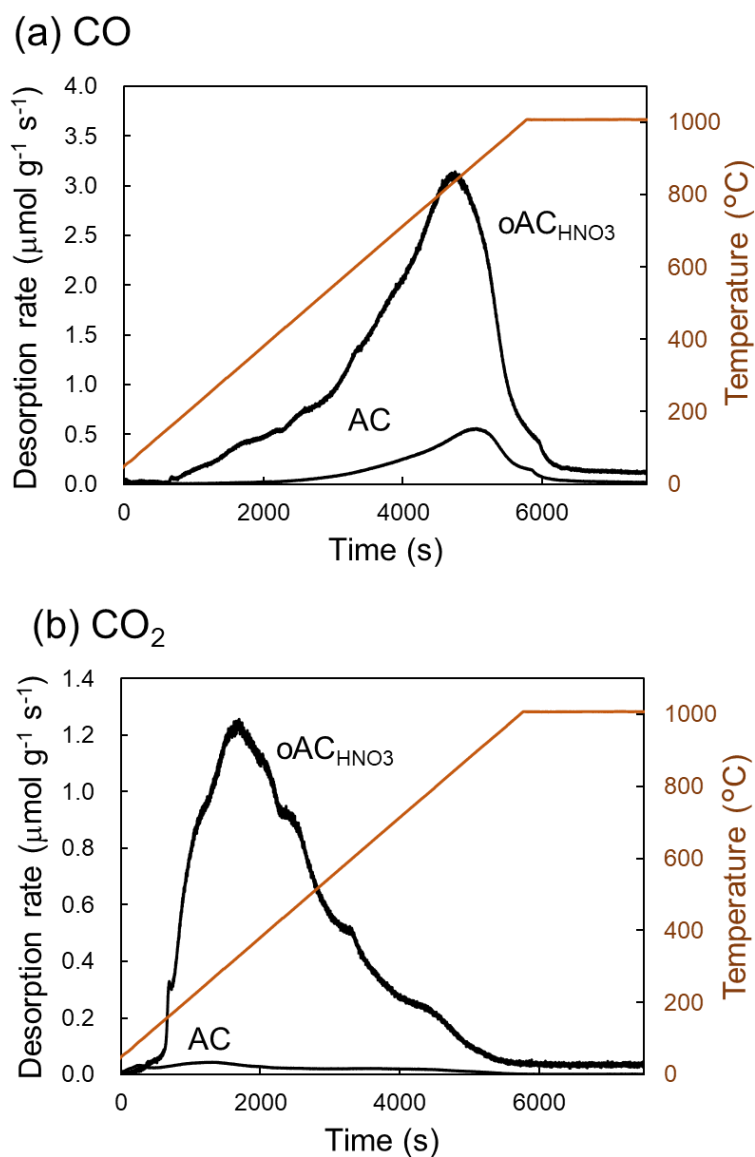

Fig. S2 TPD profiles of (a) CO and (b) CO<sub>2</sub>

Table S3 Desorption amounts of CO and CO<sub>2</sub>

| Sample              | TPD                        |                                         |
|---------------------|----------------------------|-----------------------------------------|
|                     | CO (mmol g <sup>-1</sup> ) | CO <sub>2</sub> (mmol g <sup>-1</sup> ) |
| AC                  | 0.96                       | 0.13                                    |
| oAC <sub>HNO3</sub> | 6.83                       | 2.87                                    |

## Optimization of reaction conditions

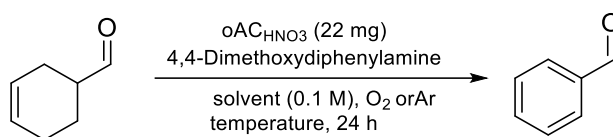

**Table S4** Screening of reaction conditions

| T (°C) | Amine amount (%) | Solvent               | Atmosphere     | Product yield <sup>1)</sup> (%) | SM conversion <sup>1)</sup> (%) |
|--------|------------------|-----------------------|----------------|---------------------------------|---------------------------------|
| 60     | 30               | Toluene               | O <sub>2</sub> | 26                              | 48                              |
| 90     | 30               | Toluene               | O <sub>2</sub> | 70                              | 90                              |
| 110    | 30               | Toluene               | O <sub>2</sub> | 90                              | >99                             |
| 90     | 10               | Toluene               | O <sub>2</sub> | 49                              | 77                              |
| 90     | 20               | Toluene               | O <sub>2</sub> | 60                              | 87                              |
| 90     | 60               | Toluene               | O <sub>2</sub> | 71                              | >99                             |
| 90     | 100              | Toluene               | O <sub>2</sub> | 74                              | >99                             |
| 90     | 30               | Toluene               | Ar             | 36                              | 55                              |
| 90     | 30               | Toluene               | air            | 43                              | 65                              |
| 60     | 30               | Acetonitrile          | O <sub>2</sub> | 22                              | 42                              |
| 60     | 30               | o-Dichlorobenzene     | O <sub>2</sub> | 21                              | 37                              |
| 60     | 30               | N,N-Dimethylformamide | O <sub>2</sub> | 10                              | 15                              |

1) determined by GC

## Chemical blocking of functional groups

Carbonyl groups were converted to phenylhydrazones with phenyl hydrazine.<sup>3</sup> Phenyl hydrazine (0.4 g, 3.7 mmol) was dissolved to deoxygenated chloroform (20 mL). oAC<sub>HNO3</sub> (0.2 g) was added to the solution and mixture was stirred at room temperature for 72 h. To remove unreacted phenyl hydrazine, modified carbocatalyst was Soxhlet extracted for 20 h. Product was dried at 60 °C under vacuum for 24 h.

Phenolic hydroxyl groups were esterified with benzoic anhydride.<sup>3</sup> Benzoic anhydride (1.0 g, 4.4 mmol) was dissolved to deoxygenated chloroform (10 mL), after which oAC<sub>HNO3</sub> (0.2 g) was added. Mixture was stirred at 60 °C for 24 hours. Modified carbocatalyst was filtered and washed with chloroform (400 mL). Product was dried at 60 °C under vacuum for 24 hours.

Carboxylic acids were esterified with 2-bromo-1-phenylethanone.<sup>3</sup> oAC<sub>HNO3</sub> (0.2 g) and 2-bromo-1-phenylethanone (0.4 g, 2.0 mmol) were mixed in deoxygenated chloroform (10 mL). Mixture was stirred for 5 hours protected from light. Modified carbocatalyst was filtered and washed with chloroform (400 mL). Product was dried at 60 °C under vacuum for 24 h.

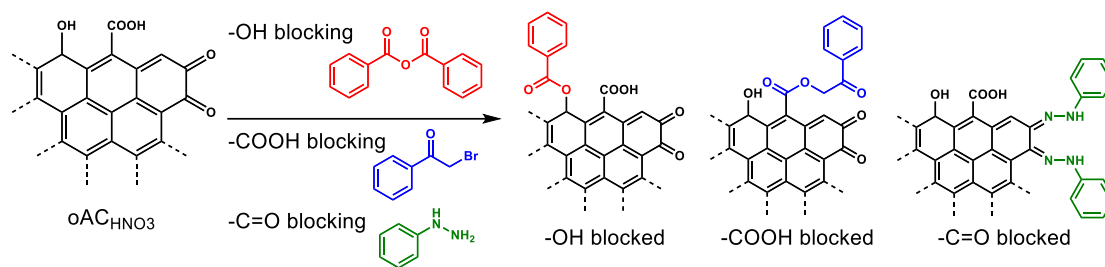

**Fig. S3** Selective blocking of oxygen functionalities on  $\text{oAC}_{\text{HNO}_3}$

**Table S5** XPS analysis of blocked carbons: summary of O1s deconvolutions

| Sample                                                   | Ratio (%)    |              |                           |              |                  |
|----------------------------------------------------------|--------------|--------------|---------------------------|--------------|------------------|
|                                                          | C=O          | C-OH         | C-O esters,<br>anhydrides | O-C=O        | H <sub>2</sub> O |
|                                                          | 531.5±0.5 eV | 532.3±0.5 eV | 533.3±0.5 eV              | 534.2±0.5 eV | 535.9±0.5 eV     |
| $\text{oAC}_{\text{HNO}_3}$                              | 14.9         | 31.0         | 26.8                      | 19.2         | 8.1              |
| OH blocked- $\text{oAC}_{\text{HNO}_3}$                  | 13.1         | 27.1         | 30.1                      | 18.9         | 10.8             |
| COOH blocked- $\text{HNO}_3^- \text{oAC}_{\text{HNO}_3}$ | 16.3         | 27.8         | 28.6                      | 16.3         | 11.0             |
| C=O blocked- $\text{oAC}_{\text{HNO}_3}$                 | 10.7         | 28.5         | 28.7                      | 22.6         | 9.5              |

**Table S6** XPS analysis of blocked carbons: atomic XPS concentrations

| Sample                                    | Atomic concentration (%) |      |                 |
|-------------------------------------------|--------------------------|------|-----------------|
|                                           | C                        | O    | N               |
| $\text{oAC}_{\text{HNO}_3}$               | 82.6                     | 17.4 | — <sup>1)</sup> |
| OH blocked- $\text{oAC}_{\text{HNO}_3}$   | 82.8                     | 17.3 | — <sup>1)</sup> |
| COOH blocked- $\text{oAC}_{\text{HNO}_3}$ | 83.8                     | 16.2 | — <sup>1)</sup> |
| C=O blocked- $\text{oAC}_{\text{HNO}_3}$  | 84.2                     | 13.8 | 1.91            |

1) Not measured

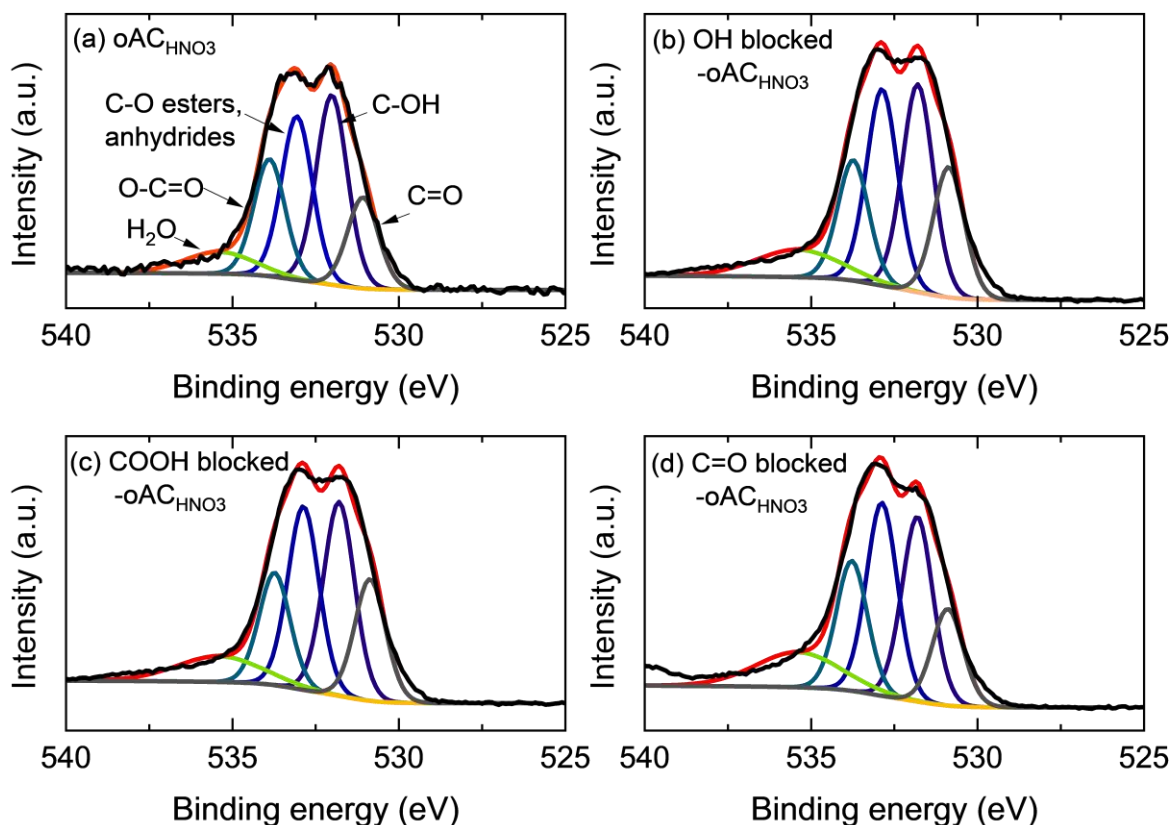

**Fig. S4** O1s XPS scan of (a)  $\text{oAC}_{\text{HNO}_3}$ , (b) OH blocked- $\text{oAC}_{\text{HNO}_3}$ , (c) COOH blocked  $\text{oAC}_{\text{HNO}_3}$  and (d) C=O blocked- $\text{oAC}_{\text{HNO}_3}$

## Catalytic tests

### General method

In a typical procedure, carbon catalyst (22 mg), cyclohexene aldehyde (0.1 mmol), secondary amine (30 mol%), and solvent (1 ml, 0.1 M) were added to a glass vial. Atmosphere was exchanged to  $\text{O}_2$  and the reaction mixture was stirred at 90 °C for 24 hours. After the reaction, the solid catalyst was separated using a Celite pad or a PTFE membrane and subsequently washed with approximately 40 ml of dichloromethane. Solvent was removed under reduced pressure, and the crude was analyzed using  $^1\text{H}$  NMR or gas chromatography-flame ionization detector (GC-FID), with 1,3,5-trimethoxybenzene serving as the internal standard to calculate the yield of the reaction

Radical-trapping experiments were conducted by adding TEMPO or 4-oxo-TEMPO (0.05 mmol) to the standard reaction mixture ( $\text{oAC}_{\text{HNO}_3}$  (22 mg), **1a** (0.1 mmol), and **A6** (30 mol%) in 1 ml toluene) and following the general method.

## Recycling test

$\text{oAC}_{\text{HNO}_3}$  (22 mg), Cyclohex-3-ene-1-carbaldehyde (**1a**, 0.1 mmol), bis(4-methoxyphenyl)amine (**A6**, 30 mol%), and toluene (1 mL, 0.1 M) were added to a test tube. The atmosphere in the tube was then exchanged to  $\text{O}_2$ , and the reaction mixture was stirred at  $90^\circ\text{C}$  for 24 hours. After the reaction, the solid catalyst was recovered by filtration through a PTFE membrane and washed with dichloromethane (40 mL). The recovered catalyst was reused for subsequent runs following the same procedure. This recycling process was repeated for five cycles. The yields were determined by gas chromatography using 1,3,5-trimethoxybenzene as an internal standard. In addition to the yield, the amine recovery (%) was calculated based on the amount of recovered amine relative to the initial amount. To investigate the influence of adsorbed amines on the activity and pore structure, a separate experiment was conducted where the catalyst recovered after 1<sup>st</sup> cycle was washed with acetic acid (AcOH) before being reused for the 2<sup>nd</sup> run.

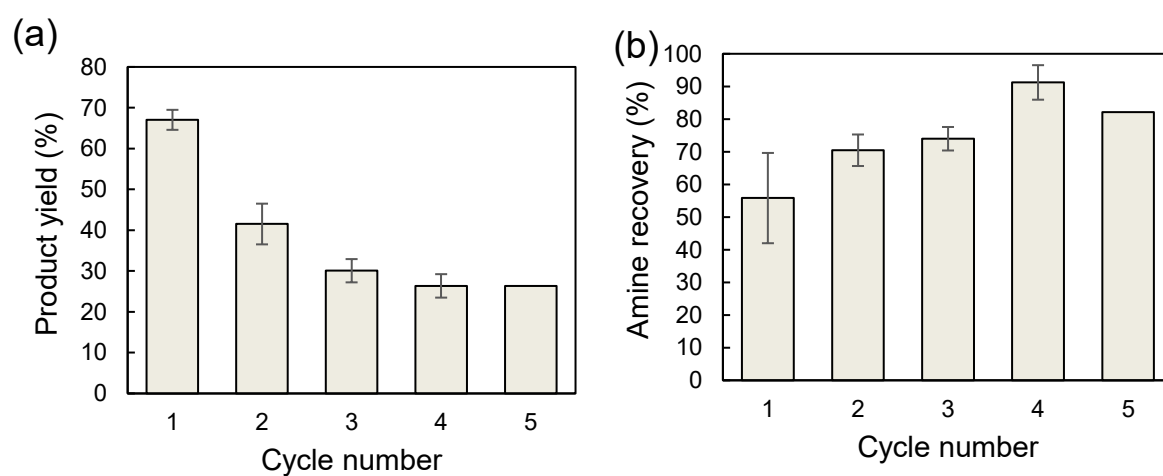

**Fig. S5** Results of recycling test, (a) product yield and (b) amine recovery.

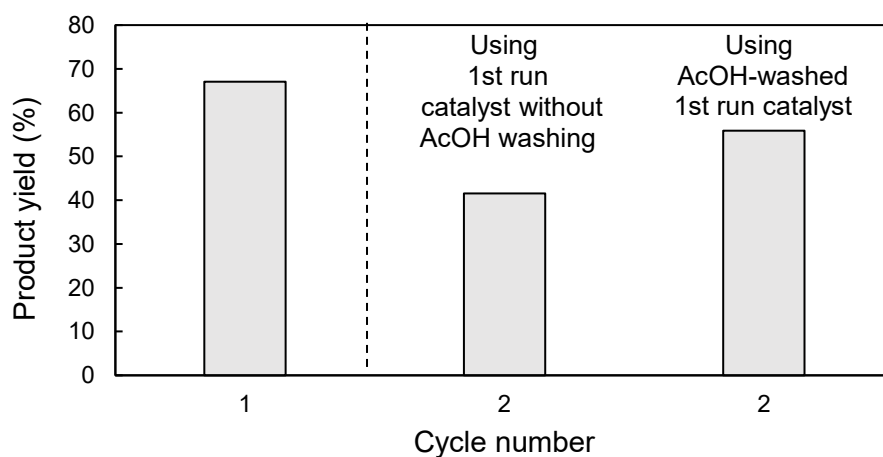

**Fig. S6** Effect of acetic acid (AcOH) washing of the used  $\text{oAC}_{\text{HNO}_3}$  on the product yield.

**Table S7** XPS analysis of oAC<sub>HNO3</sub> before and after one catalytic cycle: Atomic concentrations (%).

| Sample                                 | Atomic concentration (%) |      | O/C   |
|----------------------------------------|--------------------------|------|-------|
|                                        | C                        | O    |       |
| oAC <sub>HNO3</sub>                    | 82.6                     | 17.4 | 0.211 |
| oAC <sub>HNO3</sub><br>after 1st cycle | 83.2                     | 16.8 | 0.202 |

**Table S8** XPS analysis of oAC<sub>HNO3</sub> before and after one catalytic cycle: summary of O1s deconvolutions

| Sample                                 | Component (%) |              |                           |              |                  |
|----------------------------------------|---------------|--------------|---------------------------|--------------|------------------|
|                                        | C=O           | C-OH         | C-O esters,<br>anhydrides | O-C=O        | H <sub>2</sub> O |
|                                        | 531.5±0.5 eV  | 532.3±0.5 eV | 533.3±0.5 eV              | 534.2±0.5 eV | 535.9±0.5 eV     |
| oAC <sub>HNO3</sub>                    | 14.9          | 31.0         | 26.8                      | 19.2         | 8.1              |
| oAC <sub>HNO3</sub><br>after 1st cycle | 10.3          | 28.6         | 28.6                      | 25.0         | 7.6              |

### BET and pore volume analysis of fresh and used oAC<sub>HNO3</sub>

Specific surface area ( $S_{\text{BET}}$ ), mesopore volume ( $V_{\text{meso}}$ ) and micropore volume ( $V_{\text{micro}}$ ) of oAC<sub>HNO3</sub> both before and after the catalytic tests were determined from N<sub>2</sub> adsorption isotherms at 77 K (BELSORP MAX, MicrotracBell corp.). Prior to the measurement, the samples were pretreated at 200 °C for 2 h under vacuum to remove adsorbed water.  $S_{\text{BET}}$ ,  $V_{\text{meso}}$  and  $V_{\text{micro}}$  were calculated using Brunauer - Emmett – Teller, Barrett-Joyner-Halenda(BJH) and Dubinin-Astakhov (DA) methods, respectively.

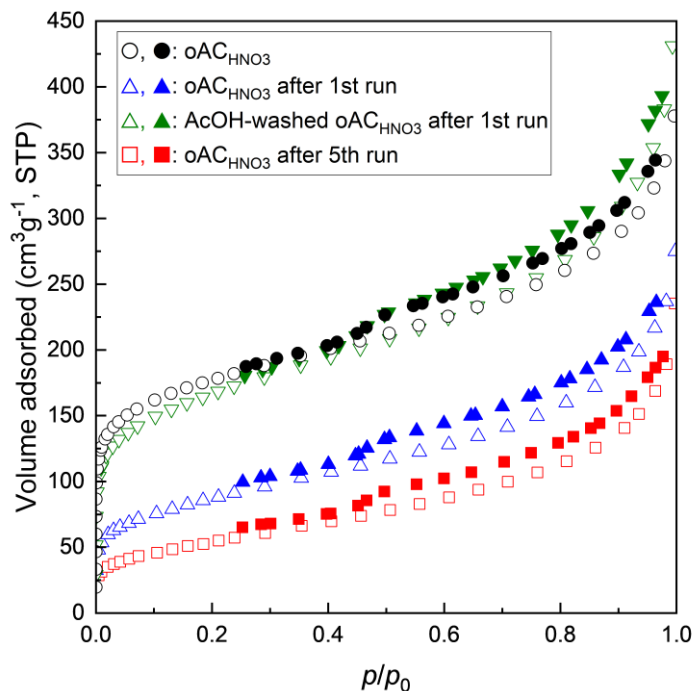

**Fig. S7** Adsorption-desorption isotherms of fresh  $\text{oAC}_{\text{HNO}_3}$  and the recovered  $\text{oAC}_{\text{HNO}_3}$  samples. Open and filled symbols represent the adsorption and desorption branches, respectively.

**Table S9**  $S_{\text{BET}}$ ,  $V_{\text{micro}}$  and  $V_{\text{meso}}$  of the fresh  $\text{oAC}_{\text{HNO}_3}$  and used  $\text{oAC}_{\text{HNO}_3}$

|                                                              | $S_{\text{BET}}$ ( $\text{m}^2 \text{g}^{-1}$ ) | $V_{\text{micro}}^2$ ( $\text{cm}^3 \text{g}^{-1}$ ) | $V_{\text{meso}}^3$ ( $\text{cm}^3 \text{g}^{-1}$ ) |
|--------------------------------------------------------------|-------------------------------------------------|------------------------------------------------------|-----------------------------------------------------|
| $\text{oAC}_{\text{HNO}_3}$                                  | 635                                             | 0.24                                                 | 0.30                                                |
| $\text{oAC}_{\text{HNO}_3}$ after 1st cycle                  | 313                                             | 0.11                                                 | 0.26                                                |
| $\text{oAC}_{\text{HNO}_3}$ after 1st cycle washed with AcOH | 598                                             | 0.22                                                 | 0.38                                                |
| $\text{oAC}_{\text{HNO}_3}$ after 5th cycle <sup>1)</sup>    | 194                                             | 0.07                                                 | 0.22                                                |

1) Sample was heat-treated at 300 °C for 3h between 4th and 5th cycles

2) Calculated by DA method

3) Calculated by BJH method

## Pore blocking tests

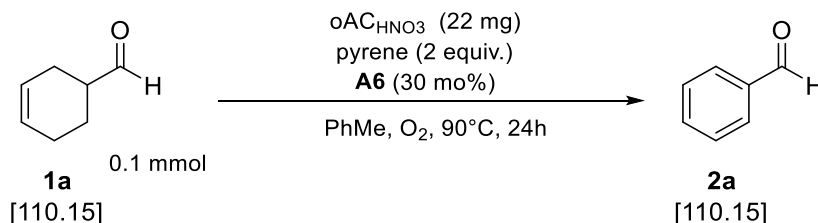

Cyclohex-3-ene-1-carbaldehyde (**1a**, 11 mg, 0.1 mmol, 1.0 equiv.), bis(4-methoxyphenyl)amine (**A6**, 6.8 mg, 0.03 mmol, 30 mol%) and  $\text{oAC}_{\text{HNO}_3}$  (22.0 mg) were added to a glass vial together with pyrene (2.0 equiv.). Toluene (1 mL) and a magnetic stir bar were added. The atmosphere was exchanged to pure oxygen, and the mixture was stirred at 90 °C for 24 h. The mixture was cooled down and filtered, then

the solid was washed with 40 ml of DCM. The yield was determined by gas chromatography-flame ionization detector (GC-FID) using 1,3,5-trimethoxybenzene as an internal standard.

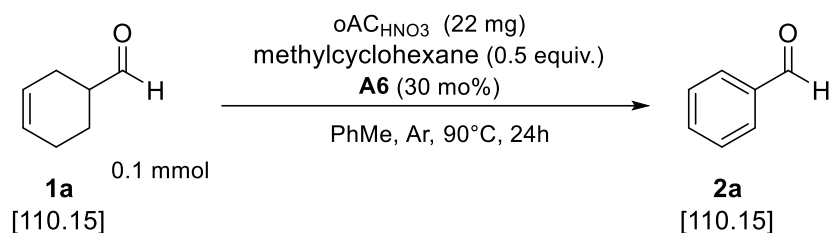

Cyclohex-3-ene-1-carbaldehyde (**1a**, 11 mg, 0.1 mmol, 1.0 equiv.), bis(4-methoxyphenyl)amine (**A6**, 6.8 mg, 0.03 mmol, 30 mol%) and  $\text{oAC}_{\text{HNO}_3}$  (22.0 mg) were added to a glass vial together with methylcyclohexane (0.5 equiv.). Toluene (1 mL) and a magnetic stir bar were added. The atmosphere was exchanged to argon, and the mixture was stirred at 90 °C for 24 h. The mixture was cooled down and filtered, then the solid was washed with 100 ml of DCM. The yield was determined by NMR, obtained yield was 32% **2a** (50% conversion).

With the same procedure, using decalin instead of methylcyclohexane, the yield obtained was 24% **2a** and 60% **1a**, while using betulin for the same purpose the reaction yielded 25% **2a** (41% conversion). Reference test under Ar in the absence of additives yielded 36% **2a** and 55% conversion (see Table S4) indicating substantial pore blocking with nonaromatic compounds.

#### Reaction with reduced graphene oxide

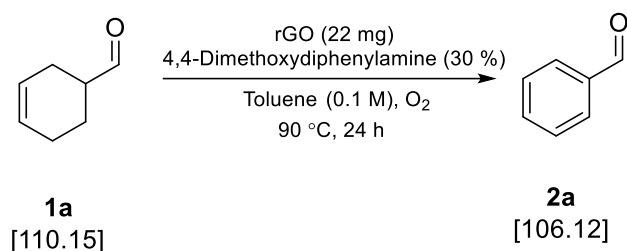

Reaction was conducted in 10 ml glass tubes, capped with Biotage cap with septa, reduced graphene oxide was (rGO) was purchased from Nanografi (Purity: 99%, S.A:1562 m<sup>2</sup>/g, 2-5 layers). Cyclohex-3-ene-1-carbaldehyde (11 mg, 0.1 mmol, 1 eq), 4,4'-Dimethoxydiphenylamine (6.9 mg, 0.03 mmol, 0.3 eq), rGO (22 mg) were measured, to which was added 1 ml of PhMe and a stir bar. Tube was capped and sonicated for 5 minutes, the atmosphere was exchanged with pure oxygen from a prefilled balloon. Tube was lowered in a 90 °C oil bath and the contents were stirred for 24 h. Filtration of the cooled reaction mixture through a celite pad was performed to remove the carbon as well as washing with 100 ml of DCM. Volatiles were removed under reduced pressure. NMR yield showed 1% **2a** and 80% **1a**.

## Effect of radical inhibitor and catalyst regeneration

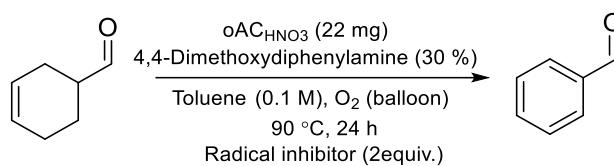

**Table S10** Effect of radical inhibitor

| Radical inhibitor | Product yield (%) | SM conversion (%) |
|-------------------|-------------------|-------------------|
| None              | 70                | 90                |
| TEMPO             | 44                | 78                |
| 2-Oxo-TEMPO       | 39                | 88                |

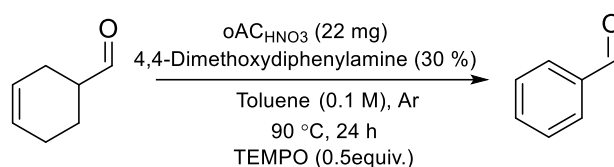

Cyclohex-3-ene-1-carbaldehyde (**1a**, 11 mg, 0.1 mmol, 1.0 equiv.), bis(4-methoxyphenyl)amine (**A6**, 6.8 mg, 0.03 mmol, 30 mol%) and  $\text{oAC}_{\text{HNO}_3}$  (22.0 mg) were added to a glass vial together with TEMPO (0.5 equiv.). Toluene (1 mL) and a magnetic stir bar were added. The atmosphere was exchanged to argon, and the mixture was stirred at 90 °C for 24 h. The mixture was cooled down and filtered, then the solid was washed with 100 ml of DCM. The yield was determined by NMR, obtained yield was 16% **2a** and 56% **1a**.

## Synthesis of starting materials

### ethyl 1,4-dithiaspiro[4.5]decane-8-carboxylate (**SI2**)<sup>4</sup>

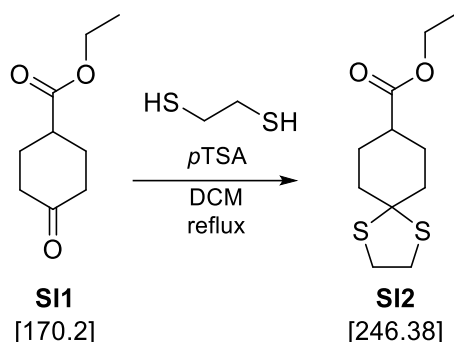

Ethyl 4-oxocyclohexane-1-carboxylate (**SI1**) (936  $\mu$ L, 1 g, 5.88 mmol, 1 eq), pTSA (280 mg, 1.47 mmol, 0.25 eq) and ethane-1,2-dithiol (591  $\mu$ L, 664 mg, 7.05 mmol, 1.2 eq) were dissolved in 90 ml  $\text{CH}_2\text{Cl}_2$  and refluxed for 24 hours. Mixture was neutralized with 2 M KOH (50 ml) and extracted with EtOAc (100 ml). Organic phase was washed with brine (20 ml) and dried over  $\text{MgSO}_4$ . Crude was purified by flash column chromatography (Hex/EtOAc 98/2  $\rightarrow$  9/1) providing ethyl 1,4-dithiaspiro[4.5]decane-8-carboxylate (**SI2**) (1.2559 g, 5.1 mmol, 87%)

<sup>1</sup>H NMR (400 MHz,  $\text{CDCl}_3$ ):  $\delta$  = 4.13 (q,  $J$  = 7.1 Hz, 2H), 3.34 – 3.25 (m, 4H), 2.30 (m, 1H), 2.22 – 2.13 (m, 2H), 2.03 – 1.90 (m, 4H), 1.86 – 1.73 (m, 2H), 1.25 (t,  $J$  = 7.1 Hz, 3H).

<sup>13</sup>C NMR (101 MHz,  $\text{CDCl}_3$ ):  $\delta$  = 175.2, 67.8, 60.5, 41.5, 39.0, 38.4, 28.5, 14.4.

### 1,4-dithiaspiro[4.5]decane-8-carbaldehyde (**SI3**)<sup>5</sup>

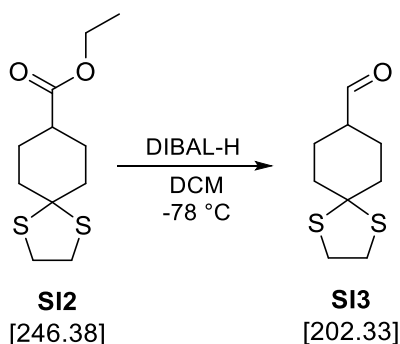

All the glassware used was oven dried overnight, dry DCM was from the VAC solvent purifier system, the reaction was carried out under argon and cooled with acetone/dry-ice bath. Ethyl 1,4-dithiaspiro[4.5]decane-8-carboxylate (**SI2**) (1.15 g, 4.67 mmol, 1 eq) was dissolved in DCM and cooled to  $-78$  °C. 1.2 M DIBAL-H in toluene (4.08 ml, 4.9 mmol, 1.05 eq) was added dropwise with a syringe. After the addition the mixture was left to stir at  $-78$  °C for 2 hours. 1 ml of dry EtOAc was added dropwise and the reaction was lifted from the dry-ice bath and left to heat up to  $0$  °C. Saturated solution of sodium potassium tartrate (50 ml) was slowly added at  $0$  °C after which the reaction was stirred for additional 30 minutes. Extraction was performed with 300 ml of DCM followed by 100 ml brine wash and drying over  $\text{MgSO}_4$ . Crude was purified by flash column chromatography (Hex/EtOAc 95/5  $\rightarrow$  8/2) providing a colorless oil 1,4-dithiaspiro[4.5]decane-8-carbaldehyde (**SI3**) (601.6 mg, 2.97 mmol, 64%).

$^1\text{H NMR}$  (400 MHz,  $\text{CDCl}_3$ ):  $\delta$  = 9.64 (s, 1H), 3.30 (m, 4H), 2.30 – 2.13 (m, 3H), 2.03 – 1.92 (m, 4H), 1.81 – 1.68 (m, 2H).

$^{13}\text{C NMR}$  (101 MHz,  $\text{CDCl}_3$ ):  $\delta$  = 203.9, 67.7, 48.2, 41.0, 38.9, 38.5, 25.5.

HRMS (ESI<sup>+</sup>): Exact mass calculated for  $\text{C}_9\text{H}_{14}\text{OS}_2$  (M)<sup>+</sup>: 202.0486, found: 202.0478

#### 2-(1,4-dithiaspiro[4.5]decan-8-yl)-1,3-dioxolane (SI4)<sup>6</sup>

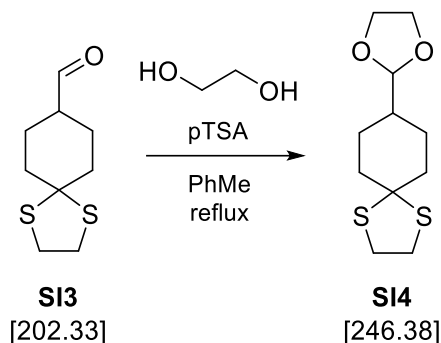

1,4-dithiaspiro[4.5]decane-8-carbaldehyde (**SI3**) (4.98 g, 24.61 mmol, 1 eq), 1,2-ethanediol (27.40 ml, 30.55 g, 492.2 mmol, 20 eq) and *p*TSA (230 mg, 1.23 mmol, 0.05 eq) were dissolved in 200 ml of toluene. The mixture was refluxed with a Dean-Stark trap attached for 5 hours. Reaction was quenched with a saturated solution of  $\text{NaHCO}_3$  (150 ml) followed by extractions with DCM (300 ml). The organic phase was first washed with water (200 ml) and brine (50 ml) then dried over  $\text{MgSO}_4$ . Crude product was purified by flash column chromatography (Hex/EtOAc 9/1  $\rightarrow$  8/2) providing a colourless oil 2-(1,4-dithiaspiro[4.5]decan-8-yl)-1,3-dioxolane (**SI4**) (5.5962 g, 22.71 mmol, 92%).

$^1\text{H NMR}$  (400 MHz,  $\text{CDCl}_3$ ):  $\delta$  = 4.61 (d,  $J$  = 4.9 Hz, 1H), 3.98 – 3.77 (m, 4H), 3.34 – 3.21 (m, 4H), 2.17 (d,  $J$  = 13.5 Hz, 2H), 1.97 – 1.76 (m, 1H), 1.59 – 1.35 (m, 1H).

$^{13}\text{C NMR}$  (101 MHz,  $\text{CDCl}_3$ ):  $\delta$  = 106.95, 68.40, 65.09, 41.89, 40.43, 38.91, 38.18, 26.91.

HRMS (ESI<sup>+</sup>): Exact mass calculated for  $\text{C}_{11}\text{H}_{18}\text{O}_2\text{S}_2$  (M)<sup>+</sup>: 246.0748, found: 246.0753

#### 4-(1,3-dioxolan-2-yl)cyclohexan-1-one (SI5)<sup>4</sup>

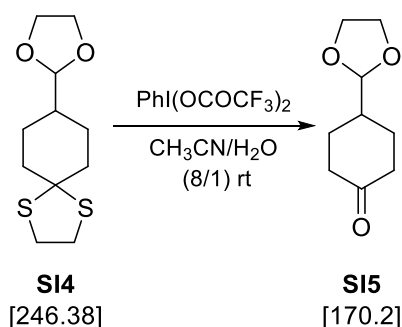

1,4-dithiaspiro[4.5]decane-8-carbaldehyde (**SI4**) (5.5 g, 22.3 mmol, 1 eq) was dissolved in a mixture of  $\text{CH}_3\text{CN}$  (120 ml) and water (15 ml). Phenyl iodine bis(trifluoroacetate) (22.1 g, 51.3 mmol, 2.3 eq) was added at once, the reaction was stirred for a minute and then quenched with saturated solution of  $\text{NaHCO}_3$  (150 ml). Aqueous phase was extracted with EtOAc (750 ml), combined organic phases were washed with brine (100 ml) and dried over  $\text{MgSO}_4$ . Crude product was purified by flash column

chromatography (Hex/EtOAc 9/1 → 6/4) providing a pale-yellow oil 4-(1,3-dioxolan-2-yl)cyclohexan-1-one (**S15**) (3.1842 g, 18.7 mmol, 84%).

$^1\text{H NMR}$  (400 MHz,  $\text{CDCl}_3$ ):  $\delta$  = 4.74 (d,  $J$  = 4.8 Hz, 1H), 4.03 – 3.82 (m, 4H), 2.51 – 2.39 (m, 2H), 2.39 – 2.26 (m, 2H), 2.19 – 2.07 (m, 2H), 2.07 – 1.94 (m, 1H), 1.69 – 1.53 (m, 2H).

$^{13}\text{C NMR}$  (101 MHz,  $\text{CDCl}_3$ ):  $\delta$  = 211.63, 106.29, 65.27, 40.39, 39.99, 26.98.

#### 4-(1,3-dioxolan-2-yl)-1-phenylcyclohexan-1-ol (**S16**)

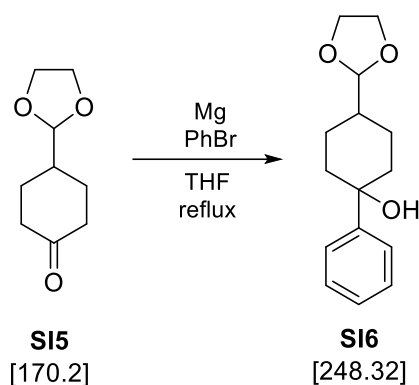

All the glassware used was oven dried overnight, dry THF was from the VAC solvent purifier system, and the reaction was carried out under argon. Magnesium turnings (189 mg, 7.76 mmol, 2.2 eq) were added to a round bottom flask along with 12 ml of THF. Bromobenzene (389  $\mu\text{L}$ , 581mg, 3.7 mmol, 1.05 eq) was slowly added with a syringe, and an iodine crystal was added to start the reaction. Reaction was refluxed for 30 minutes and then the 4-(1,3-dioxolan-2-yl)cyclohexan-1-one (**S15**) (600 mg, 3.53 mmol, 1 eq) was added slowly and reflux was continued for additional 4 hours. Reaction was cooled to room temperature and quenched with 30 ml of  $\text{NH}_4\text{Cl}$  saturated solution. Extraction was performed three times with 30 ml EtOAc, combined organic layers were then neutralized with 30 ml 1 M NaOH, washed with brine and dried with  $\text{MgSO}_4$ . Crude product was purified by flash chromatography (Hex/EtOAc 8/2 → 1/1) providing 4-(1,3-dioxolan-2-yl)-1-phenylcyclohexan-1-ol (**S16**) (328 mg, 1.32 mmol, 37%).

$^1\text{H NMR}$  (400 MHz,  $\text{CDCl}_3$ ):  $\delta$  = 7.49 – 7.39 (m, 2H), 7.28 (q,  $J$  = 7.6 Hz, 2H), 7.24 – 7.13 (m, 1H), 4.66 – 4.60 (m, 1H), 3.96 – 3.69 (m, 4H), 2.39 – 2.28 (m, 1H), 1.88 – 1.52 (m, 8H), 1.38 – 1.25 (m, 1H).

$^{13}\text{C NMR}$  (101 MHz,  $\text{CDCl}_3$ ):  $\delta$  = 149.4, 128.6, 128.4, 127.4, 126.9, 125.8, 124.6, 107.4, 106.6, 73.4, 72.9, 65.1, 65.0, 41.1, 39.5, 38.1, 36.7, 24.0, 22.8.

## 2-(2,3,4,5-tetrahydro-[1,1'-biphenyl]-4-yl)-1,3-dioxolane (**S17**)<sup>7</sup>

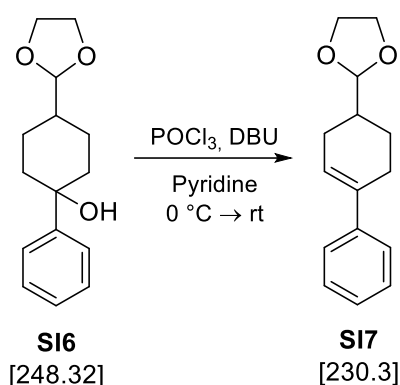

All the glassware used was oven dried overnight, pyridine was dried with molecular sieves (4Å) and the reaction was carried out under argon. 4-(1,3-dioxolan-2-yl)-1-phenylcyclohexan-1-ol (**S16**) (328 mg, 1.32 mmol, 1 eq) was dissolved in 5 ml of pyridine. POCl<sub>3</sub> (492 μL, 810 mg, 5.28 mmol, 4 eq) was added with a syringe at 0 °C followed by the addition of DBU (197 μL, 201 mg, 1.32 mmol, 1 eq). The reaction mixture was stirred at room temperature for 5 h. Quenching was performed with 20 ml of water and extraction with 50 ml of EtOAc, followed by three water washings (90 ml) and a brine wash (30 ml). Organic layer was dried with MgSO<sub>4</sub>. Crude product was purified by flash column chromatography (Hex/EtOAc 75/25) providing 2-(2,3,4,5-tetrahydro-[1,1'-biphenyl]-4-yl)-1,3-dioxolane (**S17**) (213.8 mg, 0.93 mmol, 70%).

<sup>1</sup>H NMR (400 MHz, CDCl<sub>3</sub>): δ = 7.38 (d, *J* = 7.5 Hz, 2H), 7.30 (t, *J* = 6.8 Hz, 2H), 7.22 (t, *J* = 7.3 Hz, 1H), 6.16 – 6.08 (m, 1H), 4.77 (d, *J* = 5.3 Hz, 1H), 4.05 – 3.83 (m, 4H), 2.58 – 2.40 (m, 2H), 2.41 – 2.30 (m, 1H), 2.19 – 1.99 (m, 2H), 1.90 (m, 1H), 1.62 – 1.47 (m, 1H).

<sup>13</sup>C NMR (101 MHz, CDCl<sub>3</sub>): δ = 142.24, 136.65, 128.36, 126.81, 125.12, 123.45, 107.25, 65.15, 37.63, 26.99, 26.91, 24.06.

HRMS (ESI<sup>+</sup>): Exact mass calculated for C<sub>15</sub>H<sub>18</sub>O<sub>2</sub> (M)<sup>+</sup>: 230.1307, found: 230.1298

## 4-Phenyl-3-cyclohexene-1-carboxaldehyde (**1c**)

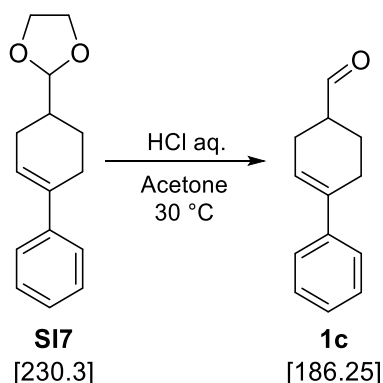

2-(2,3,4,5-tetrahydro-[1,1'-biphenyl]-4-yl)-1,3-dioxolane (**S17**) (100mg, 0.434 mmol) was dissolved in acetone (3 ml). Mixture of water (1.5 ml) and concentrated HCl (0.5 ml) were added as well. Reaction was stirred for 24 h at 30 °C. Quenching was performed with saturated solution of NaHCO<sub>3</sub> (30 ml), the aqueous layer was extracted three times with a total of 90 ml EtOAc. Organic phases were combined then washed with brine and dried over MgSO<sub>4</sub>. Crude product was purified by flash column

chromatography (Hex/EtOAc 9/1) providing 4-Phenyl-3-cyclohexene-1-carboxaldehyde (**1c**) (78.7 mg, 0.27 mmol, 75%)

<sup>1</sup>H NMR (500 MHz, CDCl<sub>3</sub>): δ = 9.77 (s, 1H), 7.37-7.22 (m, 5H), 6.13 (m, 1H), 2.62-2.46 (m, 5H), 2.20-2.15 (m, 1H), 1.88-1.80 (m, 1H).

<sup>13</sup>C NMR (126 MHz, CDCl<sub>3</sub>): δ = 204.4, 141.8, 137.0, 128.4, 127.1, 125.2, 122.2, 45.9, 26.2, 25.2, 22.8.

#### 4-(naphthalen-1-yl)cyclohex-3-ene-1-carbaldehyde (**1d**)

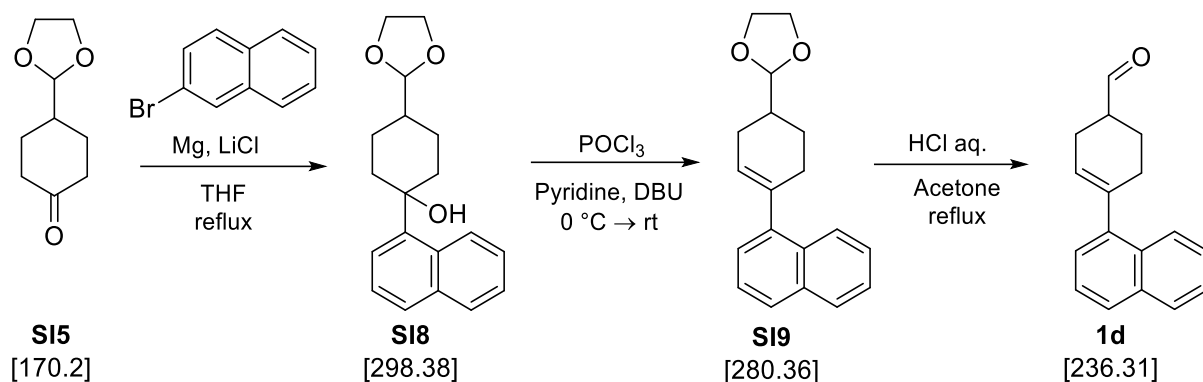

The product 4-(naphthalen-1-yl)cyclohex-3-ene-1-carbaldehyde (**1d**) was obtained from 4-(1,3-dioxolan-2-yl)cyclohexan-1-one (**S15**) without isolation of the intermediary products in steps 1 and 2. In steps 2 and 3 reagents were used in excess based on the theoretical yield from the previous steps.

- Step:** All the glassware used was oven-dried overnight, dry THF was from the VAC solvent purifier system and the reaction was carried out under argon. Lithium chloride was dried under vacuum at 110 °C. Magnesium turnings (106.9 mg, 4.4 mmol, 1.15 eq) and lithium-chloride (169.5 mg, 4.0 mmol, 1.05 eq) were added to a round bottom flask along with 5 ml of THF. 2-bromonaphthalene (560 μL, 828.2 mg, 4.0 mmol, 1.05 eq) was slowly added with a syringe, and an iodine crystal was added to start the reaction. Reaction was stirred for 30 minutes at room temperature and then the 4-(1,3-dioxolan-2-yl)cyclohexan-1-one (646.9 mg, 3.8 mmol, 1 eq) was added slowly and refluxed for further 3 hours. Reaction was cooled down to room temperature and quenched with 30 ml of NH<sub>4</sub>Cl saturated solution. Extraction was performed three times with 50 ml EtOAc, combined organic layers were washed with brine (50 ml) and dried with MgSO<sub>4</sub>.
- Step:** All the glassware used was oven dried overnight, pyridine was dried with molecular sieves (4Å) and the reaction was carried out under argon. Crude (1 eq) from the previous step was dissolved in 20 ml of pyridine. POCl<sub>3</sub> (1.25 ml, 2.0570 g, 13.4 mmol, 4 eq) was added with a syringe at 0 °C followed by the addition of DBU (500 μL, 510 mg, 3.35 mmol, 1 eq). The reaction mixture was stirred at room temperature for 6 h. Quenching was performed with 50 ml of water and extraction with 150 ml EtOAc, followed by three water washings (150 ml) and a brine wash (50 ml). Organic layer was dried with MgSO<sub>4</sub>.
- Step:** Crude (1 eq) was dissolved in acetone (28 ml). A mixture of water (15 ml) and concentrated HCl (4 ml) was added, and the reaction was refluxed for 24 h. Quenching was performed with saturated solution of NaHCO<sub>3</sub> (30 ml), the aqueous layer was extracted three times with a total of 150 ml EtOAc. Combined organic phases were then washed with brine and dried over MgSO<sub>4</sub>. Crude product was purified by flash column chromatography (Hex/EtOAc 95/5) providing a colorless oil 4-(naphthalen-1-yl)cyclohex-3-ene-1-carbaldehyde (**1d**) (275 mg, 1.16 mmol, 30%)

<sup>1</sup>H NMR (500 MHz, CDCl<sub>3</sub>): δ = 9.85 (s, 1H), 7.92-7.90 (m, 1H), 7.86-7.84 (m, 1H), 7.75 (d, *J*=8.2 Hz, 1H), 7.47-7.46 (m, 2H), 7.42 (t, *J*=15.3 Hz, 2H), 7.24 (d, *J*=7 Hz, 1H), 5.81 (m, 1H), 2.76-2.70 (m, 1H), 2.54-2.49 (m, 4H), 2.24-2.18 (m, 1H), 2.01-1.94 (m, 1H).

<sup>13</sup>C NMR (126 MHz, CDCl<sub>3</sub>): δ = 204.4, 142.0, 138.1, 133.9, 131.4, 128.5, 127.3, 125.9, 125.8, 125.6, 125.5, 125.1, 124.9, 45.9, 29.7, 24.8, 22.9.

HRMS (ESI<sup>+</sup>): Exact mass calculated for C<sub>17</sub>H<sub>16</sub>O (M)<sup>+</sup>: 236.1201, found: 236.1201

#### 4'-(trifluoromethyl)-2,3,4,5-tetrahydro-[1,1'-biphenyl]-4-carbaldehyde (**1e**)

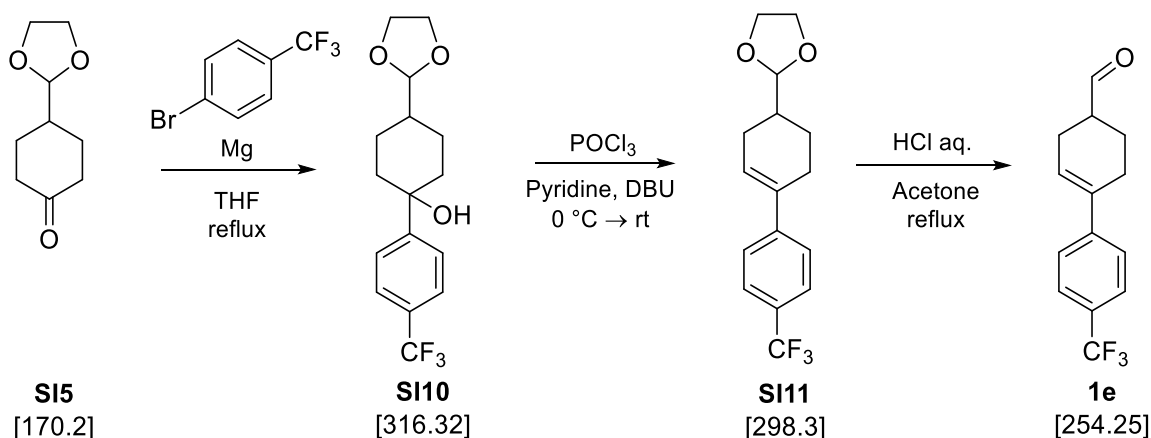

The product 4'-(trifluoromethyl)-2,3,4,5-tetrahydro-[1,1'-biphenyl]-4-carbaldehyde (**1e**) was obtained from 4-(1,3-dioxolan-2-yl)cyclohexan-1-one (**S15**) without isolation of the intermediary products in steps one and two. In steps 2 and 3 reagents were used in excess based on the theoretical yield from the previous steps.

- Step:** All the glassware used was oven-dried overnight, dry THF was from the VAC solvent purifier system and the reaction was carried out under argon. Magnesium turnings (97.2 mg, 4.0 mmol, 2.2 eq) were added to a round bottom flask along with 12 ml of THF. 1-bromo-4-(trifluoromethyl)benzene (280 μL, 450 mg, 2.0 mmol, 1.1 eq) was slowly added with a syringe, and an iodine crystal was added to start the reaction. Reaction was refluxed for 5 h and then the 4-(1,3-dioxolan-2-yl)cyclohexan-1-one (**S15**) (309 mg, 1.81 mmol, 1 eq) was added slowly and reflux was continued for additional 4 hours. Reaction was cooled to room temperature and quenched with 30 ml of NH<sub>4</sub>Cl saturated solution. Extraction was performed three times with 30 ml EtOAc, combined organic layers were then neutralized with 30 ml 1 M NaOH, washed with brine and dried with MgSO<sub>4</sub>.
- Step:** All the glassware used was oven dried overnight, pyridine was dried with molecular sieves (4Å) and the reaction was carried out under argon. Crude (1 eq) from the previous step was dissolved in 8 ml of pyridine. POCl<sub>3</sub> (398 μL, 655 mg, 4.27 mmol, 4 eq) was added with a syringe at 0 °C followed by the addition of DBU (160 μL, 162.2 mg, 1.06 mmol, 1 eq). The reaction mixture was stirred at room temperature for 5 h. Quenching was performed with 20 ml of water and extraction with 50 ml of EtOAc, followed by three water washings (90 ml) and a brine wash (30 ml). Organic layer was dried with MgSO<sub>4</sub>.
- Step:** Crude (1 eq) was dissolved in acetone (7 ml). A mixture of water (3.5 ml) and concentrated HCl (1 ml) was added, and the reaction was refluxed for 24 h. Quenching was performed with saturated solution of NaHCO<sub>3</sub> (30 ml), the aqueous layer was extracted three times with a total of 90 ml EtOAc. Combined organic phases were then washed with brine and dried over MgSO<sub>4</sub>. Crude product was purified by flash column chromatography (Hex/EtOAc)

9/1) providing 4'-(trifluoromethyl)-2,3,4,5-tetrahydro-[1,1'-biphenyl]-4-carbaldehyde (**1e**) (221 mg, 0.87 mmol, 48%)

<sup>1</sup>H NMR (500 MHz, CDCl<sub>3</sub>): δ = 9.77 (s, 1H), 7.56 (d, J=8.2 Hz, 2H), 7.45 (d, J=8.4 Hz, 2H), 6.21 (m, 1H), 2.64-2.58 (m, 1H), 2.52-2.49 (m, 4H), 2.22-2.17 (m, 1H), 1.90-1.82 (m, 1H).

<sup>13</sup>C NMR (126 MHz, CDCl<sub>3</sub>): δ = 204.0, 145.2, 136.1, 129.2, 129.0, 125.4-125.3 (m, 2C), 124.5, 45.6, 26.1, 25.2, 22.6.

<sup>19</sup>F NMR (377 MHz, CDCl<sub>3</sub>): δ = -62.43.

### 3',4'-dimethoxy-2,3,4,5-tetrahydro-[1,1'-biphenyl]-4-carbaldehyde (**1f**)

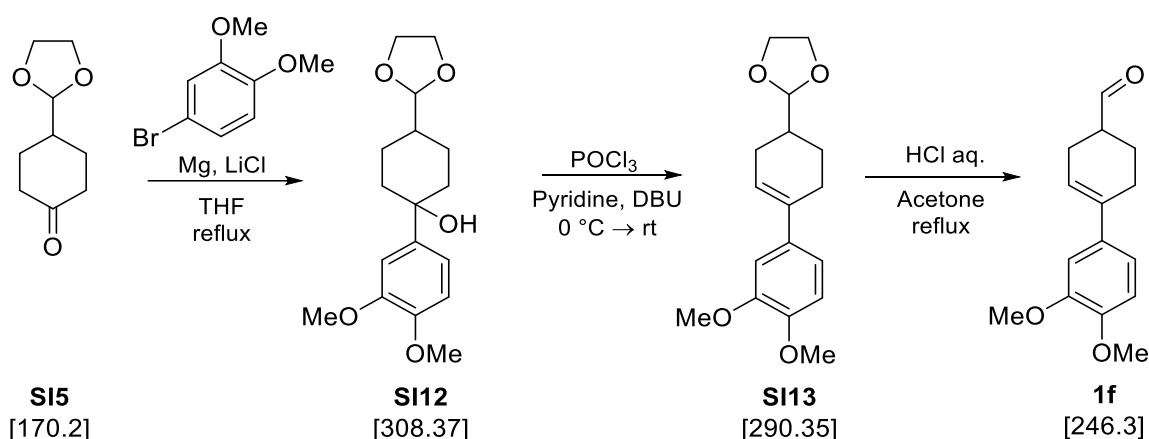

The product 3',4'-dimethoxy-2,3,4,5-tetrahydro-[1,1'-biphenyl]-4-carbaldehyde (**1f**) was obtained from 4-(1,3-dioxolan-2-yl)cyclohexan-1-one (**S15**) without isolation of the intermediary products in steps one and two. In steps 2 and 3 reagents were used in excess based on the theoretical yield from the previous steps.

- Step:** All the glassware used was oven-dried overnight, dry THF was from the VAC solvent purifier system and the reaction was carried out under argon. Lithium chloride was dried under vacuum at 110 °C. Magnesium turnings (106.9 mg, 4.4 mmol, 1.15 eq) and lithium-chloride (169.5 mg, 4.0 mmol, 1.05 eq) were added to a round bottom flask along with 5 ml of THF. 2-bromoveratrole (520 μL, 784 mg, 4.0 mmol, 1.05 eq) was slowly added with a syringe, and an iodine crystal was added to start the reaction. Reaction was refluxed for 3 hours and then 4-(1,3-dioxolan-2-yl) cyclohexan-1-one (**S15**) (637 mg, 3.8 mmol, 1 eq) dissolved in 5 ml of THF was added slowly and refluxed for 1 hour. Reaction was cooled down to room temperature and quenched with 30 ml of NH<sub>4</sub>Cl saturated solution. Extraction was performed three times with 50 ml EtOAc, combined organic layers were washed with brine (50 ml) and dried with MgSO<sub>4</sub>.
- Step:** All the glassware used was oven dried overnight, pyridine was dried with molecular sieves (4Å) and the reaction was carried out under argon. Crude (1 eq) from the previous step was dissolved in 15 ml of pyridine. POCl<sub>3</sub> (1.42 ml, 2.3359 g, 15.2 mmol, 4 eq) was added with a syringe at 0 °C followed by the addition of DBU (570 μL, 580.2 mg, 3.8 mmol, 1 eq). The reaction mixture was stirred at room temperature for 6 h. Quenching was performed with 50 ml of water and extraction with 150 ml EtOAc, followed by three water washings (150 ml) and a brine wash (50 ml). Organic layer was dried with MgSO<sub>4</sub>.
- Step:** Crude (1 eq) was dissolved in acetone (28 ml). A mixture of water (15 ml) and concentrated HCl (4 ml) was added, and the reaction was refluxed for 24 h. Quenching was

performed with saturated solution of NaHCO<sub>3</sub> (30 ml), the aqueous layer was extracted three times with a total of 150 ml EtOAc. Combined organic phases were then washed with brine and dried over MgSO<sub>4</sub>. Crude product was purified by flash column chromatography (Hex/EtOAc 9/1) providing a colorless oil 3',4'-dimethoxy-2,3,4,5-tetrahydro-[1,1'-biphenyl]-4-carbaldehyde (**1f**) (207.6 mg, 0.84 mmol, 23%)

<sup>1</sup>H NMR (400 MHz, CDCl<sub>3</sub>): δ = 9.76 (s, 1H), 6.90 (sex, *J*=2.4, 2H), 6.83-6.80 (m, 1H), 6.04 (m, 1H), 3.89 (s, 3H), 3.87 (s, 3H), 2.61-2.57 (m, 1H), 2.54-2.43 (m, 4H), 2.19-2.12 (m, 1H), 1.88-1.78 (m, 1H).

<sup>13</sup>C NMR (101 MHz, CDCl<sub>3</sub>): δ = 204.4, 148.8, 148.3, 136.6, 134.8, 120.9, 117.5, 111.0, 108.6, 56.0, 56.0, 45.9, 26.3, 25.1, 22.8.

HRMS (ESI<sup>+</sup>): Exact mass calculated for C<sub>15</sub>H<sub>18</sub>O<sub>3</sub> (M)<sup>+</sup>: 246.1256, found: 246.1251

### 3',5'-dimethyl-2,3,4,5-tetrahydro-[1,1'-biphenyl]-4-carbaldehyde (**1g**)

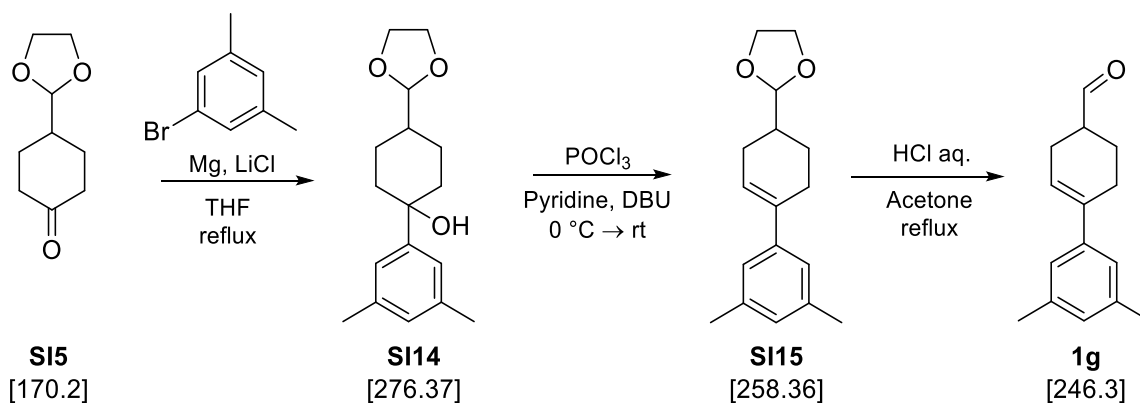

The product 3',5'-dimethyl-2,3,4,5-tetrahydro-[1,1'-biphenyl]-4-carbaldehyde (**1g**) was obtained from 4-(1,3-dioxolan-2-yl)cyclohexan-1-one (**SI5**) without isolation of the intermediary products in steps one and two. In steps 2 and 3 reagents were used in excess based on the theoretical yield from the previous steps.

- Step:** All the glassware used was oven-dried overnight, dry THF was from the VAC solvent purifier system and the reaction was carried out under argon. Lithium chloride was dried under vacuum at 110 °C. Magnesium turnings (106.9 mg, 4.4 mmol, 1.15 eq) and lithium-chloride (169.5 mg, 4.0 mmol, 1.05 eq) were added to a round bottom flask along with 5 ml of THF. 5-Bromo-*m*-xylene (540 μL, 735.5 mg, 4.0 mmol, 1.05 eq) was slowly added with a syringe, and an iodine crystal was added to start the reaction. Reaction was refluxed for 2 hours and then 4-(1,3-dioxolan-2-yl)cyclohexan-1-one (**SI5**) (638.1 mg, 3.8 mmol, 1 eq) was added slowly and refluxed for 2 hours. Reaction was cooled to room temperature and quenched with 30 ml of NH<sub>4</sub>Cl saturated solution. Extraction was performed three times with 50 ml EtOAc, combined organic layers were washed with brine (50 ml) and dried with MgSO<sub>4</sub>.
- Step:** All the glassware used was oven dried overnight, pyridine was dried with molecular sieves (4Å) and the reaction was done under argon. Crude (1 eq) from the previous step was dissolved in 15 ml of pyridine. POCl<sub>3</sub> (1.42 ml, 2.3359 g, 15.2 mmol, 4 eq) was added with a syringe at 0 °C followed by the addition of DBU (570 μL, 580.2 mg, 3.8 mmol, 1 eq). The reaction mixture was stirred at room temperature for 6 h. Quenching was performed with 50 ml of water and extraction with 150 ml EtOAc, followed by three water washings (150 ml) and a brine wash (50 ml). Organic layer was dried with MgSO<sub>4</sub>.
- Step:** Crude (1 eq) was dissolved in acetone (28 ml). A mixture of water (15 ml) and concentrated HCl (4 ml) was added, and the reaction was refluxed for 24 h. Quenching was performed with saturated solution of NaHCO<sub>3</sub> (30 ml), the aqueous layer was extracted three

times with a total of 150 ml EtOAc. Combined organic phases were then washed with brine and dried over MgSO<sub>4</sub>. Crude product was purified by flash column chromatography (Hex/EtOAc 95/5) providing overall a colorless oil 3',5'-dimethyl-2,3,4,5-tetrahydro-[1,1'-biphenyl]-4-carbaldehyde (**1g**) (240.3 mg, 1.12 mmol, 30%)

<sup>1</sup>H NMR (500 MHz, CDCl<sub>3</sub>): δ = 9.76 (s, 1H), 6.98 (s, 2H), 6.89 (s, 1H), 6.08 (m, 1H), 2.60-2.44 (m, 5H), 2.31 (s, 6H), 2.19-2.13 (m, 1H), 1.85-1.78(m, 1H).

<sup>13</sup>C NMR (126 MHz, CDCl<sub>3</sub>): δ = 204.5, 141.9, 137.9, 137.2, 128.8, 123.2, 121.8, 46.0, 26.4, 25.2, 22.9, 21.5.

HRMS (ESI<sup>+</sup>): Exact mass calculated for C<sub>15</sub>H<sub>18</sub>O (M)<sup>+</sup>: 214.1358, found: 214.1359

#### 4'-(dimethylamino)-2,3,4,5-tetrahydro-[1,1'-biphenyl]-4-carbaldehyde (**1h**)

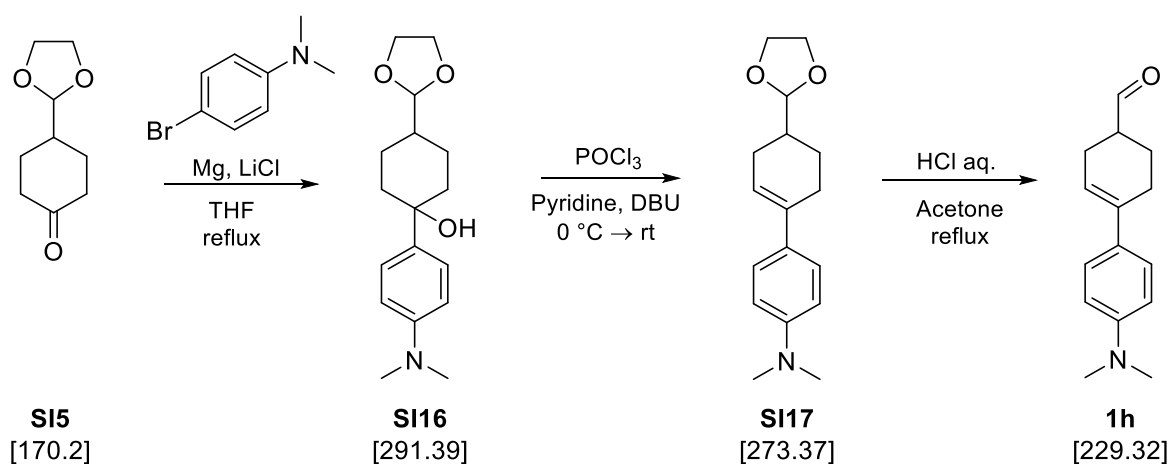

The product 4'-(dimethylamino)-2,3,4,5-tetrahydro-[1,1'-biphenyl]-4-carbaldehyde (**1h**) was obtained from 4-(1,3-dioxolan-2-yl)cyclohexan-1-one (**S15**) without isolation of the intermediary products in steps one and two. In steps 2 and 3 reagents were used in excess based on the theoretical yield from the previous steps.

- Step:** All the glassware used was oven-dried overnight, dry THF was from the VAC solvent purifier system and the reaction was carried out under argon. Lithium chloride was dried under vacuum at 110 °C. Magnesium turnings (106.9 mg, 4.4 mmol, 1.15 eq) and lithium-chloride (169.5 mg, 4.0 mmol, 1.05 eq) were added to a round bottom flask along with 5 ml of THF. 4-bromo-*N,N*-dimethylaniline (802 mg, 4.0 mmol, 1.05 eq) was slowly added with a syringe, and an iodine crystal was added to start the reaction. Reaction was refluxed for 2 hours and then the 4-(1,3-dioxolan-2-yl)cyclohexan-1-one (**S15**) (639 mg, 3.8 mmol, 1 eq) was added slowly and refluxed overnight. Reaction was cooled to room temperature and quenched with 30 ml of NH<sub>4</sub>Cl saturated solution. Extraction was performed three times with 50 ml EtOAc, combined organic layers were washed with brine (50 ml) and dried with MgSO<sub>4</sub>.
- Step:** All the glassware used was oven dried overnight, pyridine was dried with molecular sieves (4Å) and the reaction was carried out under argon. Crude (1 eq) from the previous step was dissolved in 15 ml of pyridine. POCl<sub>3</sub> (1.42 ml, 2.3359 g, 15.2 mmol, 4 eq) was added with a syringe at 0 °C followed by the addition of DBU (570 μL, 580.2 mg, 3.8 mmol, 1 eq). The reaction mixture was stirred at room temperature for 6 h. Quenching was performed with 50 ml of water and extraction with 150 ml of EtOAc, followed by three water washings (150 ml) and a brine wash (50 ml). Organic layer was dried with MgSO<sub>4</sub>.
- Step:** Crude (1 eq) was dissolved in acetone (28 ml). A mixture of water (15 ml) and concentrated HCl (4 ml) was added, and the reaction was refluxed for 24 h. Quenching was performed with saturated solution of NaHCO<sub>3</sub> (30 ml), the aqueous layer was extracted three

times with a total of 150 ml EtOAc. Combined organic phases were then washed with brine and dried over MgSO<sub>4</sub>. Crude product was purified by flash column chromatography (Hex/EtOAc 95/5) providing a yellow solid 4'-(dimethylamino)-2,3,4,5-tetrahydro-[1,1'-biphenyl]-4-carbaldehyde (**1h**) (248 mg, 1.08 mmol, 28%)

<sup>1</sup>H NMR (400 MHz, CDCl<sub>3</sub>): δ = 9.75 (d, *J*=1.36 Hz, 1H), 7.28 (d, *J*=9 Hz, 2H), 6.69 (d, *J*=9 Hz, 2H), 6.00 (m, 1H), 2.95 (s, 6H), 2.59-2.40 (m, 5H), 2.19-2.12 (m, 1H), 1.86-1.76 (m, 1H).

<sup>13</sup>C NMR (101 MHz, CDCl<sub>3</sub>): δ = 204.80, 149.90, 136.42, 130.02, 125.79, 118.76, 112.51, 46.09, 40.75, 26.11, 25.26, 22.95.

HRMS (ESI<sup>+</sup>): Exact mass calculated for C<sub>15</sub>H<sub>19</sub>NO (M)<sup>+</sup>: 229.1467, found: 229.1476

#### 4-(thiophen-3-yl)cyclohex-3-ene-1-carbaldehyde (**1i**)

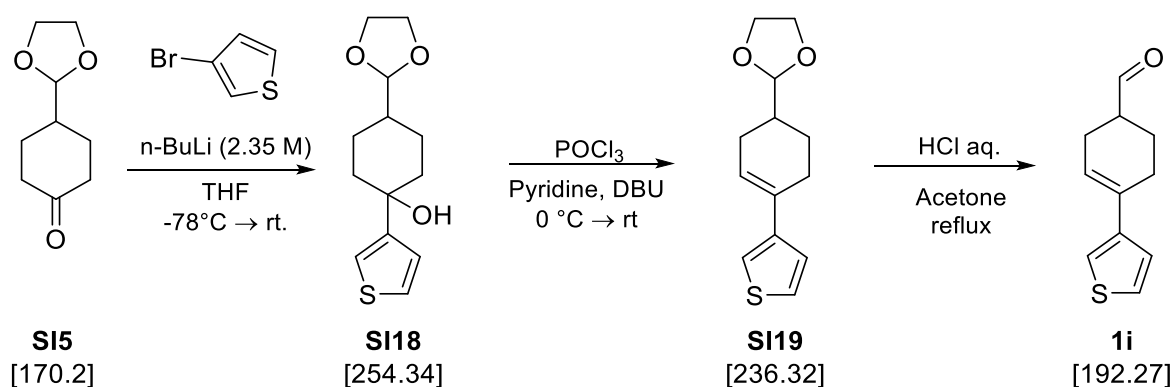

The product 4-(thiophen-3-yl)cyclohex-3-ene-1-carbaldehyde (**1i**) was obtained from 4-(1,3-dioxolan-2-yl)cyclohexan-1-one (**SI5**) without isolation of the intermediary products in steps one and two. In steps 2 and 3 reagents were used in excess based on the theoretical yield from the previous steps.

- Step:** All the glassware used was oven-dried overnight, dry THF was from the VAC solvent purifier system and the reaction was carried out under argon. 3-bromothiophene (330 μL, 574 mg, 3.52 mmol, 1 eq) was dissolved in 4 ml of THF and cooled to -78 °C. n-Butyllithium 2.35 M solution in hexane (1.65 ml, 3.87 mmol, 1.1 eq) was added and left to stir for 2 hours. 4-(1,3-dioxolan-2-yl)cyclohexan-1-one (**SI5**) (600 mg, 3.52 mmol, 1 eq) dissolved in 2 ml of THF was added to the mixture at -78 °C. The mixture was warmed to rt after which the reaction was quenched with 40 ml of saturated NH<sub>4</sub>Cl, extracted with 3 portions of 30 ml EtOAc. Combined organic phases were then washed with brine and dried over MgSO<sub>4</sub>.
- Step:** All the glassware used was oven-dried overnight, pyridine was dried with molecular sieves (4Å) and the reaction was carried out under argon. Crude (1 eq) from the previous step was dissolved in 5 ml of pyridine. POCl<sub>3</sub> (813 μL, 1.34 g, 8.72 mmol, 4 eq) was added with a syringe at 0 °C followed by the addition of DBU (325 μL, 332 mg, 2.18 mmol, 1 eq). The reaction mixture was stirred at room temperature for 5 h. Quenching was performed with 20 ml of water and extraction with 50 ml of EtOAc, followed by three water washings (90 ml) and a brine wash (30 ml). Organic layer was dried with MgSO<sub>4</sub>.
- Step:** Crude (1 eq) was dissolved in acetone (7 ml). A mixture of water (3.5 ml) and concentrated HCl (1 ml) was added, and the reaction was refluxed for 24 h. Quenching was performed with saturated solution of NaHCO<sub>3</sub> (30 ml), the aqueous layer was extracted three times with a total of 90 ml EtOAc. Combined organic phases were then washed with brine and dried over MgSO<sub>4</sub>. Crude product was purified by flash column chromatography (Hex/EtOAc 9/1) providing 4-(thiophen-3-yl)cyclohex-3-ene-1-carbaldehyde (**1i**) (187.9 mg, 0.97 mmol, 28%)

$^1\text{H NMR}$  (500 MHz,  $\text{CDCl}_3$ ):  $\delta$  = 9.75 (s, 1H), 7.24 – 6.91 (m, 3H), 6.18 (s, 1H), 2.63 – 2.40 (m, 5H), 2.20 – 2.11 (m, 1H), 1.88 – 1.77 (m, 1H).

$^{13}\text{C NMR}$  (126 MHz,  $\text{CDCl}_3$ ):  $\delta$  = 204.3, 143.1, 132.2, 125.6, 124.8, 121.2, 118.7, 45.9, 26.1, 24.9, 22.6.

HRMS ( $\text{ESI}^+$ ): Exact mass calculated for  $\text{C}_{11}\text{H}_{12}\text{OS}$  ( $\text{M}^+$ ): 192.0609, found: 192.0612

## Synthesis of aryl aldehydes (2c-i)

### [1,1'-biphenyl]-4-carbaldehyde (2c)

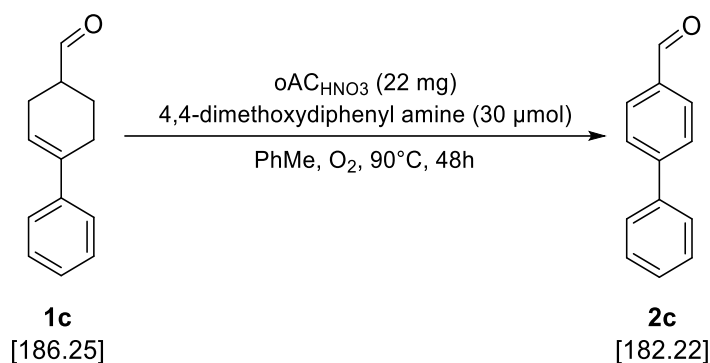

4-Phenyl-3-cyclohexene-1-carboxaldehyde (**1c**) (17.5 mg, 0.1 mmol, 1 eq), 4,4'-Dimethoxydiphenylamine (6.9 mg, 0.03 mmol, 0.3 eq) and  $\text{oAC}_{\text{HNO}_3}$  (21.5 mg) were mixed in 1 ml of toluene and sonicated for 5 minutes. The atmosphere was exchanged to pure oxygen and the mixture was stirred at  $90^\circ\text{C}$  for 48 h. Mixture was cooled down and filtered through Celite, then washed with 100 ml of DCM, and solvent was removed under reduced pressure. Flash chromatography purification (Hex/EtOAc 95/5  $\rightarrow$  9/1) provided [1,1'-biphenyl]-4-carbaldehyde (**2c**) (15.3 mg, 0.08 mmol, 89%) as a white solid.

$^1\text{H NMR}$  (400 MHz,  $\text{CDCl}_3$ ):  $\delta$  = 10.06 (s, 1H), 7.96 (d,  $J=8.6$  Hz, 2H), 7.76 (d,  $J=8.2$  Hz, 2H), 7.65 (d,  $J=7.0$  Hz, 2H), 7.49 (t,  $J=7.0$  Hz, 2H), 7.42 (m, 1H).

$^{13}\text{C NMR}$  (101 MHz,  $\text{CDCl}_3$ ):  $\delta$  = 192.0, 147.3, 139.9, 135.3, 130.4, 129.1, 128.6, 127.8, 127.5.

### 4-(naphthalen-1-yl) benzaldehyde (2d)

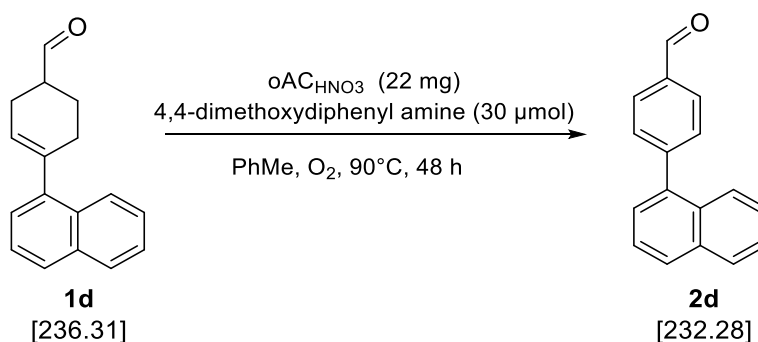

4-(naphthalen-1-yl)cyclohex-3-ene-1-carbaldehyde (**1d**) (22.6 mg, 0.1 mmol, 1 eq), 4,4'-Dimethoxydiphenylamine (9.2 mg, 0.03 mmol, 0.3 eq),  $\text{oAC}_{\text{HNO}_3}$  (25.2 mg) were mixed in 1 ml of toluene and sonicated for 5 minutes; the atmosphere was exchanged to pure oxygen and stirred at  $90^\circ\text{C}$  for 48 h. Mixture was cooled down and filtered through Celite, then washed with 100 ml of DCM, and solvent was removed under reduced pressure. Flash chromatography purification (Hex/EtOAc 95/5  $\rightarrow$  9/1) provided 4-(naphthalen-1-yl) benzaldehyde (**2d**) (17.7 mg, 0.08 mmol, 79%) as a white solid.

$^1\text{H NMR}$  (400 MHz,  $\text{CDCl}_3$ ):  $\delta$  = 10.13 (s, 1H), 8.02 (d,  $J$ =8.5 Hz, 2H), 7.93 (t,  $J$ =8.0 Hz, 2H), 7.84 (d,  $J$ =9.0 Hz, 1H), 7.68 (d,  $J$ =8.1 Hz, 2H), 7.57-7.43 (m, 4H).

$^{13}\text{C NMR}$  (101 MHz,  $\text{CDCl}_3$ ):  $\delta$  = 192.2, 147.4, 139.0, 135.5, 133.9, 131.3, 130.9, 129.9, 128.7, 128.6, 127.1, 126.6, 126.2, 125.6, 125.5.

#### 4'-(trifluoromethyl)-[1,1'-biphenyl]-4-carbaldehyde (**2e**)

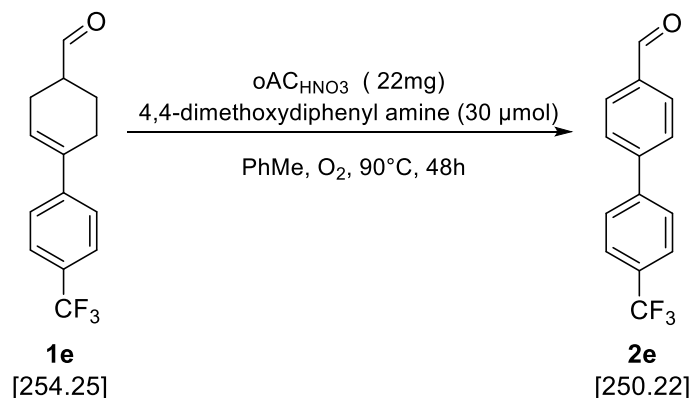

4'-(trifluoromethyl)-2,3,4,5-tetrahydro-[1,1'-biphenyl]-4-carbaldehyde (**1e**) (26.6 mg, 0.1 mmol, 1 eq), 4,4'-Dimethoxydiphenylamine (9.0 mg, 0.03 mmol, 0.3 eq),  $\text{oAC}_{\text{HNO}_3}$  (23.7 mg) were mixed in 1 ml of toluene and sonicated for 5 minutes; the atmosphere was exchanged to pure oxygen and stirred at  $90^\circ\text{C}$  for 48 h. Mixture was cooled down and filtered through Celite, then washed with 100 ml of DCM, and solvent was removed under reduced pressure. Flash chromatography purification (Hex/EtOAc 95/5  $\rightarrow$  9/1) provided 4'-(trifluoromethyl)-[1,1'-biphenyl]-4-carbaldehyde (**2e**) (20.0 mg, 0.08 mmol, 77%) as a pale-yellow solid.

$^1\text{H NMR}$  (400 MHz,  $\text{CDCl}_3$ ):  $\delta$  = 10.08 (s, 1H), 7.99 (d,  $J$  = 8.1 Hz, 2H), 7.78-7.74 (m, 6H).

$^{13}\text{C NMR}$  (101 MHz,  $\text{CDCl}_3$ ):  $\delta$  = 191.86, 145.70, 143.40, 136.01, 130.61 (q,  $J$  = 32.7 Hz,  $\text{CCF}_3$ ), 130.51, 128.07, 127.86, 126.10 (q,  $J$  = 3.8 Hz, CH), 124.22 (q,  $J$  = 272.1 Hz,  $\text{CF}_3$ ).

$^{19}\text{F NMR}$  (470 MHz,  $\text{CDCl}_3$ ):  $\delta$  = -62.58.

#### 3',4'-dimethoxy-[1,1'-biphenyl]-4-carbaldehyde (**2f**)

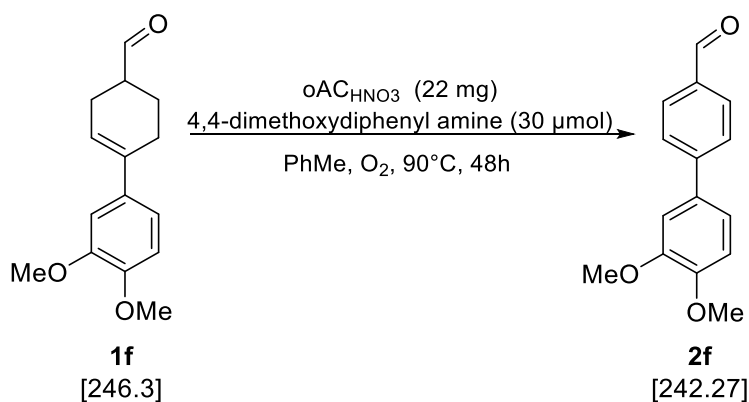

3',4'-dimethoxy-2,3,4,5-tetrahydro-[1,1'-biphenyl]-4-carbaldehyde (**1f**) (25.9 mg, 0.1 mmol, 1 eq), 4,4'-Dimethoxydiphenylamine (6.4 mg, 0.03 mmol, 0.3 eq),  $\text{oAC}_{\text{HNO}_3}$  (21.7 mg) were mixed in 1 ml of toluene and sonicated for 5 minutes; the atmosphere was exchanged to pure oxygen and stirred at  $90^\circ\text{C}$  for

48 h. Mixture was cooled down and filtered through Celite, then washed with 100 ml of DCM, and solvent was removed under reduced pressure. Flash chromatography purification (Hex/EtOAc 95/5 → 8/2) provided 3',4'-dimethoxy-[1,1'-biphenyl]-4-carbaldehyde (**2f**) (22,7 mg, 0.09 mmol, 89%) as a pale-yellow solid.

<sup>1</sup>H NMR (400 MHz, CDCl<sub>3</sub>): δ = 10,04 (s, 1H), 7.93 (d, *J*=8.5 Hz, 2H), 7.72 (d, *J*=8.4 Hz, 2H), 7.22 (dd, *J*=8.3, 2.1 Hz, 1H), 7.15 (d, *J*=2.3 Hz, 1H), 6.98 (d, *J*=8.4 Hz, 1H), 3.97 (s, 3H), 3.95 (s, 3H).

<sup>13</sup>C NMR (101 MHz, CDCl<sub>3</sub>): δ = 192.0, 149.8, 149.5, 147.2, 135.0, 132.7, 130.4, 127.4, 120.1, 111.7, 110.6, 56.2 (m, 2C).

### 3',5'-dimethyl-[1,1'-biphenyl]-4-carbaldehyde (**2g**)

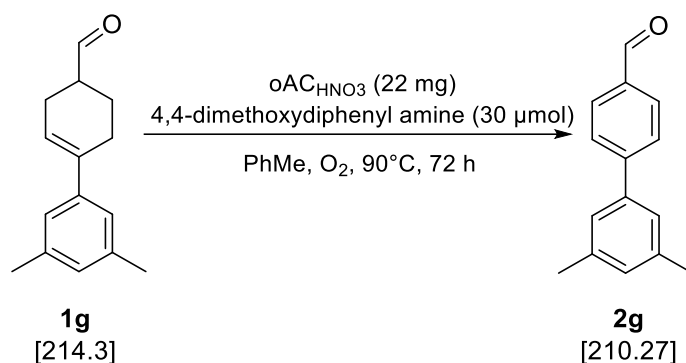

3',5'-dimethyl-2,3,4,5-tetrahydro-[1,1'-biphenyl]-4-carbaldehyde (**1g**) (22.8 mg, 0.1 mmol, 1 eq), 4,4'-Dimethoxydiphenylamine (6.5 mg, 0.03 mmol, 0.3 eq), *o*AcHNO<sub>3</sub> (21.0 mg) were mixed in 1 ml of toluene and sonicated for 5 minutes; the atmosphere was exchanged to pure oxygen and stirred at 90 °C for 72 h. Mixture was cooled down and filtered through Celite, then washed with 100 ml of DCM, and solvent was removed under reduced pressure. Flash chromatography purification (Hex/EtOAc 95/5 → 9/1) provided 3',5'-dimethyl-[1,1'-biphenyl]-4-carbaldehyde (**2g**) (10.3 mg, 0.05 mmol, 49%) as a white solid.

<sup>1</sup>H NMR (400 MHz, CDCl<sub>3</sub>): δ = 10.06 (s, 1H), 7.94 (d, *J*=8.6 Hz, 1H), 7.74 (d, *J*=8.3 Hz, 1H), 7.26 (s, 2H), 7.07 (s, 1H).

<sup>13</sup>C NMR (101 MHz, CDCl<sub>3</sub>): δ = 192.10, 147.66, 139.86, 138.73, 135.21, 130.32, 130.25, 127.83, 125.41, 21.52.

### 4'-(dimethylamino)-[1,1'-biphenyl]-4-carbaldehyde (**2h**)

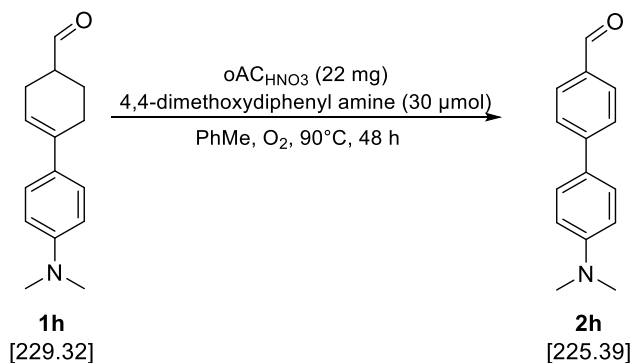

4'-(dimethylamino)-2,3,4,5-tetrahydro-[1,1'-biphenyl]-4-carbaldehyde (**1h**) (22.9 mg, 0.1 mmol, 1 eq), 4,4'-Dimethoxydiphenylamine (7.7 mg, 0.03 mmol, 0.3 eq),  $\text{oAC}_{\text{HNO}_3}$  (21.5 mg) were mixed in 1 ml of toluene and sonicated for 5 minutes; the atmosphere was exchanged to pure oxygen and stirred at 90 °C for 48 h. Mixture was cooled down and filtered through Celite, then washed with 100 ml of DCM, and solvent was removed under reduced pressure. NMR yield of 4'-(dimethylamino)-[1,1'-biphenyl]-4-carbaldehyde (**2h**) was 49%.

#### 4-(thiophen-3-yl)benzaldehyde (**2i**)

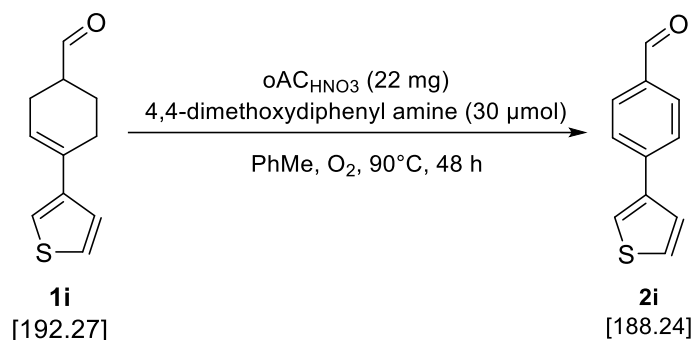

4-(thiophen-3-yl)cyclohex-3-ene-1-carbaldehyde (**1i**) (19.2 mg, 0.1 mmol, 1 eq), 4,4'-Dimethoxydiphenylamine (7.7 mg, 0.03 mmol, 0.3 eq),  $\text{oAC}_{\text{HNO}_3}$  (21.0 mg) were mixed in 1 ml of toluene and sonicated for 5 minutes; the atmosphere was exchanged to pure oxygen and stirred at 90 °C for 48 h. Mixture was cooled down and filtered through Celite, then washed with 100 ml of DCM, and solvent was removed under reduced pressure. NMR yield of 4-(thiophen-3-yl)benzaldehyde (**2i**) was 53%.

#### 4-(4-methylpent-3-en-1-yl)benzaldehyde (**SI21**)

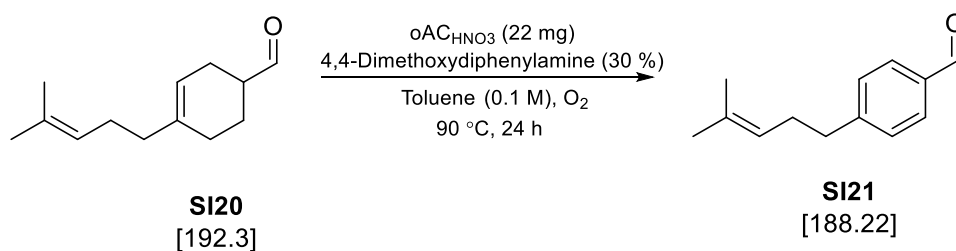

4-(4-methylpent-3-en-1-yl)cyclohex-3-ene-1-carbaldehyde (19.2 mg, 0.1 mmol, 1 eq), 4,4'-Dimethoxydiphenylamine (6.9 mg, 0.03 mmol, 0.3 eq),  $\text{oAC}_{\text{HNO}_3}$  (21.0 mg) were mixed in 1 ml of toluene and sonicated for 5 minutes; the atmosphere was exchanged to pure oxygen and stirred at 90 °C for 24 h. Mixture was cooled down and filtered through Celite, then washed with 100 ml of DCM, and solvent was removed under reduced pressure. NMR yield of **SI21** was 13% with 45% leftover starting material and about 15% of aldol condensation products.

## Computational supplementary information

All geometry optimizations were performed using the M06-2X functional<sup>8</sup> with Grimme's D3 dispersion correction (emp=GD3)<sup>9</sup> and the 6-31+G(d,p) basis set and the CPCM solvation model for toluene, as implemented in the *Gaussian 16* program package.<sup>10</sup> Transition-state (TS) structures were located using the Berny algorithm (calculated force constants), with initial guesses obtained from saddle-point distance scans. Intrinsic reaction coordinate (IRC) calculations were carried out for TS structures (one imaginary frequency) to verify their connectivity between reactants and products. Single-point energy and frequency calculations were performed at the same level of theory and solvation model using the larger 6-311++G(d,p) basis set. Cartesian coordinates (XYZ) of optimized structures are provided in separate files along with their free energies and, where applicable, imaginary frequencies for TS structures.

Phenanthrenequinone (PQ) was initially employed as an alternative quinoid model compound to evaluate oAC-driven dehydrogenative aromatization of enamines **1a-A4**, **1a-A6**, and **1a-morpholine** (Figs S5 and S6). Formation of the initial van der Waals encounter complex is computed to be slightly endergonic ( $\Delta G = +1.9$  to  $+3.7$  kcal mol<sup>-1</sup>). The calculated reaction profile indicates that the first transition state (TS1), corresponding to hydride abstraction by a quinone oxygen from the doubly allylic C2 position of the enamine, represents the highest free-energy barrier along an overall exergonic hydrodehydrogenation pathway.

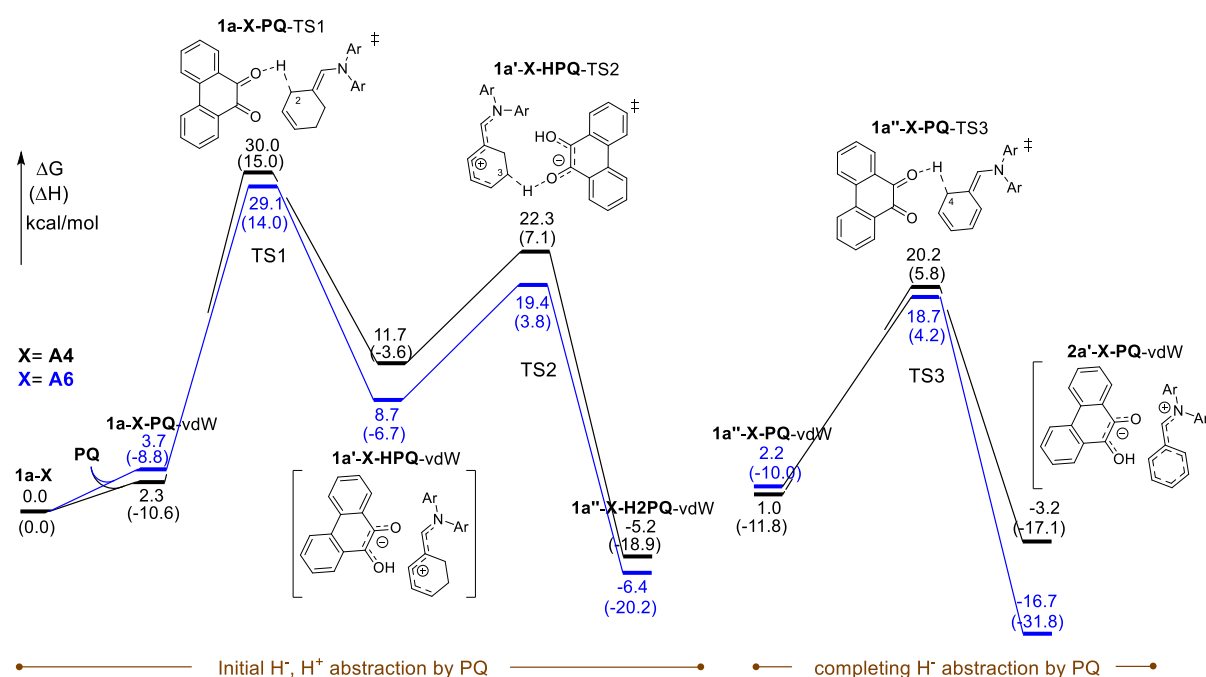

**Fig S8.** Aromatization energy profiles of enamines **1a-A4** and **1a-A6** via consecutive dehydrogenation and hydride-abstraction steps mediated by PQ. M062x/6-311++g(d,p)//M062x/6-31+g(d,p) CPCM(toluene) emp=gd3

**Table S11.** List of computed free energies ( $\Delta G$ ) and enthalpies ( $\Delta H$ ) M06-2x/6-311++(d,p)//M06-2x/6-31G+(d,p) GD3 CPCM(toluene).

| entry | Structure / complex             | $\Delta G$ (in a.u.) | $\Delta H$ (in a.u.) | i-freq   | name (XYZ)                      |
|-------|---------------------------------|----------------------|----------------------|----------|---------------------------------|
| 1     | 1a-A4                           | -789.761092          | -789.699541          |          | 1a-A4                           |
| 2     | PQ                              | -688.523883          | -688.474401          |          | PQ                              |
| 3     | 1a-A4-PQ-vdW                    | -1478.281247         | -1478.190800         |          | 1a-A4-PQ-vdW                    |
| 4     | 1a-A4-PQ-TS1                    | -1478.237161         | -1478.150077         | -1287.24 | 1a-A4-PQ-TS1                    |
| 5     | 1a'-A4-HPQ-vdW                  | -1478.266319         | -1478.179753         |          | 1a'-A4-HPQ-vdW                  |
| 6     | 1a'-A4-HPQ-TS2                  | -1478.249453         | -1478.162581         | -423.29  | 1a'-A4-HPQ-TS2                  |
| 7     | 1a''-A4-H <sub>2</sub> PQ-vdW   | -1478.293307         | -1478.204117         |          | 1a''-A4-H <sub>2</sub> PQ-vdW   |
| 8     | 1a''-A4-PQ-vdW                  | -1477.087278         | -1476.997218         |          | 1a''-A4-PQ-vdW                  |
| 9     | 1a''-A4-PQ-TS3                  | -1477.056739         | -1476.969112         | -1502.39 | 1a''-A4-PQ-TS3                  |
| 10    | 2a'-A4-HPQ-vdW                  | -1477.094002         | -1477.005499         |          | 2a'-A4-PQ-vdW                   |
| 11    | 1a-A6                           | -1018.72699          | -1018.653808         |          | 1a-A6                           |
| 12    | 1a-A6-PQ-vdW                    | -1707.24495          | -1707.142194         |          | 1a-A6-PQ-vdW                    |
| 13    | 1a-A6-PQ-TS1                    | -1707.204463         | -1707.105892         | -1312.48 | 1a-A6-PQ-TS1                    |
| 14    | 1a'-A6-HPQ-vdW                  | -1707.236962         | -1707.138846         |          | 1a'-A6-HPQ-vdW                  |
| 15    | 1a'-A6-HPQ-TS2                  | -1707.219905         | -1707.122213         | -1331.04 | 1a'-A6-HPQ-TS2                  |
| 16    | 1a''-A6-H <sub>2</sub> PQ-vdW   | -1707.260995         | -1707.160347         |          | 1a''-A6-H <sub>2</sub> PQ-vdW   |
| 17    | 1a''-A6-PQ-vdW                  | -1706.051775         | -1705.949302         |          | 1a''-A6-PQ-vdW                  |
| 18    | 1a''-A6-PQ-TS3                  | -1706.025408         | -1705.926542         | -1528.53 | 1a''-A6-PQ-TS3                  |
| 19    | 2a'-A6-PQ-vdW                   | -1706.081888         | -1705.984045         |          | 2a'-A6-PQ-vdW                   |
| 20    | Morpholine (Morp)               | -559.007374          | -558.957254          |          | Morp                            |
| 21    | 1a-Morp-PQ-vdW                  | -1247.528236         | -1247.449295         |          | 1a-Morp-PQ-vdW                  |
| 22    | 1a-Morp-PQ-TS1                  | -1247.483286         | -1247.406613         | -1286.42 | 1a-Morp-PQ-TS1                  |
| 23    | 1a'-Morp-HPQ-vdW                | -1247.519094         | -1247.441718         |          | 1a'-Morp-HPQ-vdW                |
| 24    | 1a'-Morp-HPQ-TS2                | -1247.503221         | -1247.427235         | -1455.29 | 1a'-Morp-HPQ-TS2                |
| 25    | 1a''-Morp-H <sub>2</sub> PQ-vdW | -1247.539611         | -1247.460600         |          | 1a''-Morp-H <sub>2</sub> PQ-vdW |
| 26    | 1a''-Morp-PQ-vdW                | -1246.332813         | -1246.252921         |          | 1a''-Morp-PQ-vdW                |
| 27    | 1a''-Morp-PQ-TS3                | -1246.302952         | -1246.225914         | -1477.57 | 1a''-Morp-PQ-TS3                |
| 28    | 2a'-Morp-HPQ-vdW                | -1246.371144         | -1246.295268         |          | 2a'-Morp-PQ-vdW                 |

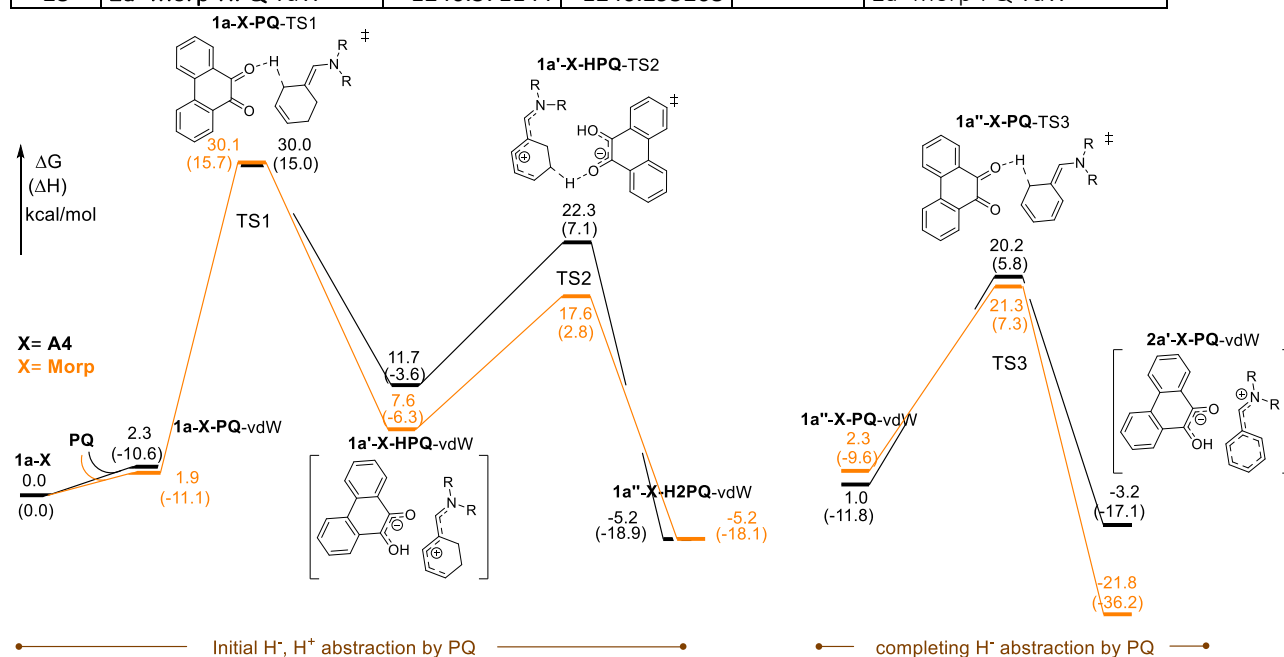

**Fig S9.** Aromatization energy profiles of enamines **1a-A4** and **1a-Morp** via consecutive dehydrogenation and hydride-abstraction steps mediated by PQ. M062x/6-311++g(d,p)//M062x/6-31g(d,p) CPCM(toluene) emp=gd3

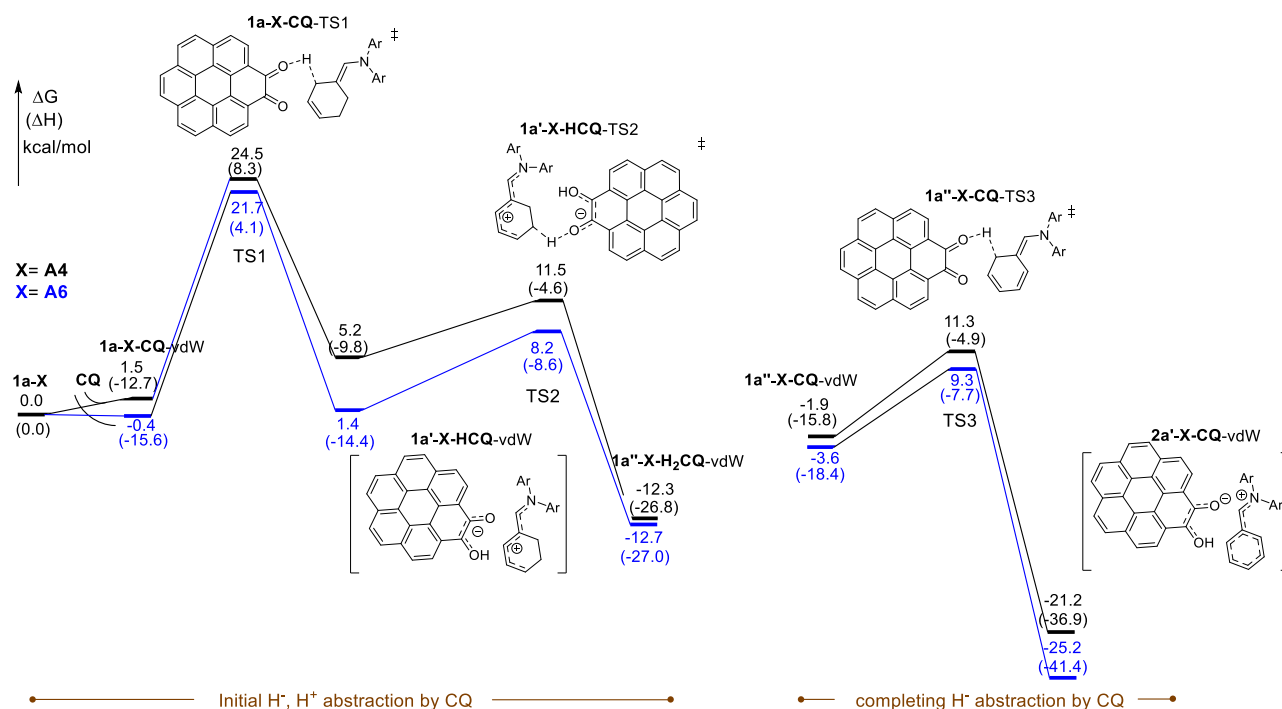

**Fig S10.** Aromatization energy profiles of enamines **1a-A4** and **1a-A6** via consecutive dehydrogenation and hydride-abstraction steps mediated by CQ. M062x/6-311++g(d,p)//M062x/6-31+g(d,p) CPCM(toluene) emp=gd3

**Table S12.** List of computed free energies ( $\Delta G$ ) and enthalpies ( $\Delta H$ ) M06-2x/6-311++(d,p)//M06-2x/6-31G+(d,p) GD3 CPCM(toluene).

| entry | Structure / complex                  | $\Delta G$ (in a.u.) | $\Delta H$ (in a.u.) | i-freq   | name (XYZ)                      |
|-------|--------------------------------------|----------------------|----------------------|----------|---------------------------------|
| 1     | CQ                                   | -1070.742663         | -1070.68342          |          | CQ                              |
| 2     | <b>1a-A4-CQ-vdW</b>                  | -1860.501289         | -1860.403127         |          | 1a-A4-CQ-vdW                    |
| 3     | <b>1a-A4-CQ-TS1</b>                  | -1860.464669         | -1860.369655         | -1456.62 | 1a-A4-CQ-TS1                    |
| 4     | <b>1a'-A4-HCQ-vdW</b>                | -1860.495473         | -1860.398623         |          | 1a'-A4-HCQ-vdW                  |
| 5     | <b>1a'-A4-HCQ-TS2</b>                | -1860.485421         | -1860.39024          | -1336.96 | 1a'-A4-HCQ-TS2                  |
| 6     | <b>1a''-A4-H<sub>2</sub>CQ-vdW</b>   | -1860.523306         | -1860.425718         |          | 1a''-A4-H <sub>2</sub> CQ-vdW   |
| 7     | <b>1a''-A4-CQ-vdW</b>                | -1859.310739         | -1859.212509         |          | 1a''-A4-CQ-vdW                  |
| 8     | <b>1a''-A4-CQ-TS3</b>                | -1859.289747         | -1859.195294         | -1356.40 | 1a''-A4-CQ-TS3                  |
| 9     | <b>2a'-A4-HCQ-vdW</b>                | -1859.341489         | -1859.246269         |          | 2a'-A4-HCQ-vdW                  |
| 10    | <b>1a-A6-CQ-vdW</b>                  | -2089.470307         | -2089.362039         |          | 1a-A6-CQ-vdW                    |
| 11    | <b>1a-A6-CQ-TS1</b>                  | -2089.43509          | -2089.330631         | -1490.09 | 1a-A6-CQ-TS1                    |
| 12    | <b>1a'-A6-HCQ-vdW</b>                | -2089.467378         | -2089.360191         |          | 1a'-A6-HCQ-vdW                  |
| 13    | <b>1a'-A6-HCQ-TS2</b>                | -2089.45666          | -2089.350863         | -1391.46 | 1a'-A6-HCQ-TS2                  |
| 14    | <b>1a''-A6-H<sub>2</sub>CQ-vdW</b>   | -2089.48994          | -2089.38032          |          | 1a''-A6-H <sub>2</sub> CQ-vdW   |
| 15    | <b>1a''-A6-CQ-vdW</b>                | -2088.279847         | -2088.171626         |          | 1a''-A6-CQ-vdW                  |
| 16    | <b>1a''-A6-CQ-TS3</b>                | -2088.259241         | -2088.154591         | -1321.56 | 1a''-A6-CQ-TS3                  |
| 17    | <b>2a'-A6-HCQ-vdW</b>                | -2088.314121         | -2088.208251         |          | 2a'-A6-HCQ-vdW                  |
| 18    | CQCA                                 | -1259.302572         | -1259.236757         |          | CQCA                            |
| 19    | <b>1a-A4-CQCA-vdW</b>                | -2049.062207         | -2048.957115         |          | 1a-A4-CQCA-vdW                  |
| 20    | <b>1a-A4-CQCA-TS1</b>                | -2049.026076         | -2048.925382         | -1492.79 | 1a-A4-CQCA-TS1                  |
| 21    | <b>1a'-A4-HCQCA-vdW</b>              | -2049.05789          | -2048.954228         |          | 1a'-A4-HCQCA-vdW                |
| 22    | <b>1a'-A4-HCQCA-TS2</b>              | -2049.049101         | -2048.946846         | -1341.97 | 1a'-A4-HCQCA-TS2                |
| 23    | <b>1a''-A4-H<sub>2</sub>CQCA-vdW</b> | -2049.086005         | -2048.981232         |          | 1a''-A4-H <sub>2</sub> CQCA-vdW |
| 24    | <b>1a''-A4-CQCA-vdW</b>              | -2047.871969         | -2047.766492         |          | 1a''-A4-CQCA-vdW                |

|    |                                   |              |              |          |                                   |
|----|-----------------------------------|--------------|--------------|----------|-----------------------------------|
| 25 | 1a''-A4-CQCA-TS3                  | -2047.851029 | -2047.749957 | -1278.72 | 1a''-A4-CQCA-TS3                  |
| 26 | 2a'-A4-HCQCA-vdW                  | -2047.904525 | -2047.802139 |          | 2a'-A4-HCQCA-vdW                  |
| 27 | 1a-A6-CQCA-vdW                    | -2278.031144 | -2277.916496 |          | 1a-A6-CQCA-vdW                    |
| 28 | 1a-A6-CQCA-TS1                    | -2277.99791  | -2277.887575 | -1495.67 | 1a-A6-CQCA-TS1                    |
| 29 | 1a'-A6-HCQCA-vdW                  | -2278.032028 | -2277.918503 |          | 1a'-A6-HCQCA-vdW                  |
| 30 | 1a'-A6-HCQCA-TS2                  | -2278.021323 | -2277.909795 | -1404.84 | 1a'-A6-HCQCA-TS2                  |
| 31 | 1a''-A6-H <sub>2</sub> CQCA-vdW   | -2278.053124 | -2277.938996 |          | 1a''-A6-H <sub>2</sub> CQCA-vdW   |
| 32 | 1a''-A6-CQCA-vdW                  | -2276.842163 | -2276.725097 |          | 1a''-A6-CQCA-vdW                  |
| 33 | 1a''-A6-CQCA-TS3                  | -2276.825936 | -2276.716496 | -1232.08 | 1a''-A6-CQCA-TS3                  |
| 34 | 2a'-A6-HCQCA-vdW                  | -2276.877428 | -2276.765767 |          | 2a'-A6-HCQCA-vdW                  |
| 35 | 1a-Morp-CQ-vdW                    | -1629.749572 | -1629.662616 |          | 1a-Morp-CQ-vdW                    |
| 36 | 1a-Morp-CQ-TS1                    | -1629.714742 | -1629.630423 | -1473.16 | 1a-Morp-CQ-TS1                    |
| 37 | 1a'-Morp-HCQ-vdW                  | -1629.74598  | -1629.6596   |          | 1a'-Morp-HCQ-vdW                  |
| 38 | 1a'-Morp-HCQ-TS2                  | -1629.734666 | -1629.648723 | -1390.29 | 1a'-Morp-HCQ-TS2                  |
| 39 | 1a''-Morp-H <sub>2</sub> CQ-vdW   | -1629.768577 | -1629.68094  |          | 1a''-Morp-H <sub>2</sub> CQ-vdW   |
| 40 | 1a''-Morp-CQ-vdW                  | -1628.558037 | -1628.47197  |          | 1a''-Morp-CQ-vdW                  |
| 41 | 1a''-Morp-CQ-TS3                  | -1628.543403 | -1628.46022  | -1226.60 | 1a''-Morp-CQ-TS3                  |
| 42 | 2a'-Morp-HCQ-vdW                  | -1628.594144 | -1628.509837 |          | 2a'-Morp-HCQ-vdW                  |
| 43 | 1a-Morp-CQCA-vdW                  | -1818.309944 | -1818.216339 |          | 1a-Morp-CQCA-vdW                  |
| 44 | 1a-Morp-CQCA-TS1                  | -1818.275571 | -1818.184454 | -1474.20 | 1a-Morp-CQCA-TS1                  |
| 45 | 1a'-Morp-HCQCA-vdW                | -1818.307666 | -1818.214559 |          | 1a'-Morp-HCQCA-vdW                |
| 46 | 1a'-Morp-HCQCA-TS2                | -1818.295689 | -1818.203476 | -1398.93 | 1a'-Morp-HCQCA-TS2                |
| 47 | 1a''-Morp-H <sub>2</sub> CQCA-vdW | -1818.330024 | -1818.235631 |          | 1a''-Morp-H <sub>2</sub> CQCA-vdW |
| 48 | 1a''-Morp-CQCA-vdW                | -1817.118242 | -1817.02556  |          | 1a''-Morp-CQCA-vdW                |
| 49 | 1a''-Morp-CQCA-TS3                | -1817.104173 | -1817.014387 | -1190.89 | 1a''-Morp-CQCA-TS3                |
| 50 | 2a'-Morp-HCQCA-vdW                | -1817.155903 | -1817.06492  |          | 2a'-Morp-HCQCA-vdW                |

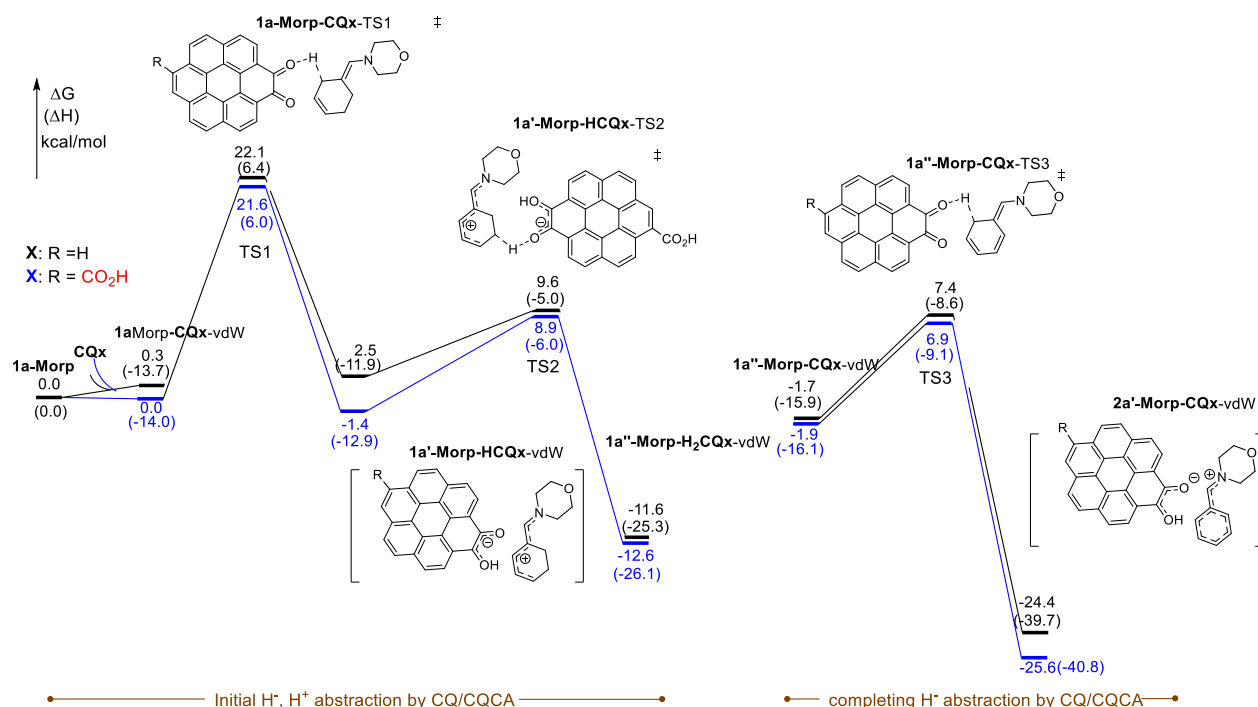

**Fig S11.** Aromatization energy profiles of enamine **1a-Morp** via consecutive dehydrogenation and hydride-abstraction steps mediated by CQ or COCA. M062x/6-311++g(d,p)//M062x/6-31+g(d,p) CPCM(toluene) emp=gd3

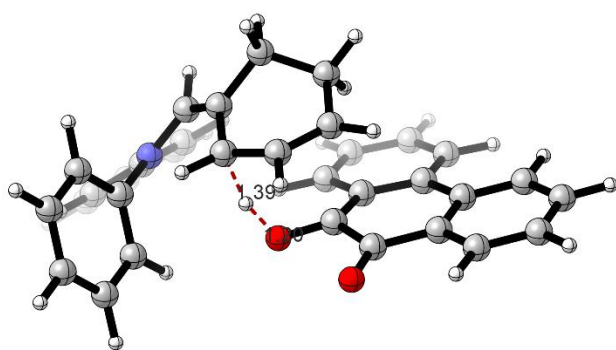

1a-A4-PQ-TS1

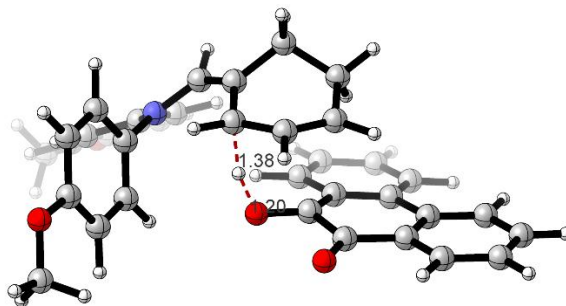

1a-A6-PQ-TS1

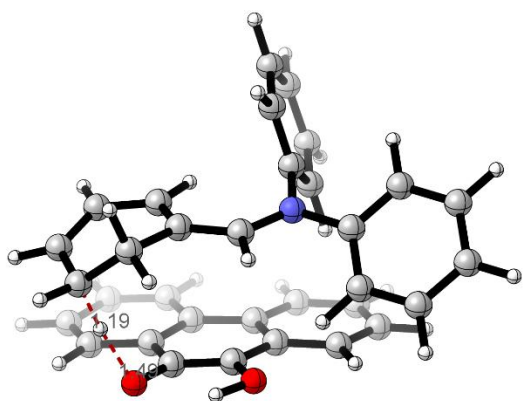

1a-A4-PQ-TS2

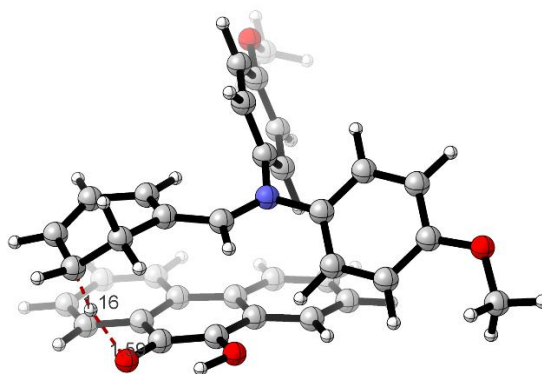

1a-A6-PQ-TS2

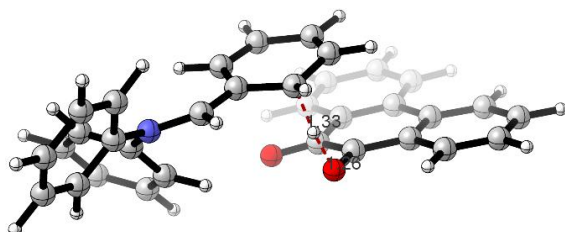

1a-A4-PQ-TS3

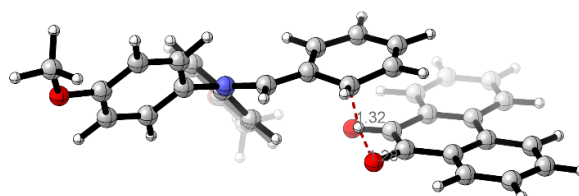

1a-A6-PQ-TS3

# Frontier molecular orbitals of van der Waals complexes

## Enamine on CQCA

### A) 1a-A4-CQCA

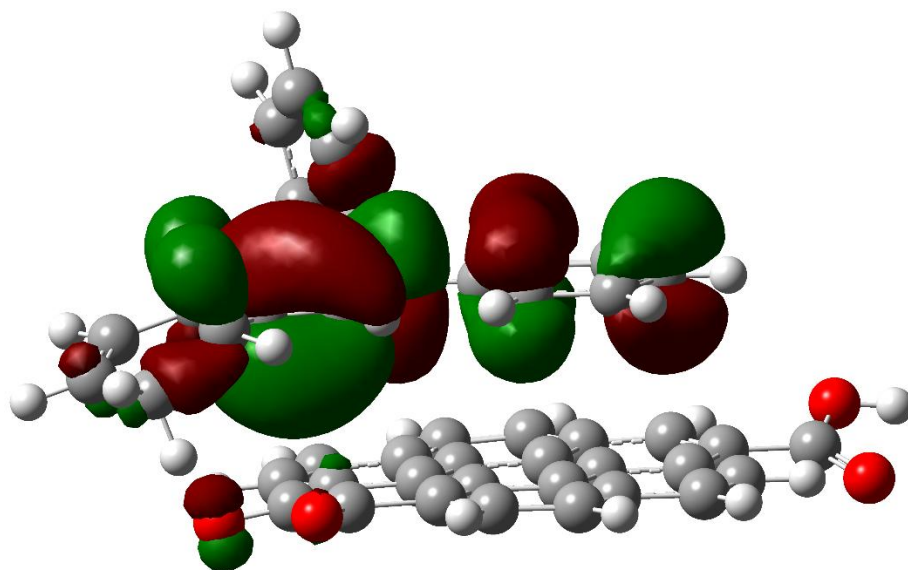

HOMO -6.472 eV

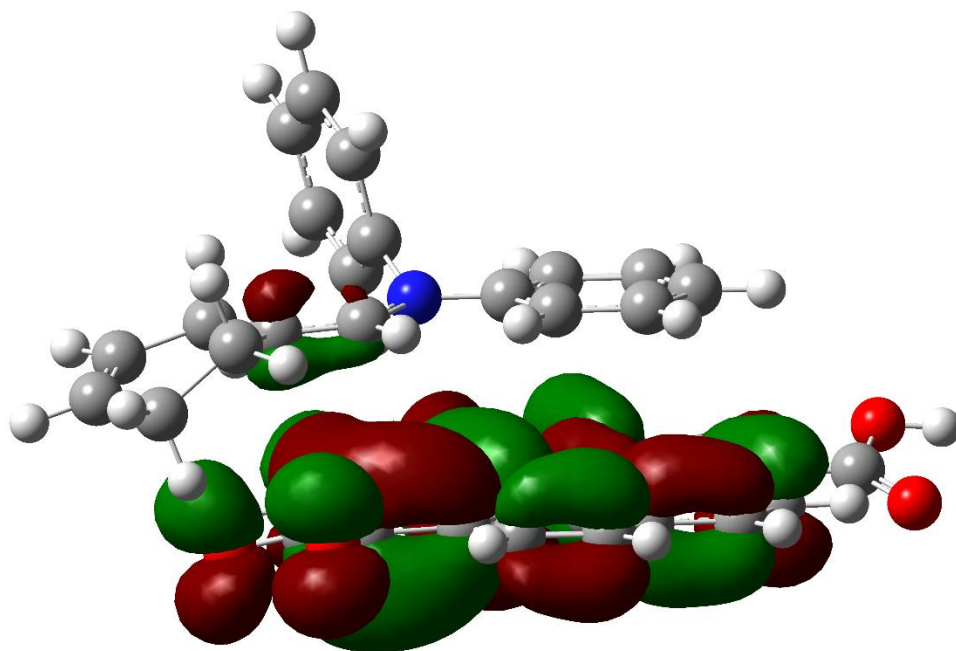

LUMO -2.667 eV

MO gap= 3.805

NBO charge -0.0150 CQCA +0.015 enamine

B) 1a-A6-CQCA

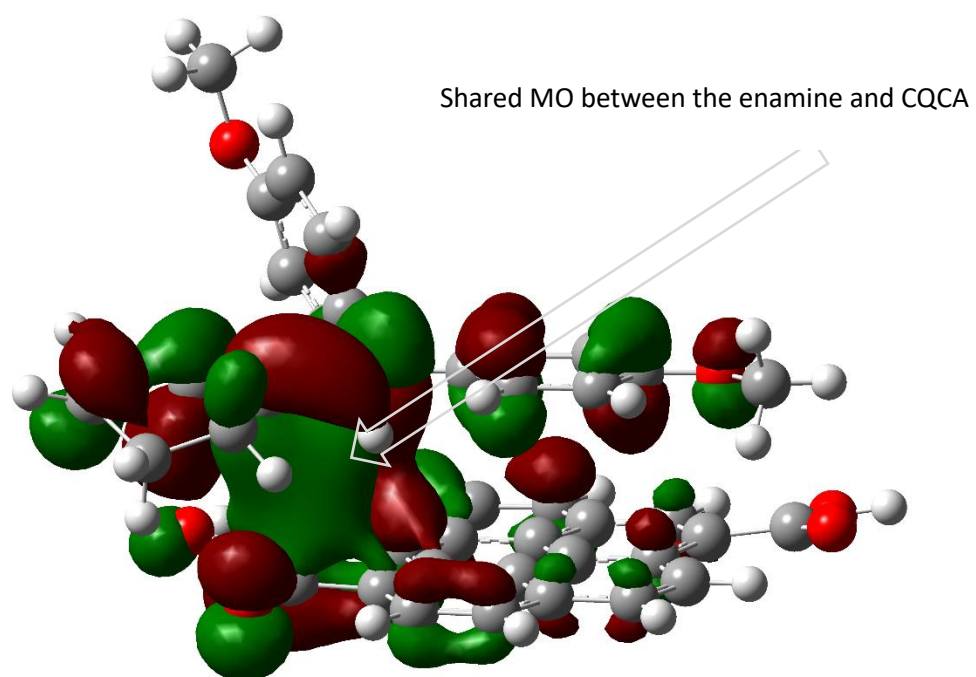

HOMO -6.264 eV

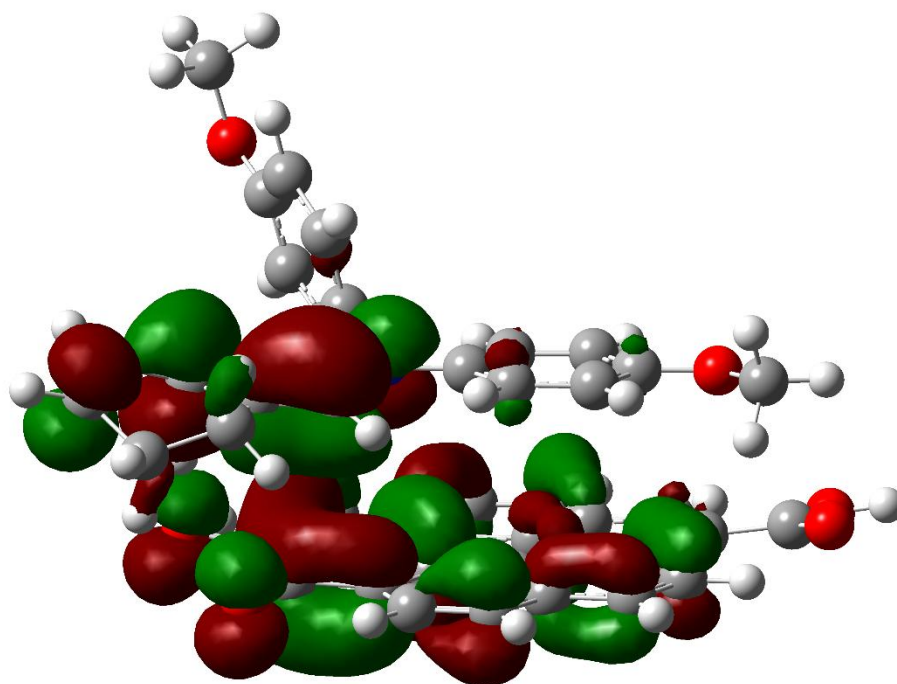

LUMO -2.631 eV MO gap= 3.633

NBO charge -0.03539 CQCA +0.03539 enamine

-Strong ground state electronic coupling:  $\pi$ - $\pi$ -stacking with some charge transfer character

## NCI plots

NCI plot visualization (with VMD) of TS1 and vdW structures of **1a-A4** and **1a-A6** with CQCA. In G16 optimizations a name.wfx output file was requested the in-keyword list (output.wfx). Fine resolution was used in the NCI plot software<sup>11</sup> to generate name-grad-cube, name-dens.cube and name.vmd files. These files were used in VMD<sup>12</sup> visualization software for plotting of noncovalent interactions (with default graphical presentation parameters).

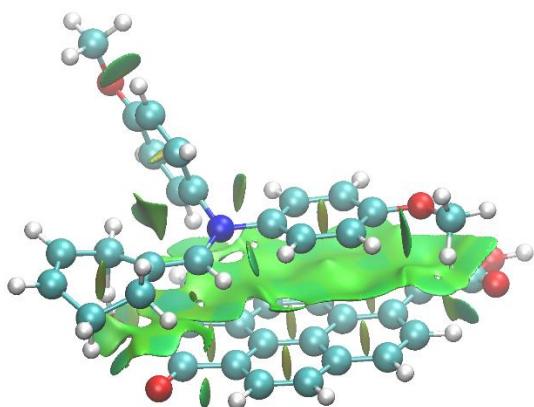

**1a-A6-CQCA-TS1**

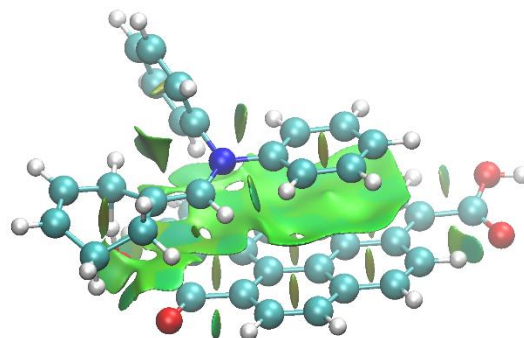

**1a-A4- CQCA TS1**

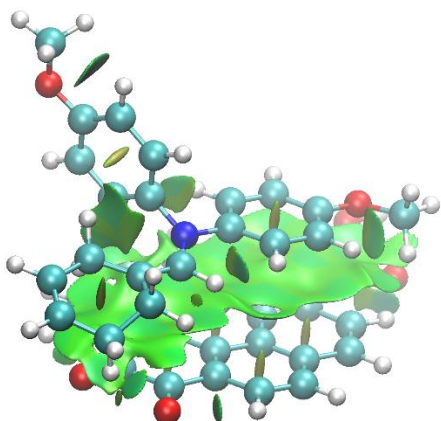

**1a-A6- CQCA vdW**

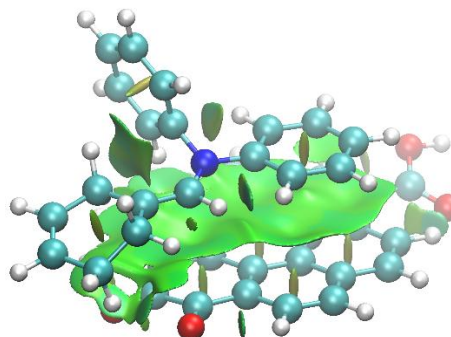

**1a-A4-CQCA vdW**

## SET and HAT study

For comparison, the Gibbs free energies of single-electron transfer (SET) and hydrogen atom transfer (HAT) processes were calculated between enamines (**1a-A4**, **1a-A6**, and **1a-Morp**) and quinonoid models (PQ, CQ, and CQCA) (Table S8). The SET processes were found to be highly endergonic, with energies ranging from 56.0 to 67.1 kcal/mol, depending on the enamine and quinone model employed. The corresponding HAT processes were also endergonic, though significantly less so, with energies in the range of 10.7–13.8 kcal/mol. In contrast, the thermodynamically favorable pathway proceeds via ionic complexes formed between cationic intermediates and hydroquinone anions, which were calculated to be exergonic (Figs. 4 and S8).

**Table S13.** Enamine SET and HAT reaction Gibbs free energies by PQ, CQ, CQCA, respectively. (kcal/mol (M06-2x/6-311++g(d,p)//M062x/6-31+g(d,p) CPCM(toluen) emp=gd3))

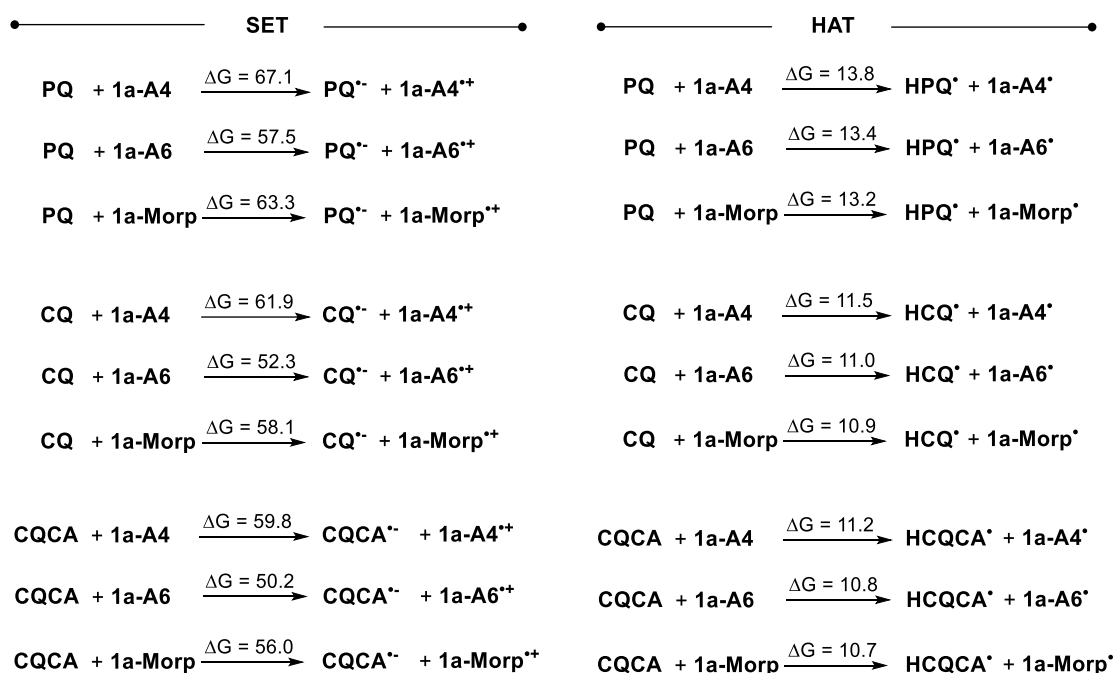

**Table S14.** Calculated energetics of open-shell intermediates associated with SET and HAT processes (Table S8). (M06-2x/6-311++g(d,p)//M062x/6-31+g(d,p) CPCM(toluen) emp=gd3))

| Entry | Structure             | $\Delta G$ (in a.u.) | $\Delta H$ (in a.u.) | name (XYZ)* |
|-------|-----------------------|----------------------|----------------------|-------------|
| 1     | PQ <sup>•-</sup>      | -688.638873          | -688.588594          | PQ-rA       |
| 2     | CQ <sup>•-</sup>      | -1070.865864         | -1070.806099         | CQ-rA       |
| 3     | CQCA <sup>•-</sup>    | -1259.42918          | -1259.362903         | CQCA-rA     |
| 4     | 1a-A4 <sup>•+</sup>   | -789.539215          | -789.476859          | 1a-A4-rK    |
| 5     | 1a-A6 <sup>•+</sup>   | -1018.52044          | -1018.447441         | 1a-A6-rK    |
| 6     | 1a-Morp <sup>•+</sup> | -558.791537          | -558.740493          | 1a-Morp-rK  |
| 7     | HPQ <sup>•</sup>      | -689.117983          | -689.067954          | HPQ-r       |
| 8     | HCQ <sup>•</sup>      | -1071.340471         | -1071.28087          | HCQ-r       |
| 9     | HCQCA <sup>•</sup>    | -1259.900761         | -1259.834573         | HCQCA-r     |
| 10    | 1a-A4 <sup>•</sup>    | -789.145005          | -789.083088          | 1a-A4-r     |
| 11    | 1a-A6 <sup>•</sup>    | -1018.111584         | -1018.038255         | 1a-A6-r     |
| 12    | 1a-Morp <sup>•</sup>  | -558.3922            | -558.341652          | 1a-Morp-r   |

\*rA= radical anion, rK= radical cation, r=neutral radical

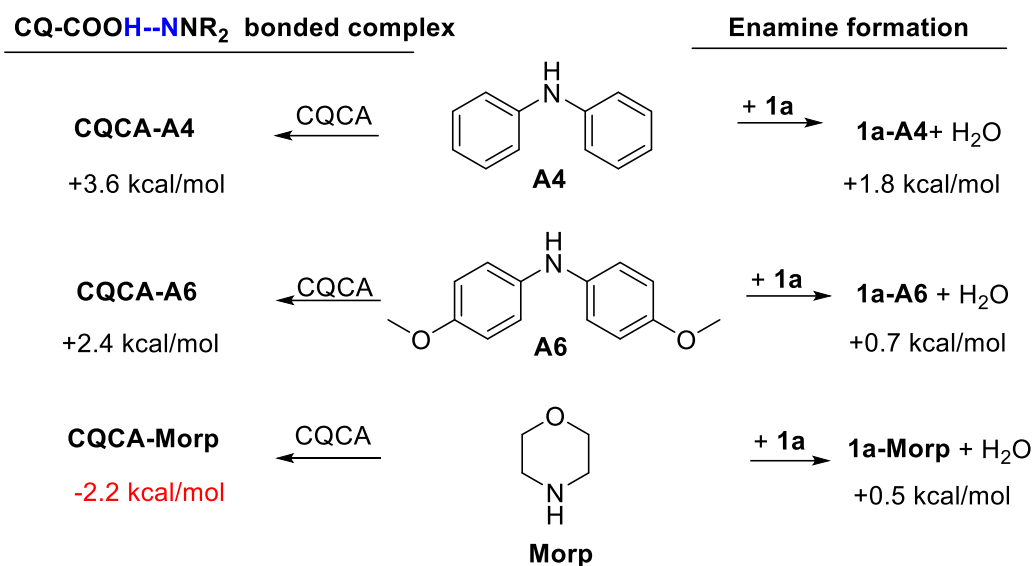

**Figure S12.** Free energies comparing enamine formation and competing H-bonded acid–side-complex formation with CQCA (Table S10).

Thermodynamics for amine organo-co-catalysis (with **A4**, **A6** and morpholine) were computed, both for enamine formation with **1a** and for H-bonded acid complex formation with **CQCA** (Figure S9, Table S10). Strikingly, the latter is exergonic only for morpholine ( $\Delta G = -2.2 \text{ kcal mol}^{-1}$ ), whereas it is endergonic for the diarylamines ( $\Delta G = +3.6$  and  $+2.4 \text{ kcal mol}^{-1}$  for **A4** and **A6**, respectively). This suggests that morpholine is prone to act as a Brønsted base under the reaction conditions, which may explain its sluggish catalytic performance.

**Table S15.** Calculated energetics enamine formation and the competing H-bonded acid–side-complex formation with CQCA for Figure S9.

| Entry | Structure                             | $\Delta G$ (in a.u.) | $\Delta H$ (in a.u.) | name (XYZ)*            |
|-------|---------------------------------------|----------------------|----------------------|------------------------|
| 1     | morpholine                            | -287.647312          | -287.612854          | Morp                   |
| 2     | <b>A4</b> (NHPPh <sub>2</sub> )       | -518.403060          | -518.355531          | <b>A4</b>              |
| 3     | <b>A6</b> (NH(4-OMePh) <sub>2</sub> ) | -747.367221          | -747.308515          | <b>A6</b>              |
| 4     | <b>1a</b>                             | -347.782434          | -347.742450          | <b>1a</b>              |
| 5     | H <sub>2</sub> O                      | -76.42156            | -76.4001             | H <sub>2</sub> O       |
| 6     | Morp-CQCA-H-bond                      | -1546.953461         | -1546.87163          | Morph-CQCA-H-bond      |
| 7     | <b>A4</b> -CQCA-H-bond                | -1777.699844         | -1777.60555          | <b>A4</b> -CQCA-H-bond |
| 8     | <b>A6</b> -CQCA-H-bond                | -2006.665963         | -2006.56057          | <b>A6</b> -CQCA-H-bond |

## References

- 1 a) T. Wirtanen, M. K. Mäkelä, J. Sarfraz, P. Ihalainen, S. Hietala, M. Melchionna and J. Helaja, *Adv. Synth. Catal.*, 2015, **357**, 3718–3726; b) A. Lenarda, M. Melchionna, S. Aikonen, T. Montini, P. Fornasiero, T. Hu, M. Hummel and J. Helaja, *ACS Catal.*, 2023, **13**, 11362–11375;
- 2 J. L. Figueiredo and M. F. R. Pereira, *Catal. Today*, 2010, **150**, 2–7.
- 3 W. Qi, W. Liu, B. Zhang, X. Gu, X. Guo and D. Su, *Angew. Chem. Int. Ed.*, 2013, **52**, 14224–14228.
- 4 H. Shigehisa, T. Mizutani, S. Tosaki, T. Ohshima and M. Shibasaki, *Tetrahedron*, 2005, **61**, 5057–5065.
- 5 A. X. Gao, T. Hamada and S. A. Snyder, *Angew. Chem. Int. Ed.*, 2016, **55**, 10301–10306.
- 6 G. M. Caballero and E. G. Gros, *Synth. Commun.*, 1995, **25**, 395–404.

- 7 L. Zhou, X. Liu, J. Ji, Y. Zhang, X. Hu, L. Lin and X. Feng, *J. Chem. Phys.*, 2012, **134**, 17023–17026.
- 8 Y. Zhao and D. G. Truhlar, *Theor Chem Account*, 2008, **120**, 215–241.
- 9 S. Grimme, J. Antony, S. Ehrlich and H. Krieg, *J. Chem. Phys.*, 2010, **132**, 154104.
- 10 Gaussian 16, Revision C.02, M. J. Frisch, G. W. Trucks, H. B. Schlegel, G. E. Scuseria, M. A. Robb, J. R. Cheeseman, G. Scalmani, V. Barone, G. A. Petersson, H. Nakatsuji, X. Li, M. Caricato, A. V. Marenich, J. Bloino, B. G. Janesko, R. Gomperts, B. Mennucci, H. P. Hratchian, J. V. Ortiz, A. F. Izmaylov, J. L. Sonnenberg, D. Williams-Young, F. Ding, F. Lipparini, F. Egidi, J. Goings, B. Peng, A. Petrone, T. Henderson, D. Ranasinghe, V. G. Zakrzewski, J. Gao, N. Rega, G. Zheng, W. Liang, M. Hada, M. Ehara, K. Toyota, R. Fukuda, J. Hasegawa, M. Ishida, T. Nakajima, Y. Honda, O. Kitao, H. Nakai, T. Vreven, K. Throssell, J. A. Montgomery, Jr., J. E. Peralta, F. Ogliaro, M. J. Bearpark, J. J. Heyd, E. N. Brothers, K. N. Kudin, V. N. Staroverov, T. A. Keith, R. Kobayashi, J. Normand, K. Raghavachari, A. P. Rendell, J. C. Burant, S. S. Iyengar, J. Tomasi, M. Cossi, J. M. Millam, M. Klene, C. Adamo, R. Cammi, J. W. Ochterski, R. L. Martin, K. Morokuma, O. Farkas, J. B. Foresman, and D. J. Fox, Gaussian, Inc., Wallingford CT, 2019.
- 11 a) J. Contreras-García, E. R. Johnson, S. Keinan, R. Chaudret, J.-P. Piquemal, D. N. Beratan and W. Yang, *J. Chem. Theory Comput.*, 2011, **7**, 625–632; b) E. R. Johnson, S. Keinan, P. Mori-Sánchez, J. Contreras-García, A. J. Cohen and W. Yang, *J. Am. Chem. Soc.*, 2010, **132**, 6498–6506;
- 12 W. Humphrey, A. Dalke and K. Schulten, *J. Mol. Graph.*, 1996, **14**, 33-8, 27-8.

# Copies of NMR spectra

<sup>1</sup>H NMR (400 MHz, CDCl<sub>3</sub>): S12

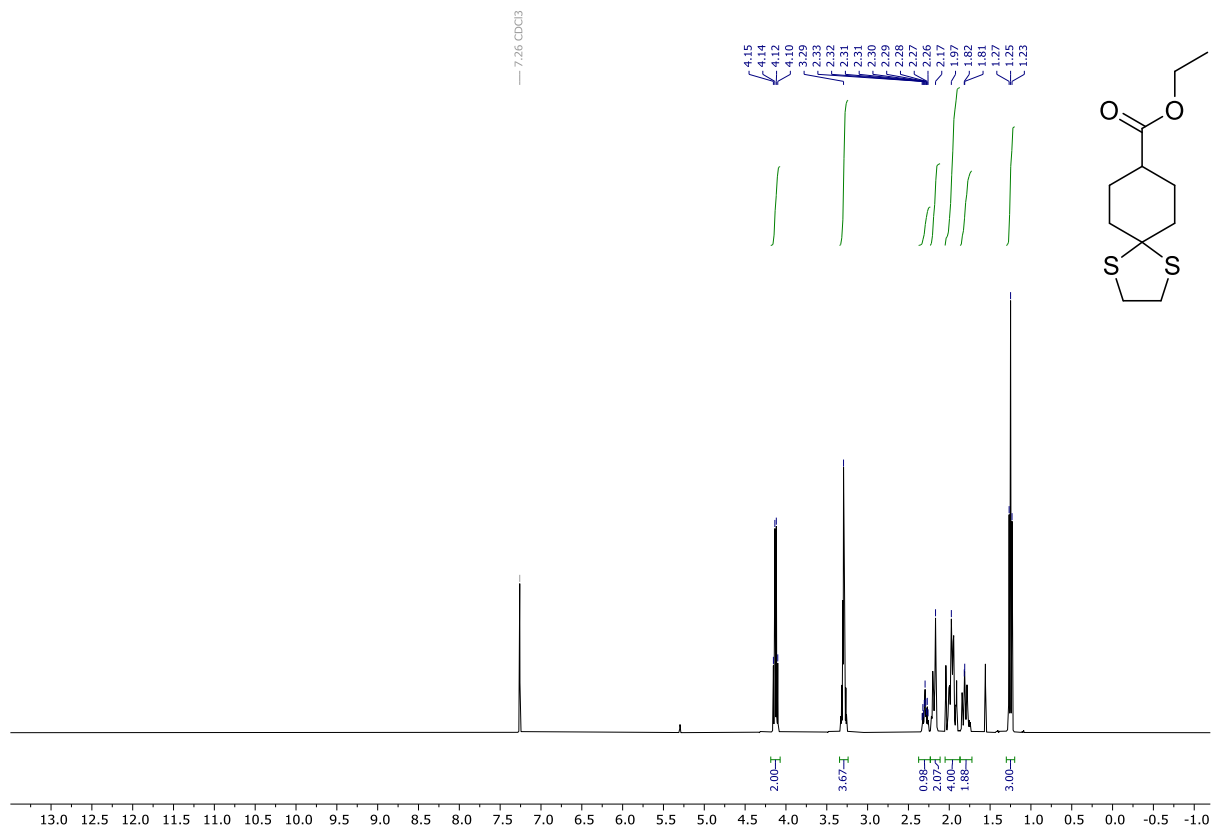

<sup>13</sup>C NMR (101 MHz, CDCl<sub>3</sub>): S12

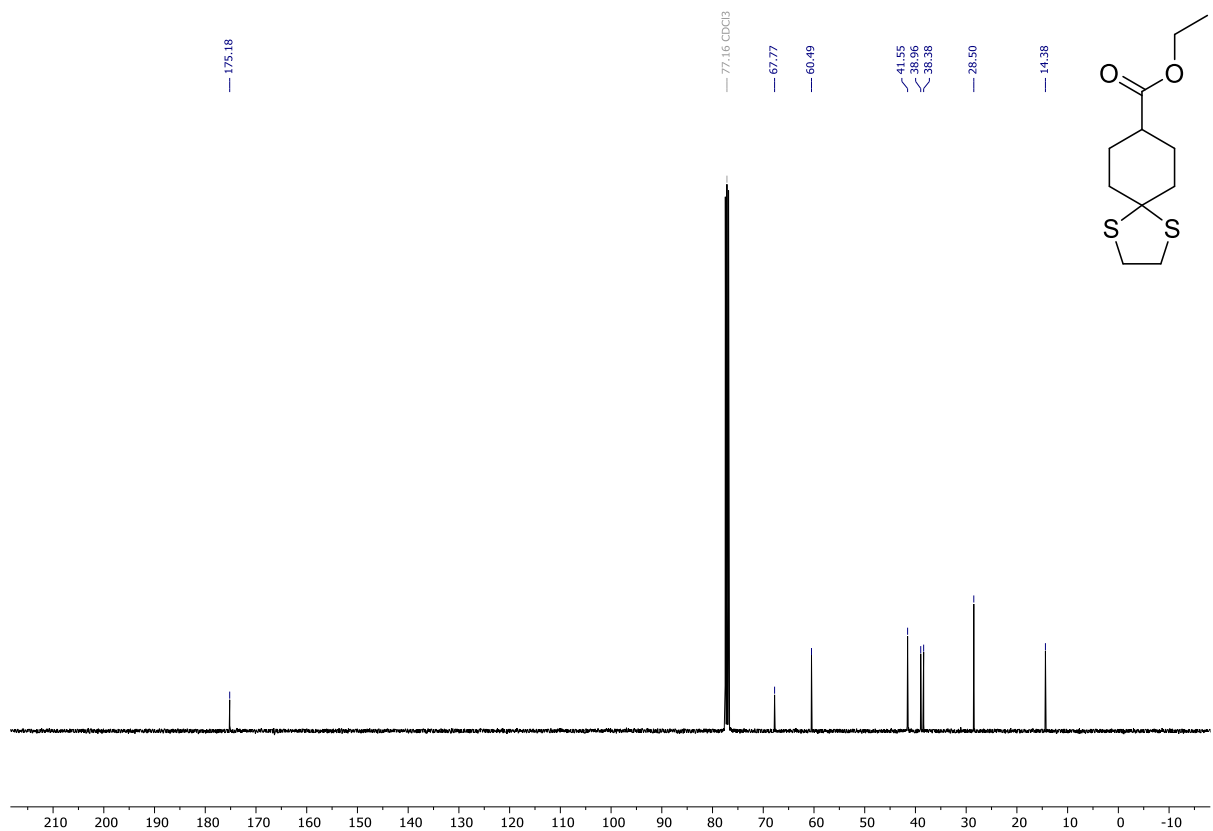

**<sup>1</sup>H NMR (400 MHz, CDCl<sub>3</sub>): S13**

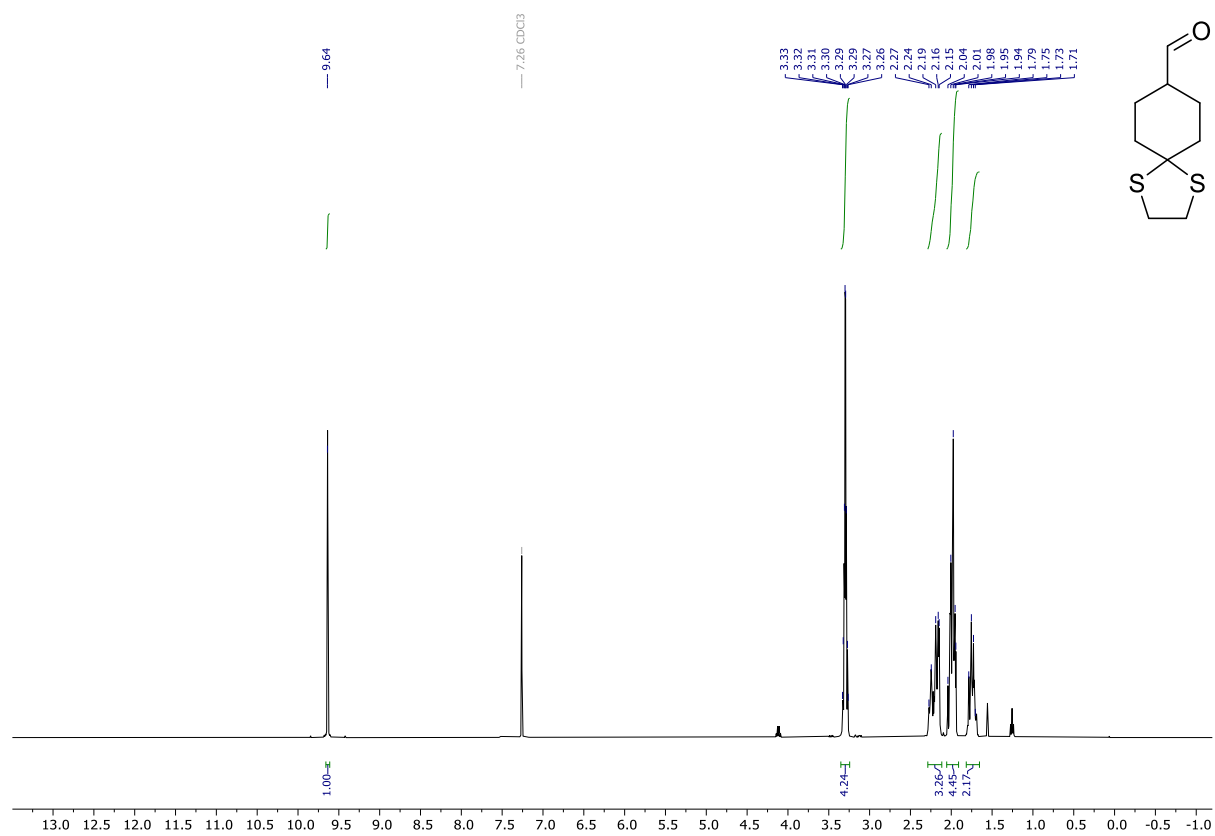

**<sup>13</sup>C NMR (101 MHz, CDCl<sub>3</sub>): S13**

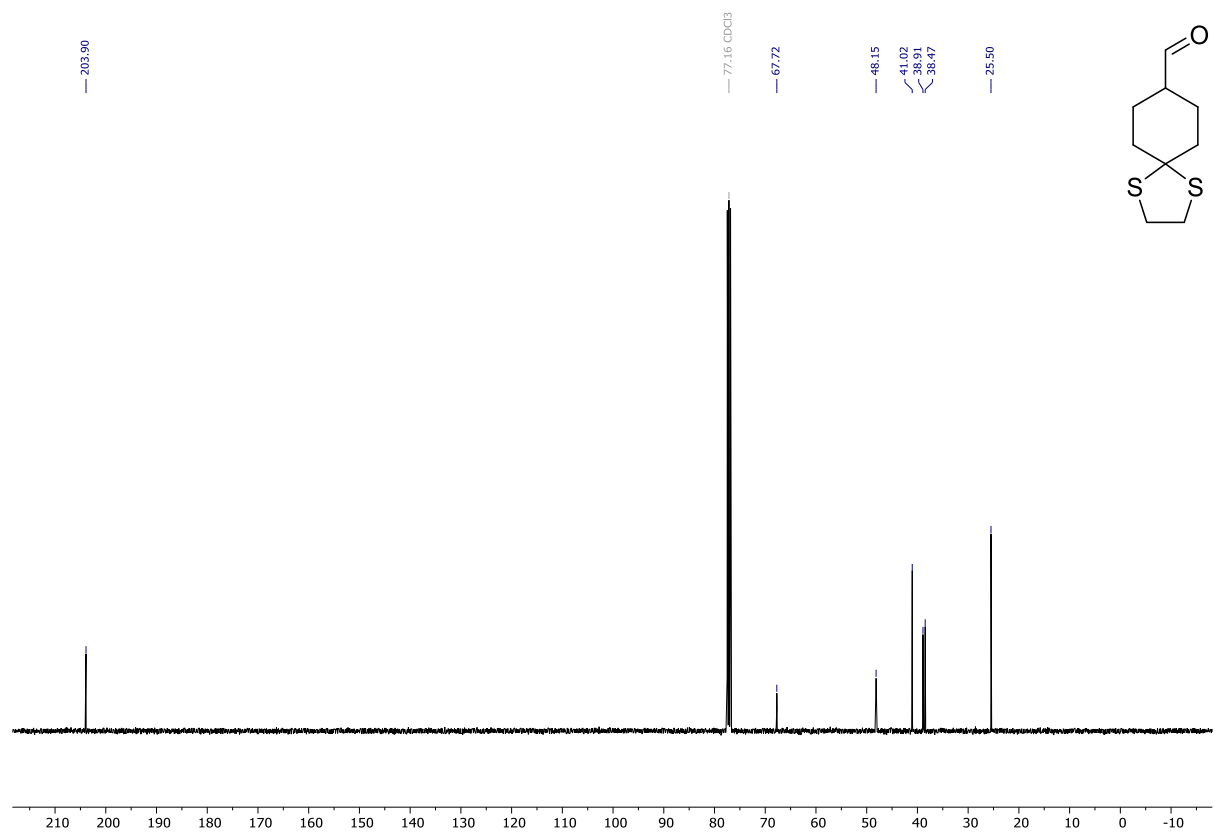

**<sup>1</sup>H NMR (400 MHz, CDCl<sub>3</sub>): S14**

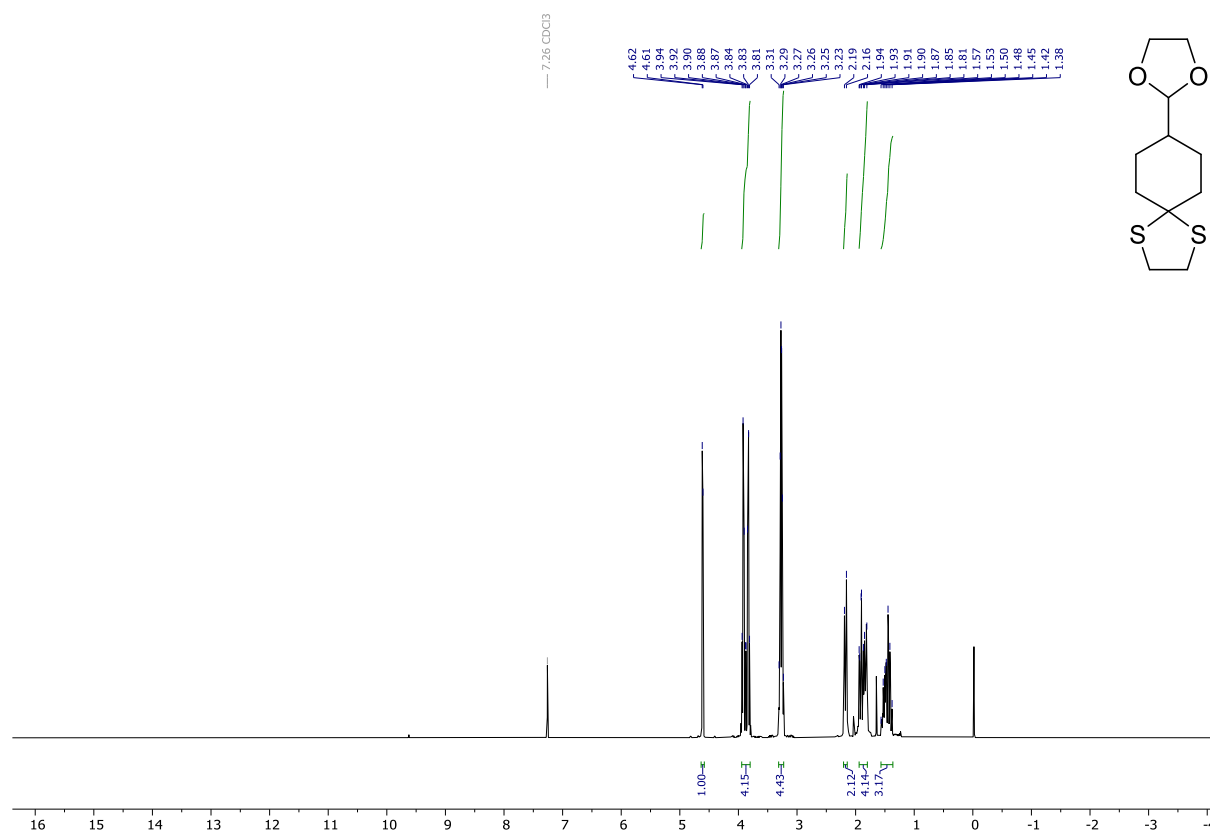

**<sup>13</sup>C NMR (101 MHz, CDCl<sub>3</sub>): S14**

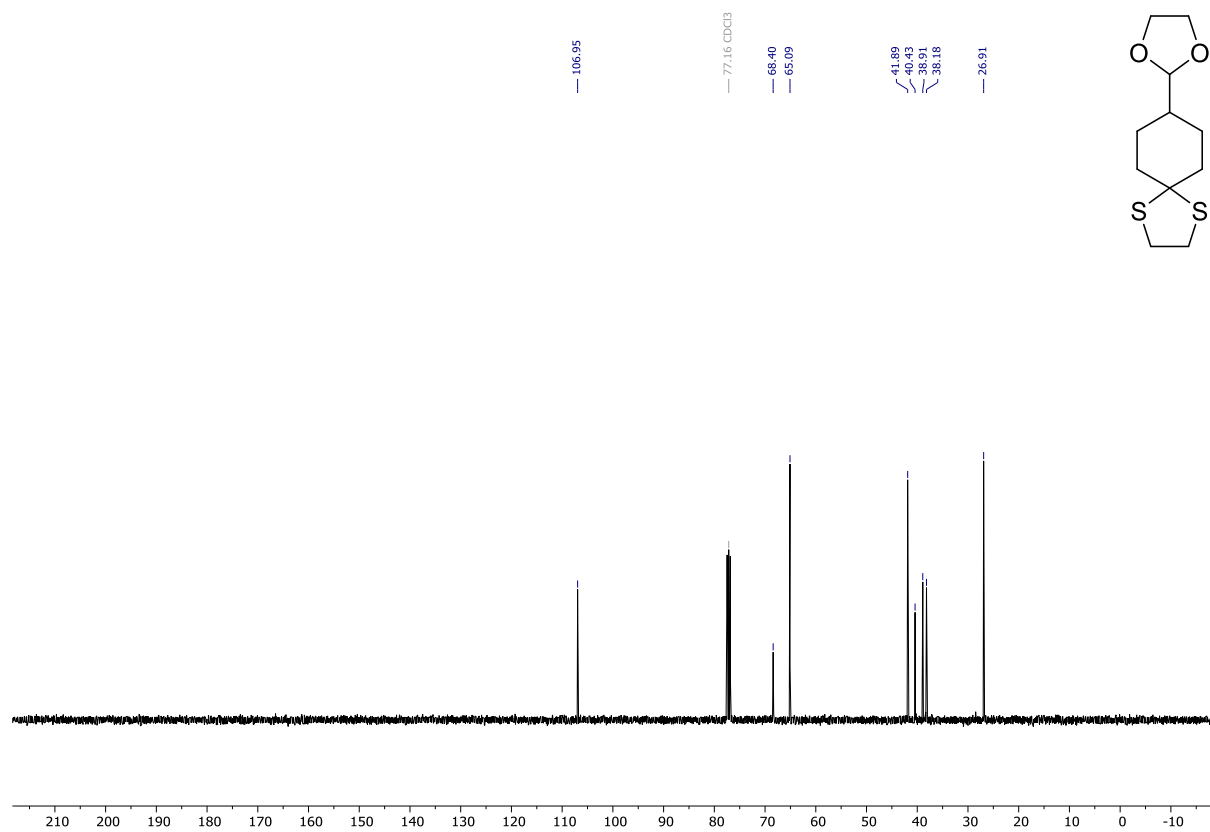

**<sup>1</sup>H NMR (400 MHz, CDCl<sub>3</sub>): SI5**

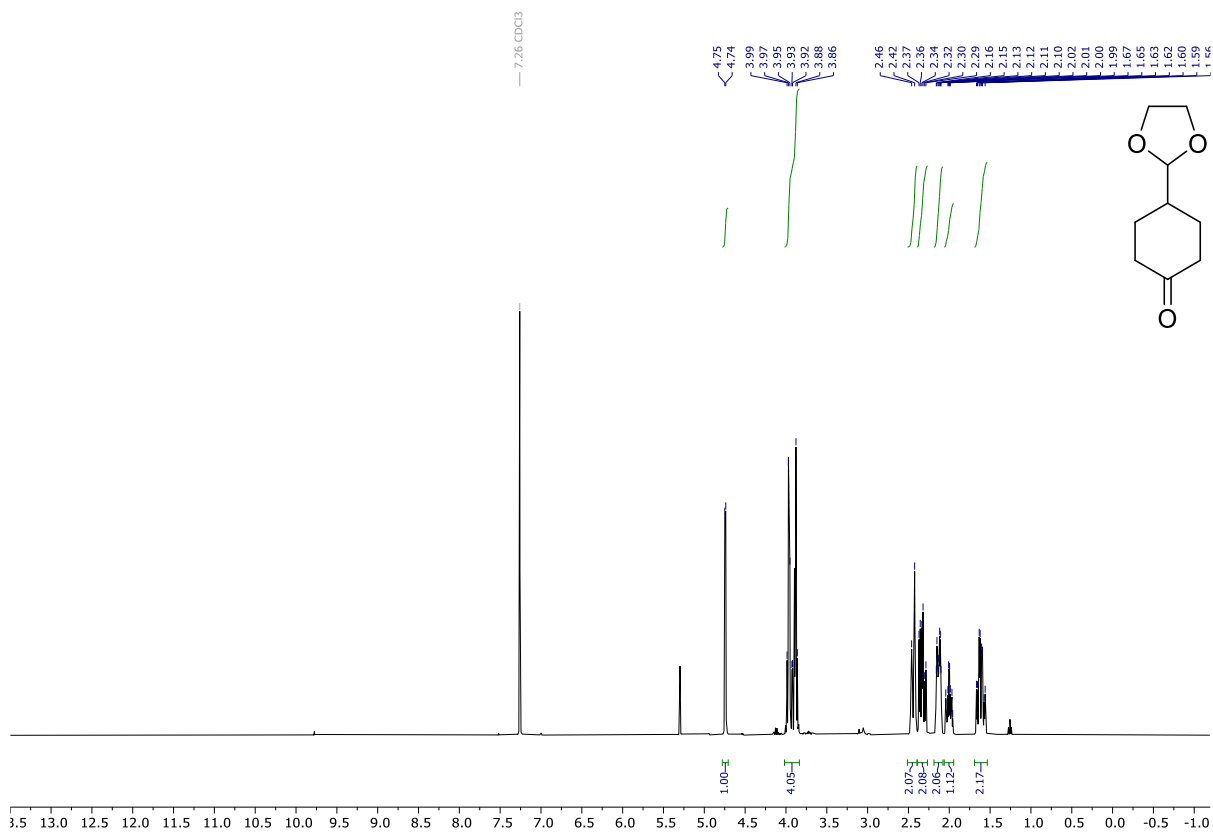

**<sup>13</sup>C NMR (101 MHz, CDCl<sub>3</sub>): SI5**

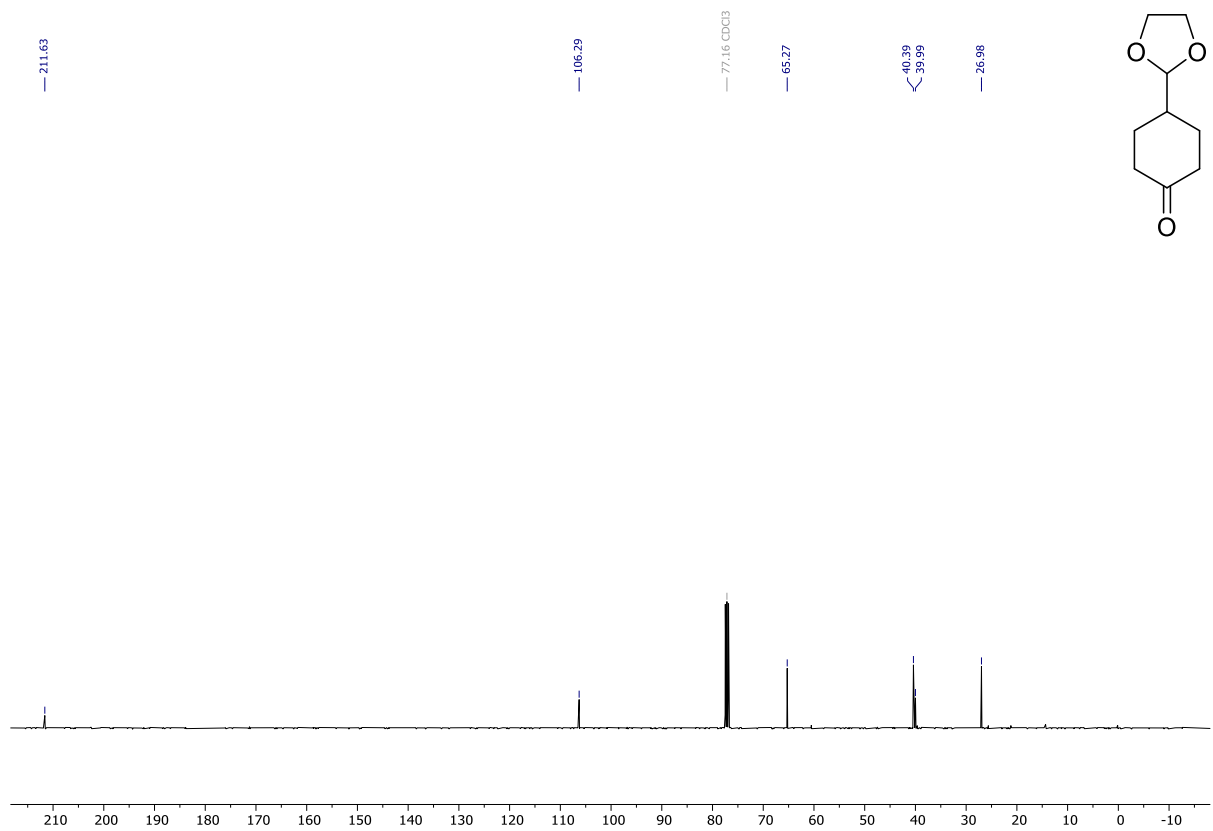

**<sup>1</sup>H NMR (400 MHz, CDCl<sub>3</sub>): S16**

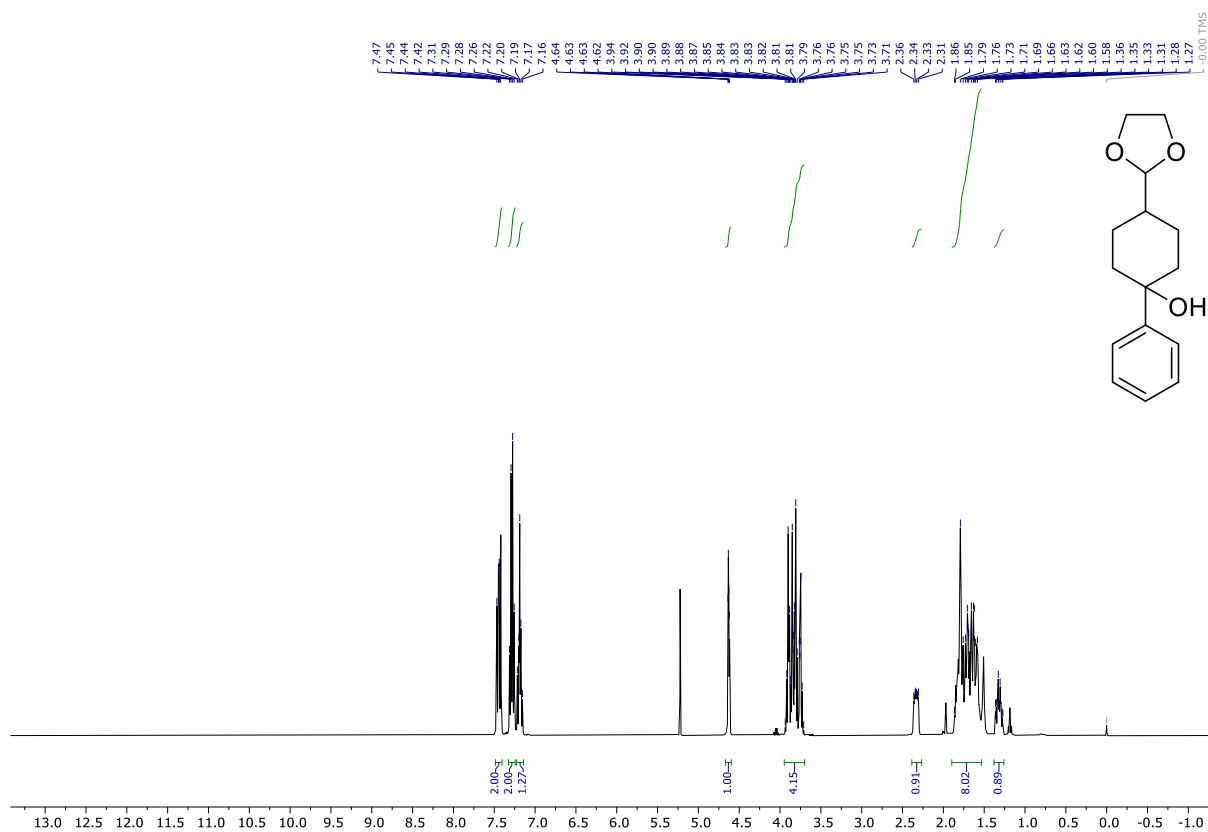

**<sup>13</sup>C NMR (101 MHz, CDCl<sub>3</sub>): S16**

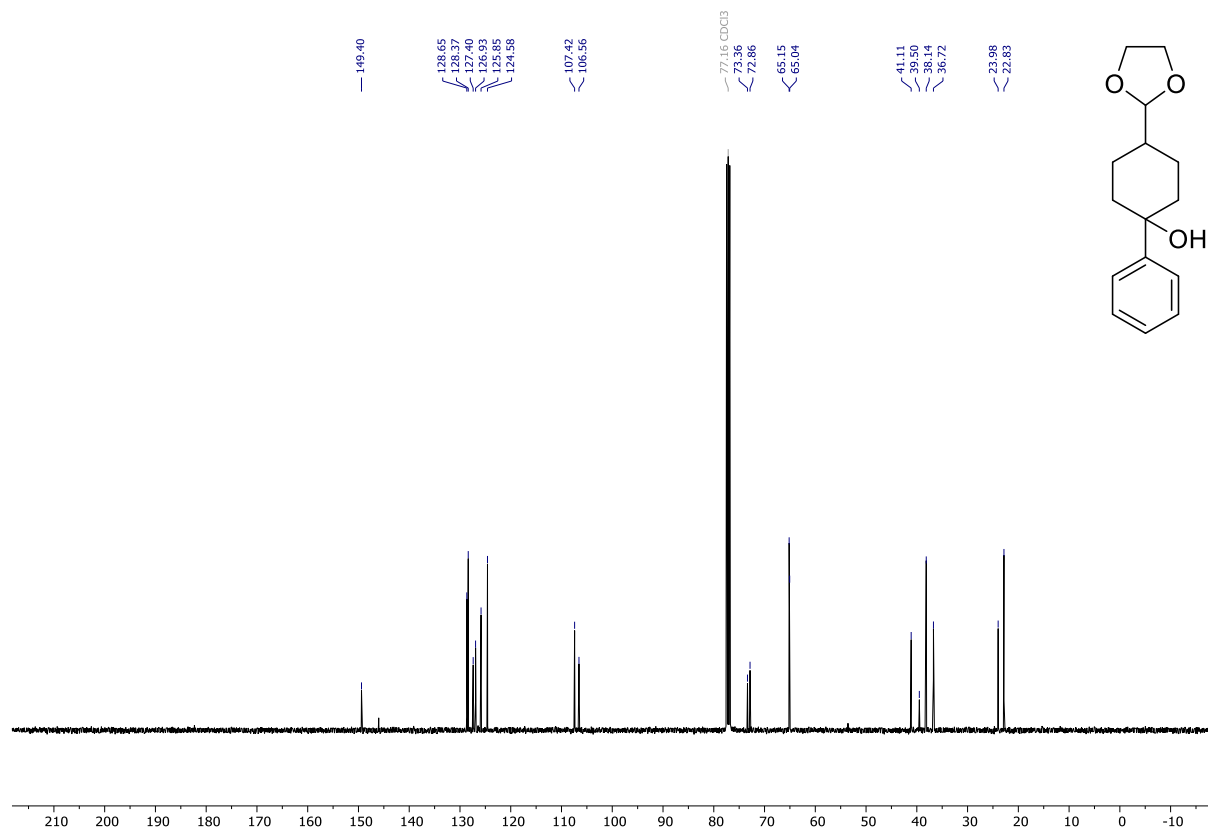

**<sup>1</sup>H NMR (400 MHz, CDCl<sub>3</sub>): S17**

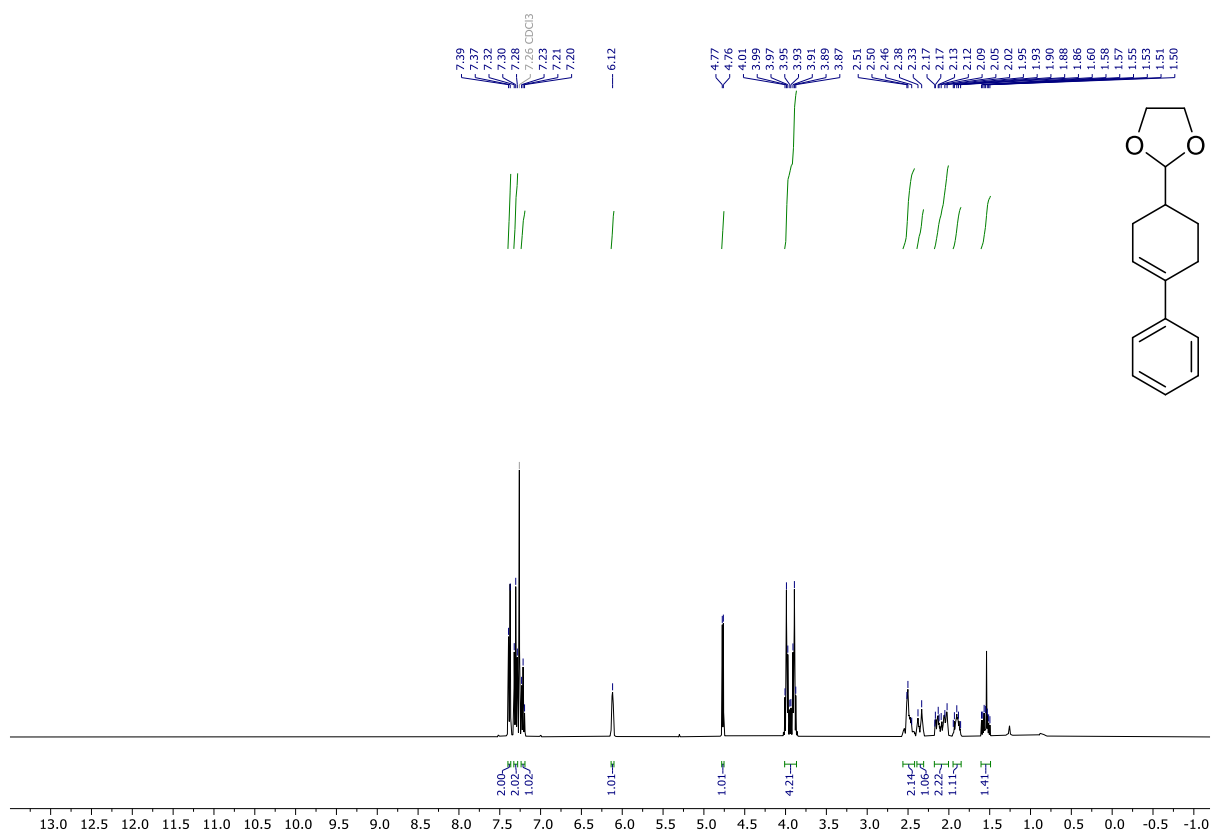

**<sup>13</sup>C NMR (101 MHz, CDCl<sub>3</sub>): S17**

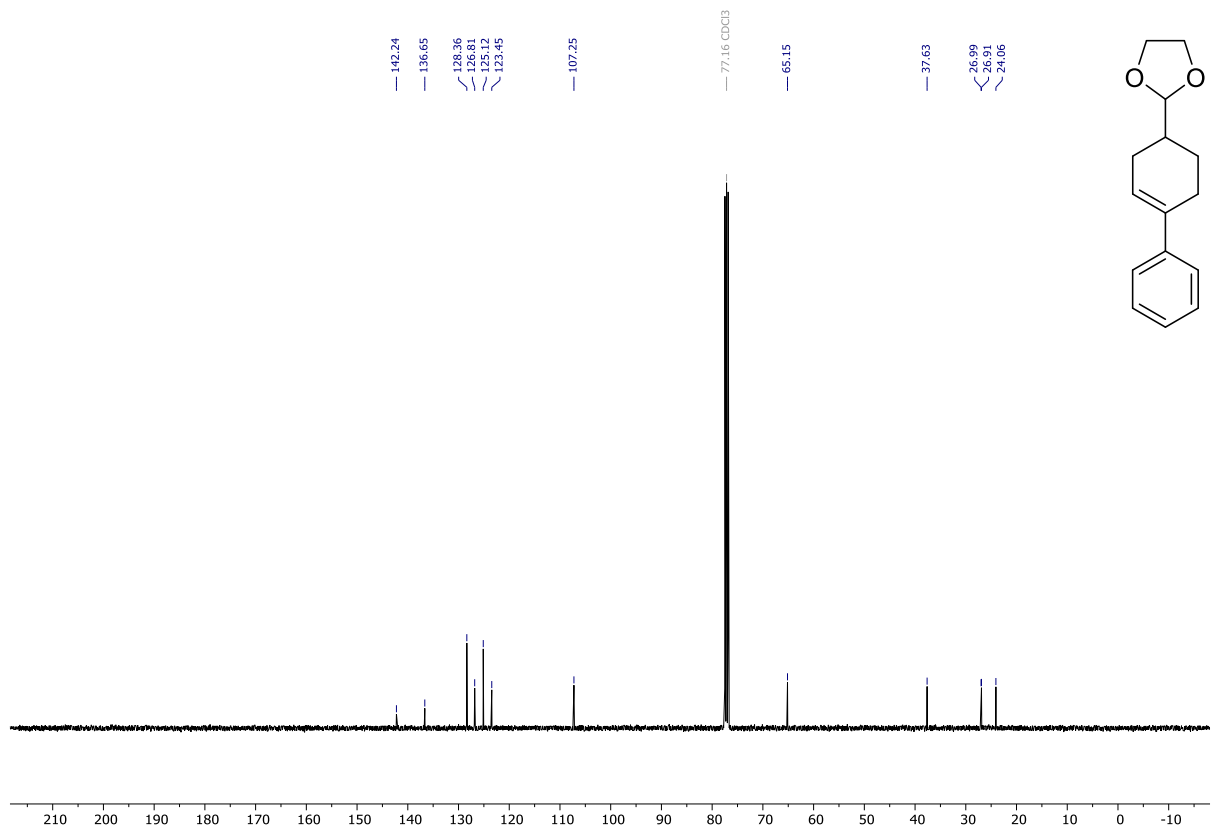

**<sup>1</sup>H NMR (500 MHz, CDCl<sub>3</sub>): 1c**

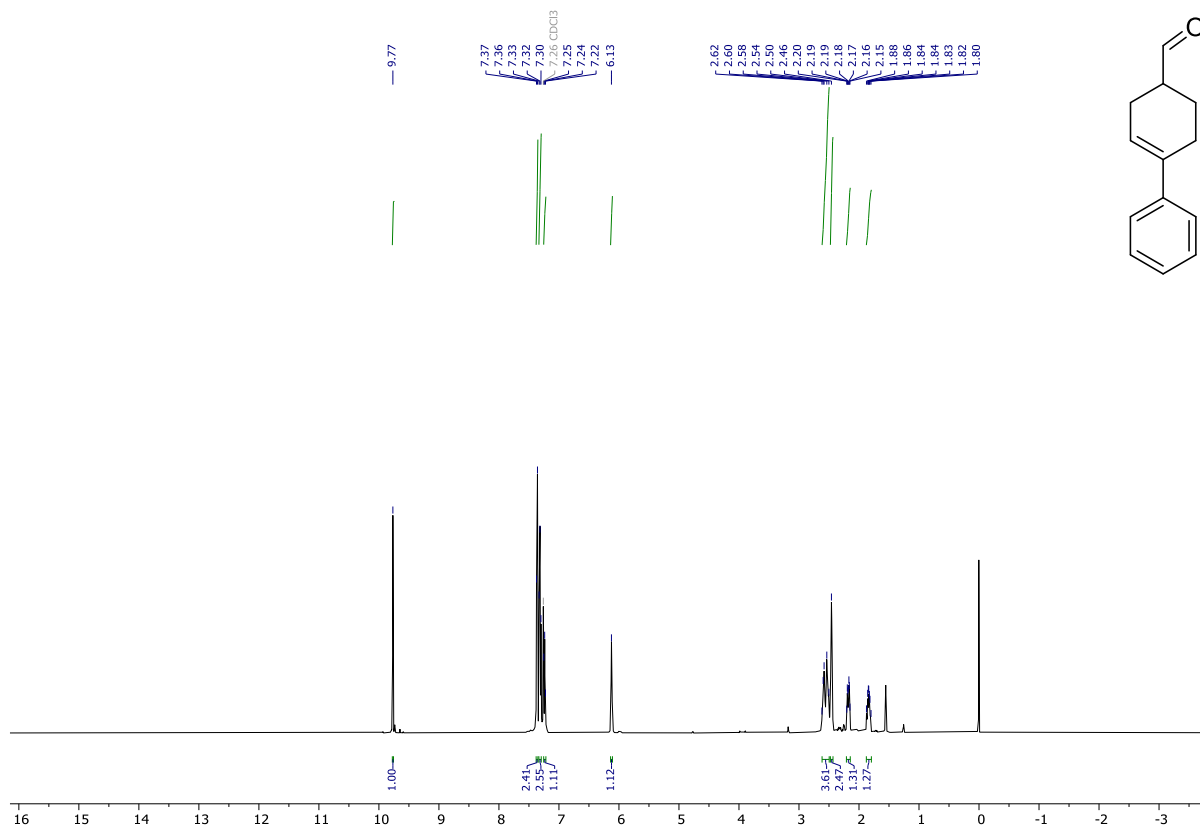

**<sup>13</sup>C NMR (126 MHz, CDCl<sub>3</sub>): 1c**

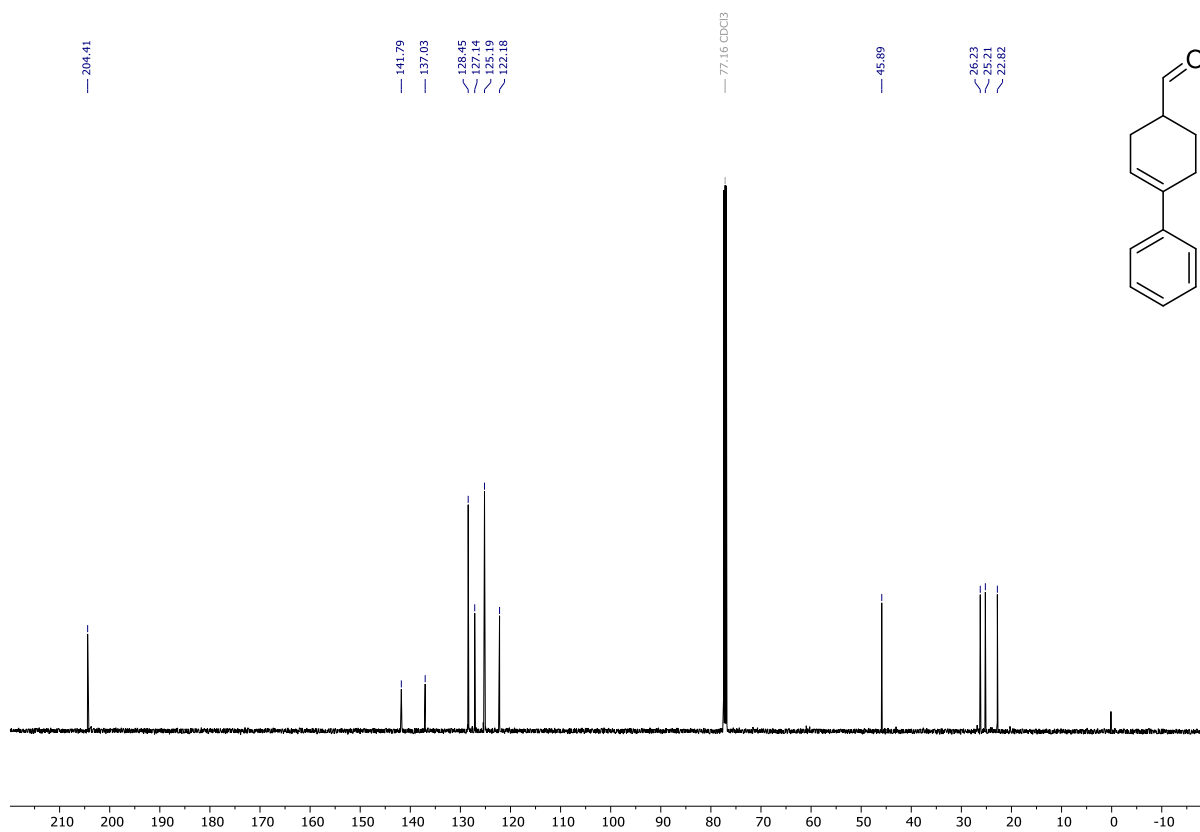

**<sup>1</sup>H NMR (500 MHz, CDCl<sub>3</sub>): 1d**

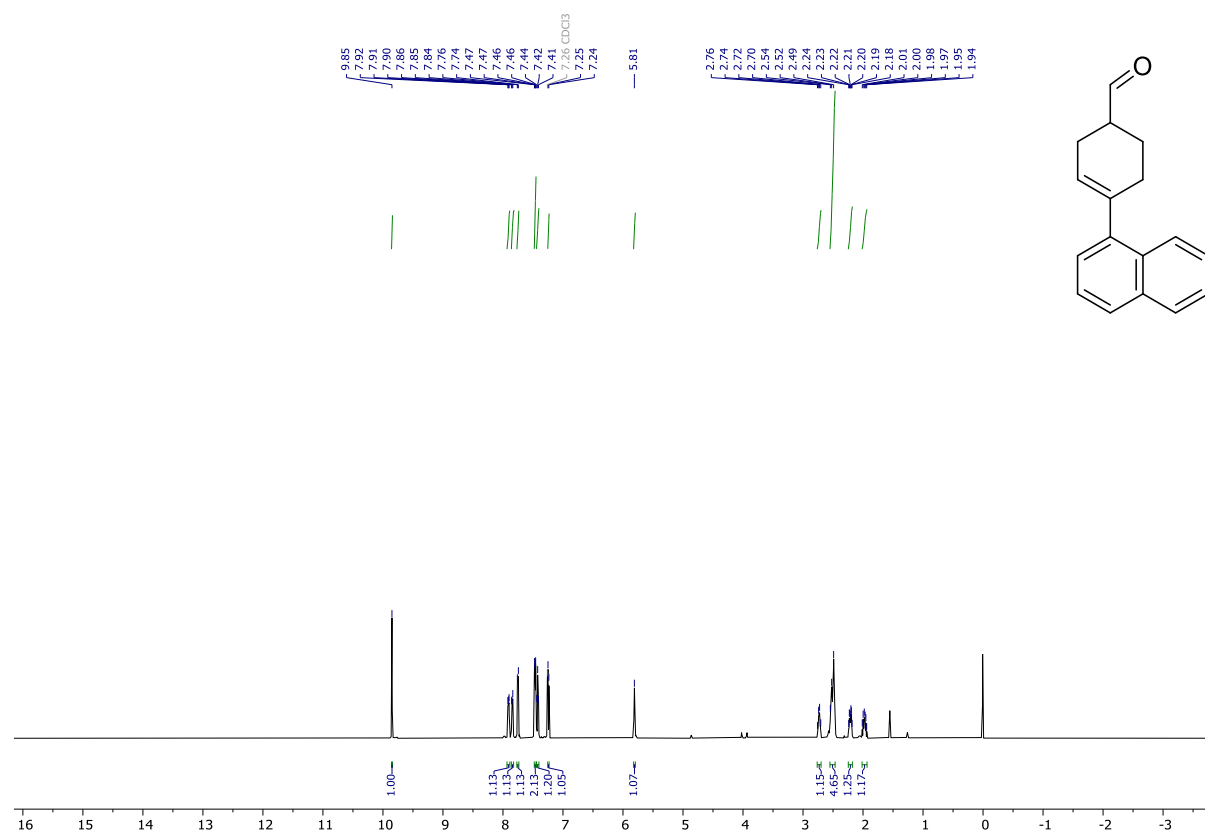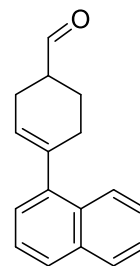

**<sup>13</sup>C NMR (126 MHz, CDCl<sub>3</sub>): 1d**

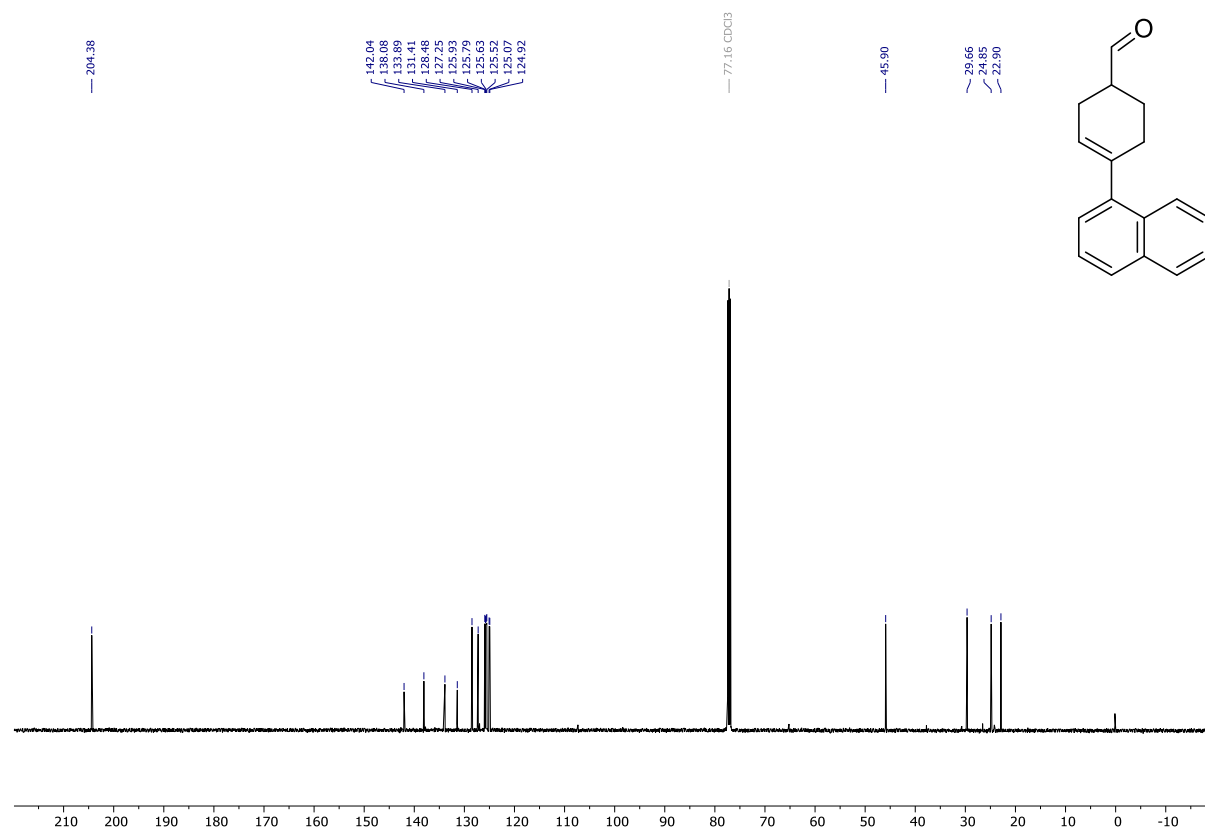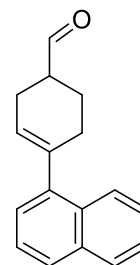

**<sup>1</sup>H NMR (500 MHz, CDCl<sub>3</sub>): 1e**

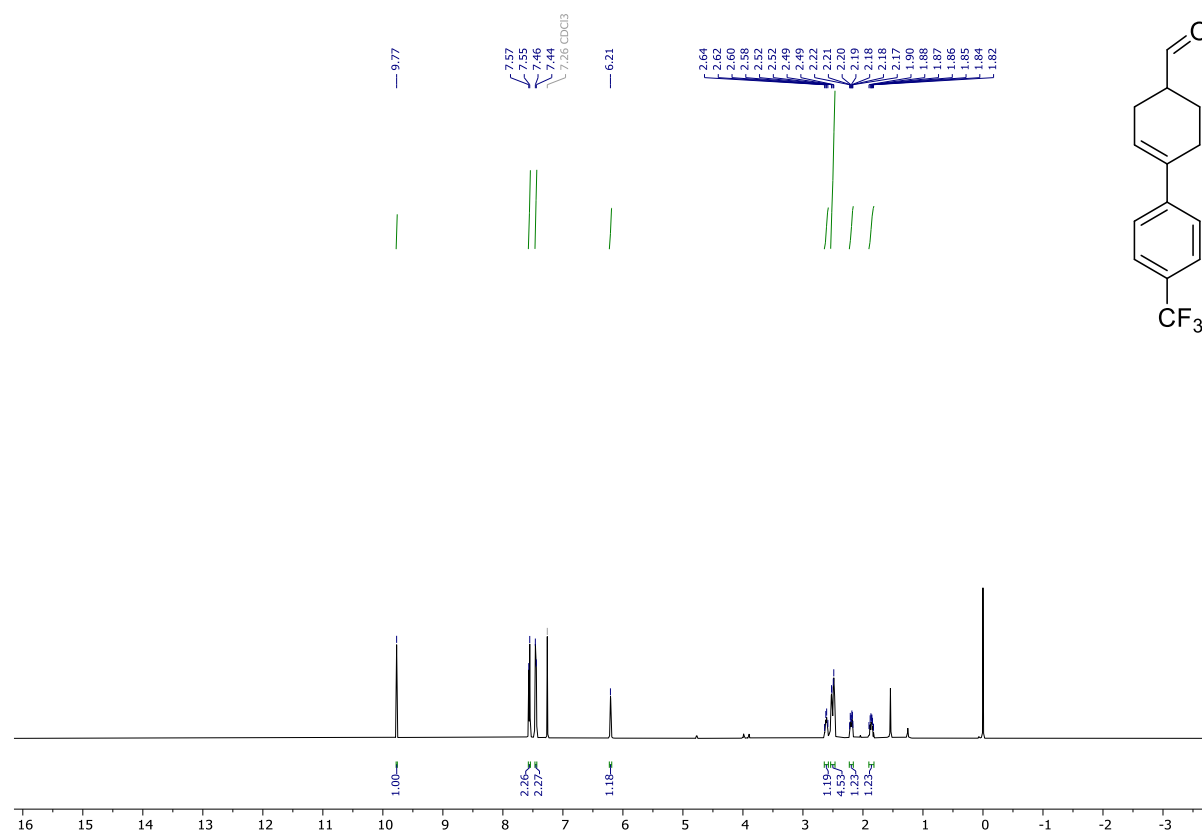

**<sup>13</sup>C NMR (126 MHz, CDCl<sub>3</sub>): 1e**

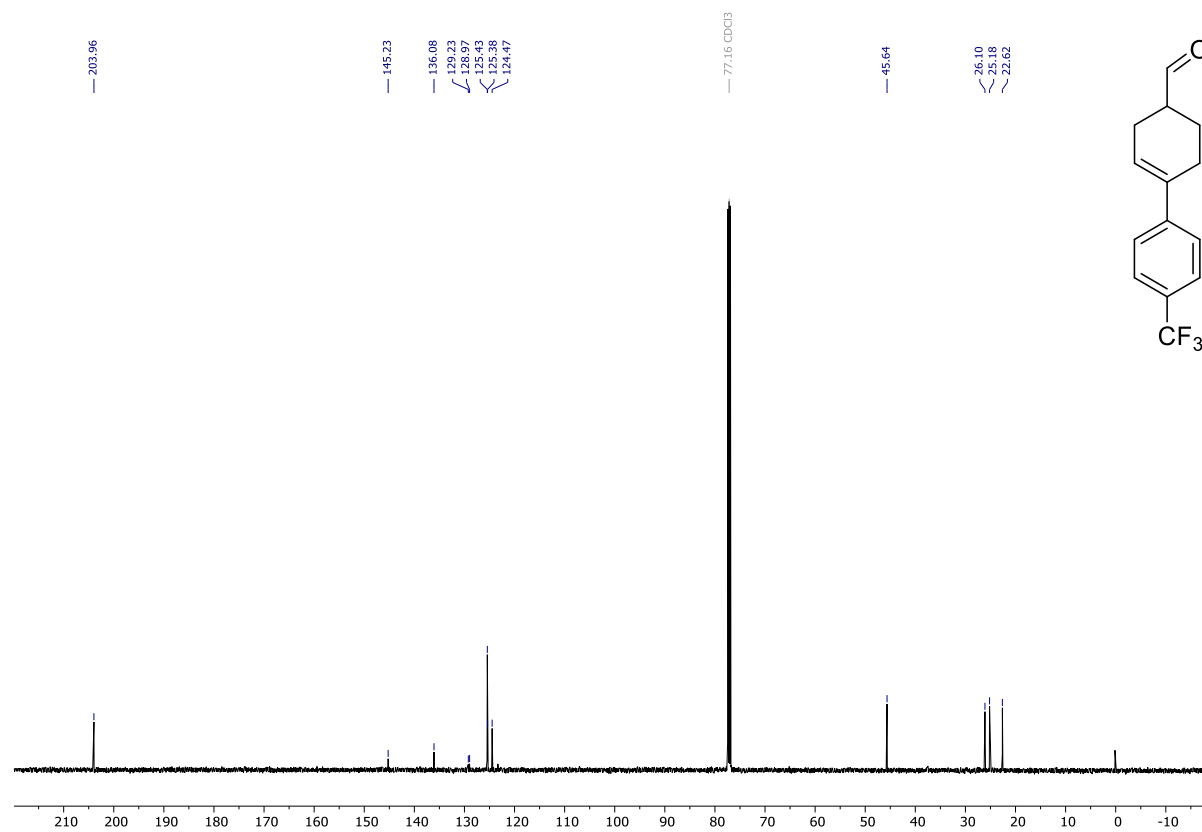

**<sup>19</sup>F NMR (377 MHz, CDCl<sub>3</sub>): 1e**

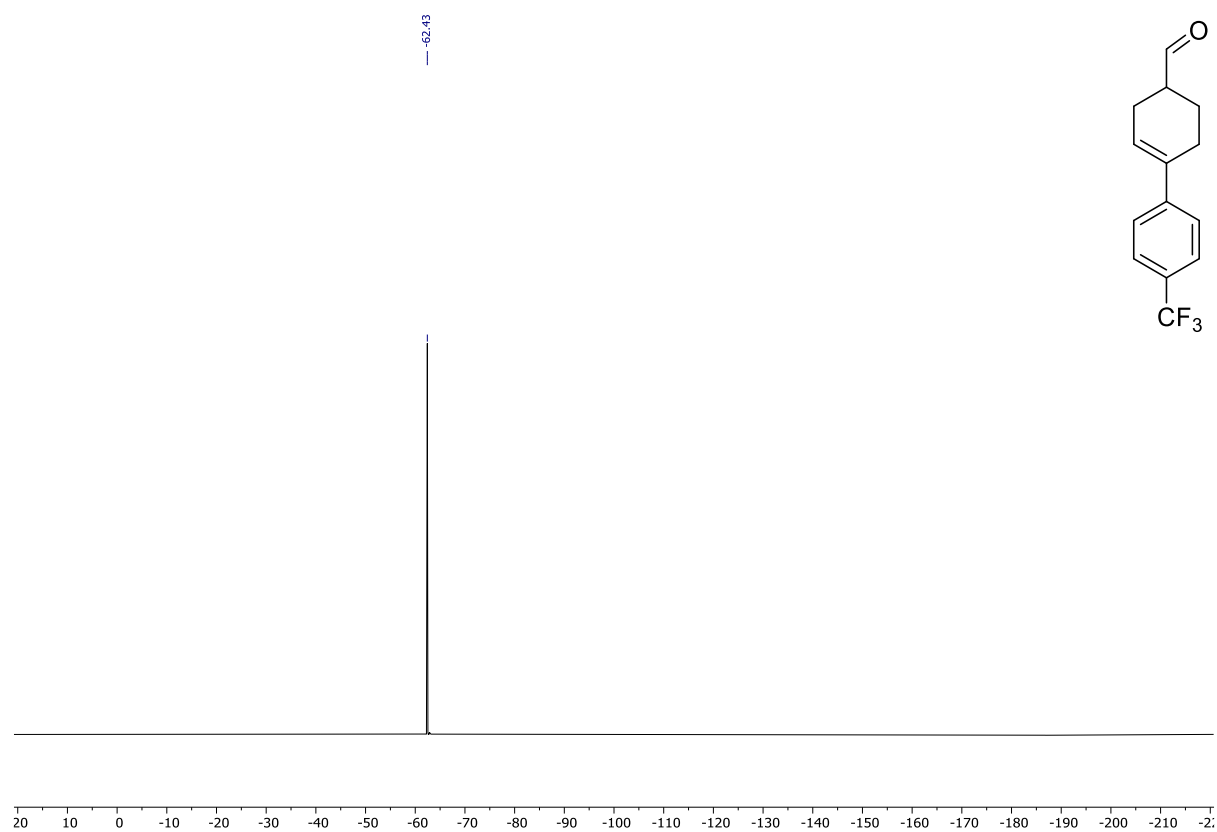

**<sup>1</sup>H NMR (400 MHz, CDCl<sub>3</sub>): 1f**

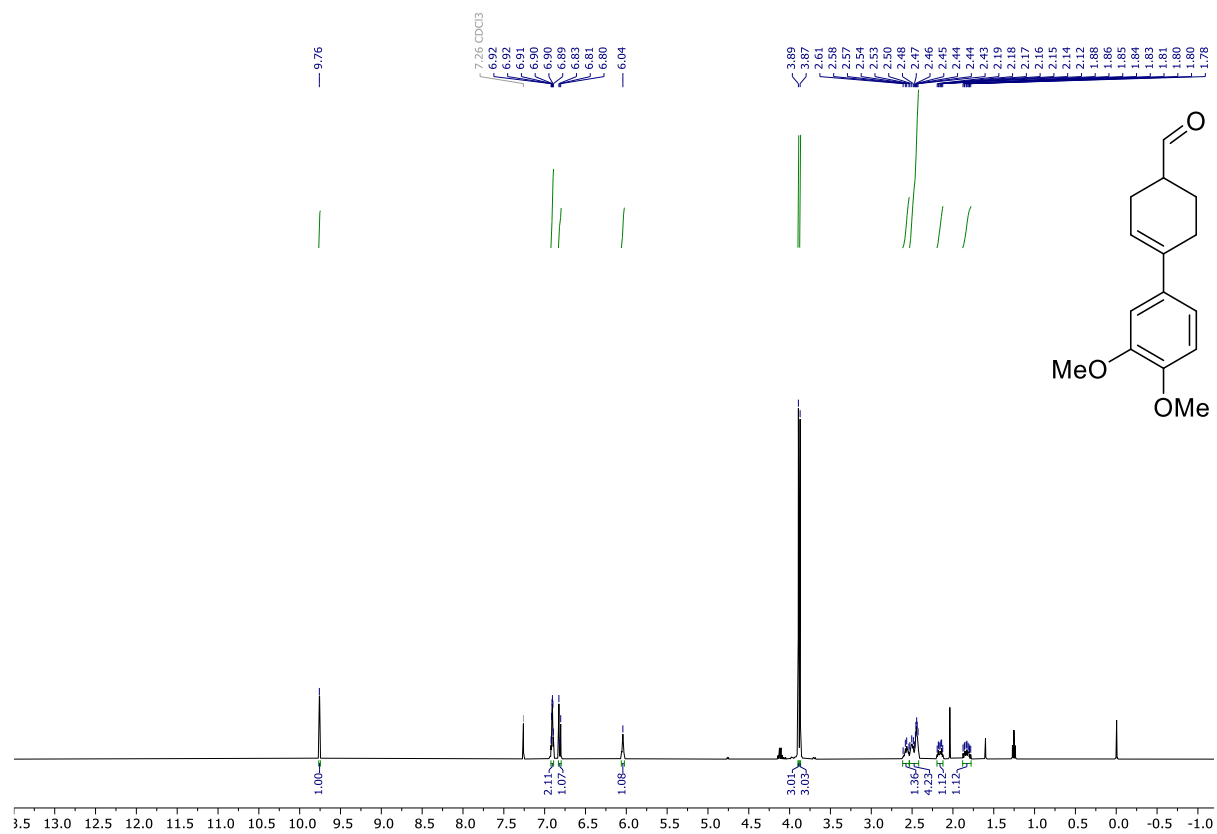

**<sup>13</sup>C NMR (101 MHz, CDCl<sub>3</sub>): 1f**

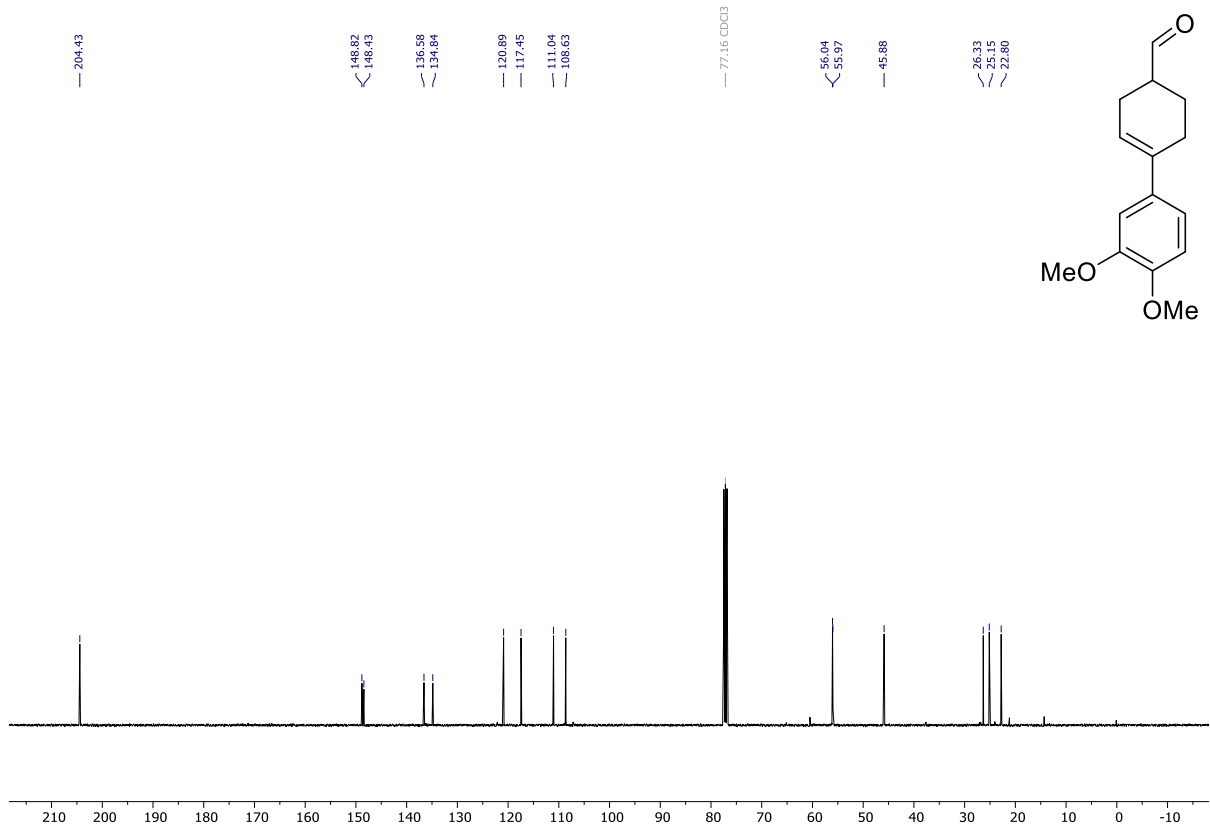

**<sup>1</sup>H NMR (500 MHz, CDCl<sub>3</sub>): 1g**

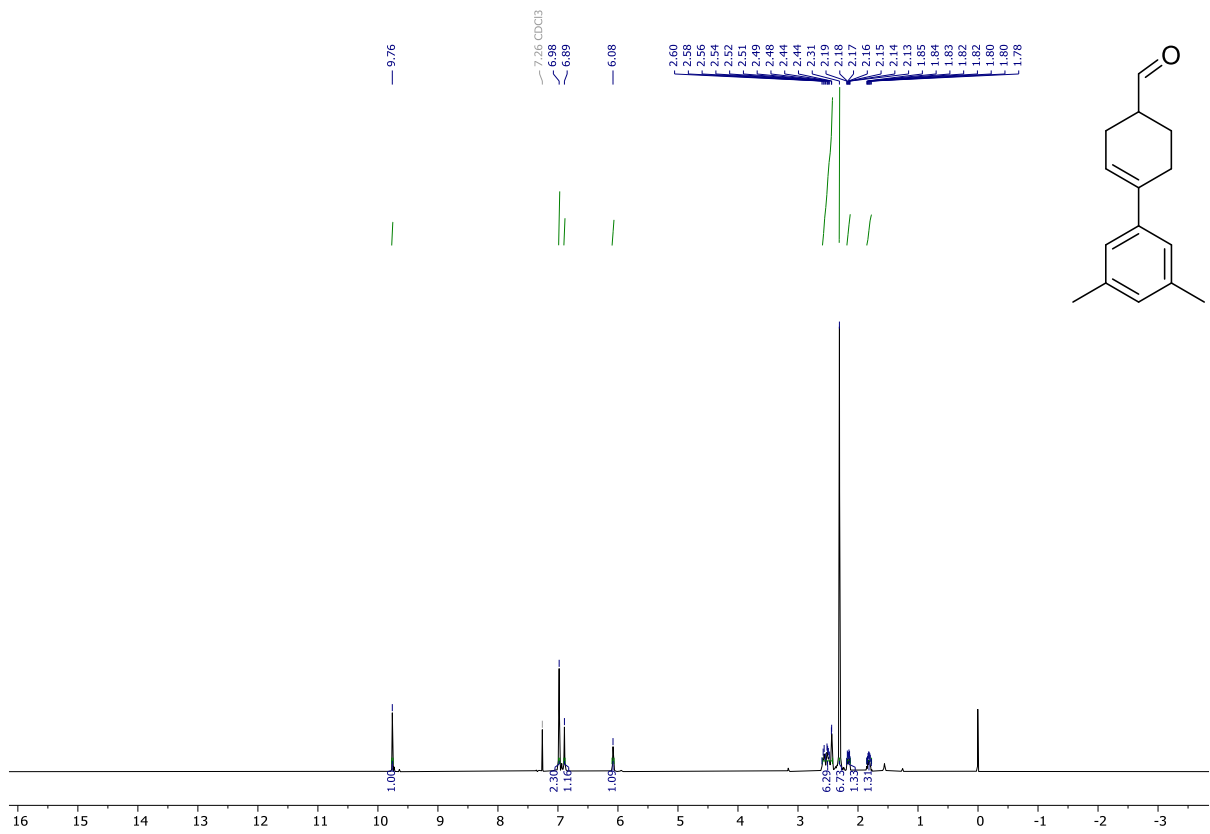



**<sup>13</sup>C NMR (101 MHz, CDCl<sub>3</sub>): 1h**

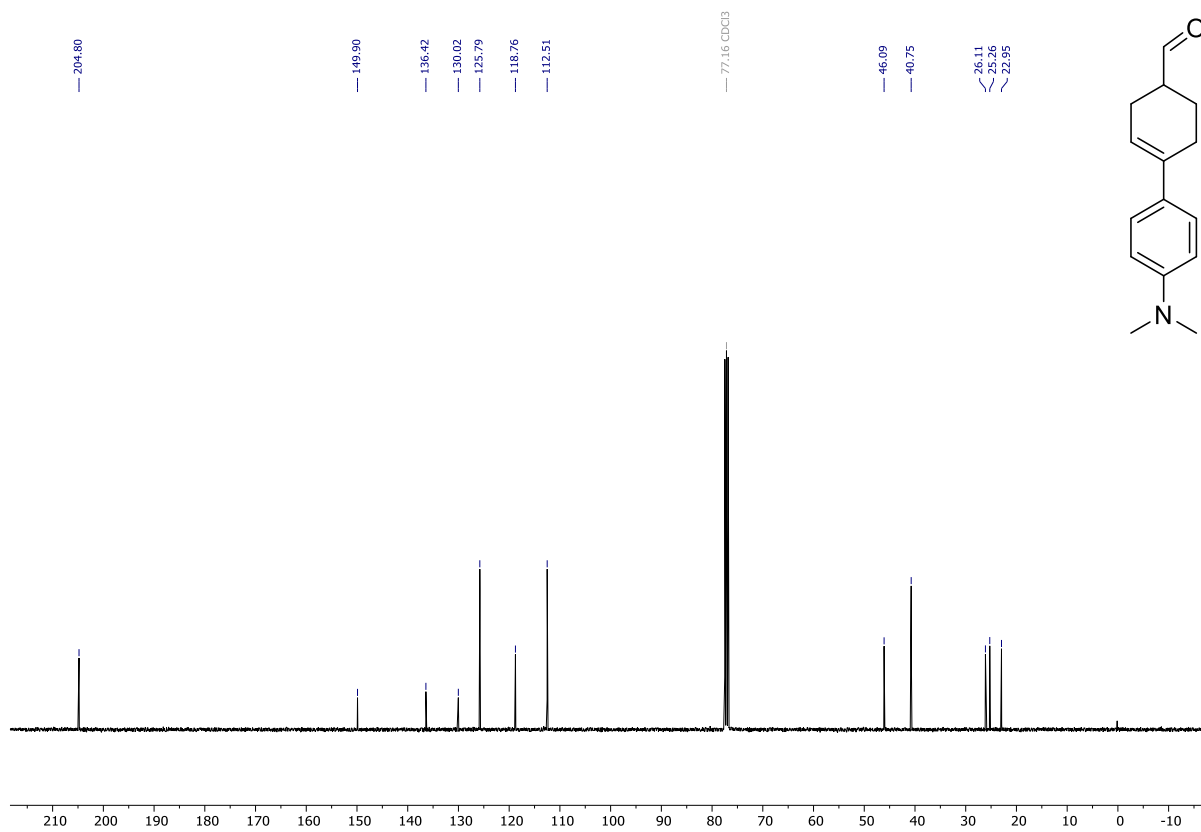

**<sup>1</sup>H NMR (500 MHz, CDCl<sub>3</sub>): 1i**

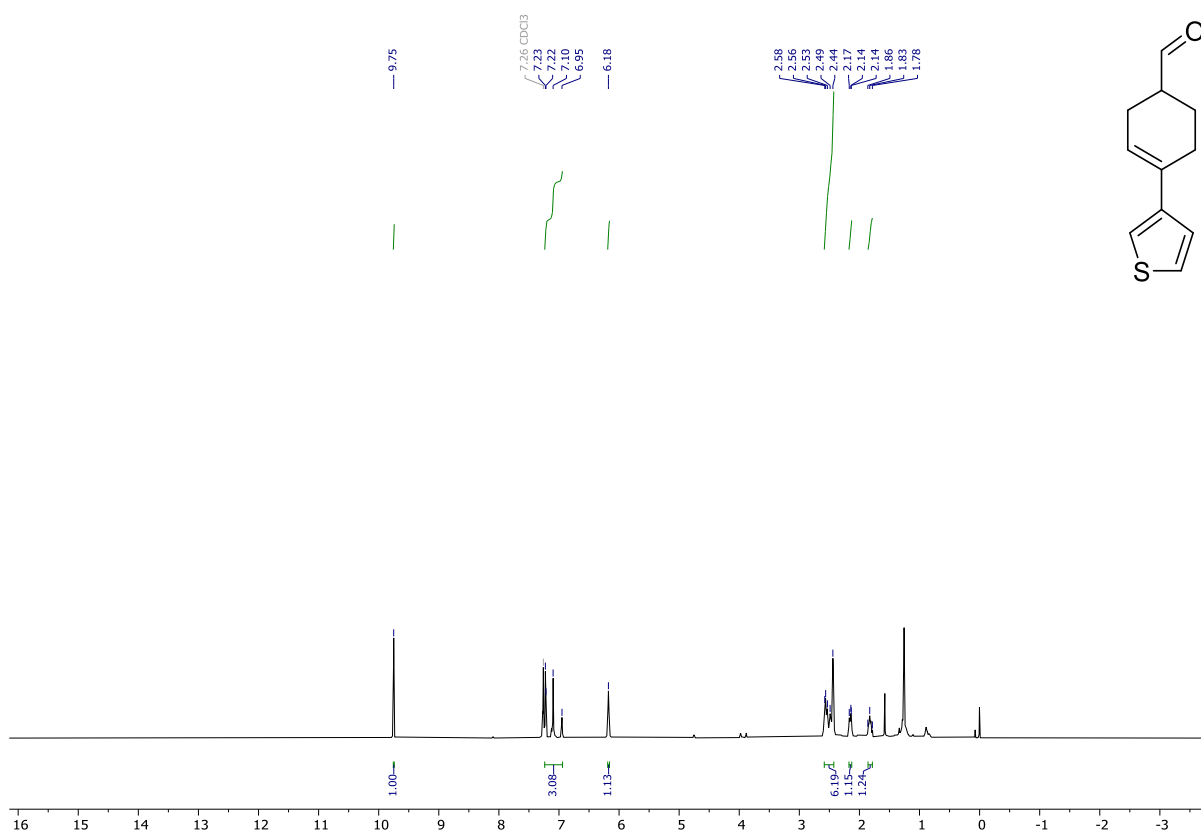

**<sup>13</sup>C NMR (126 MHz, CDCl<sub>3</sub>): 1i**

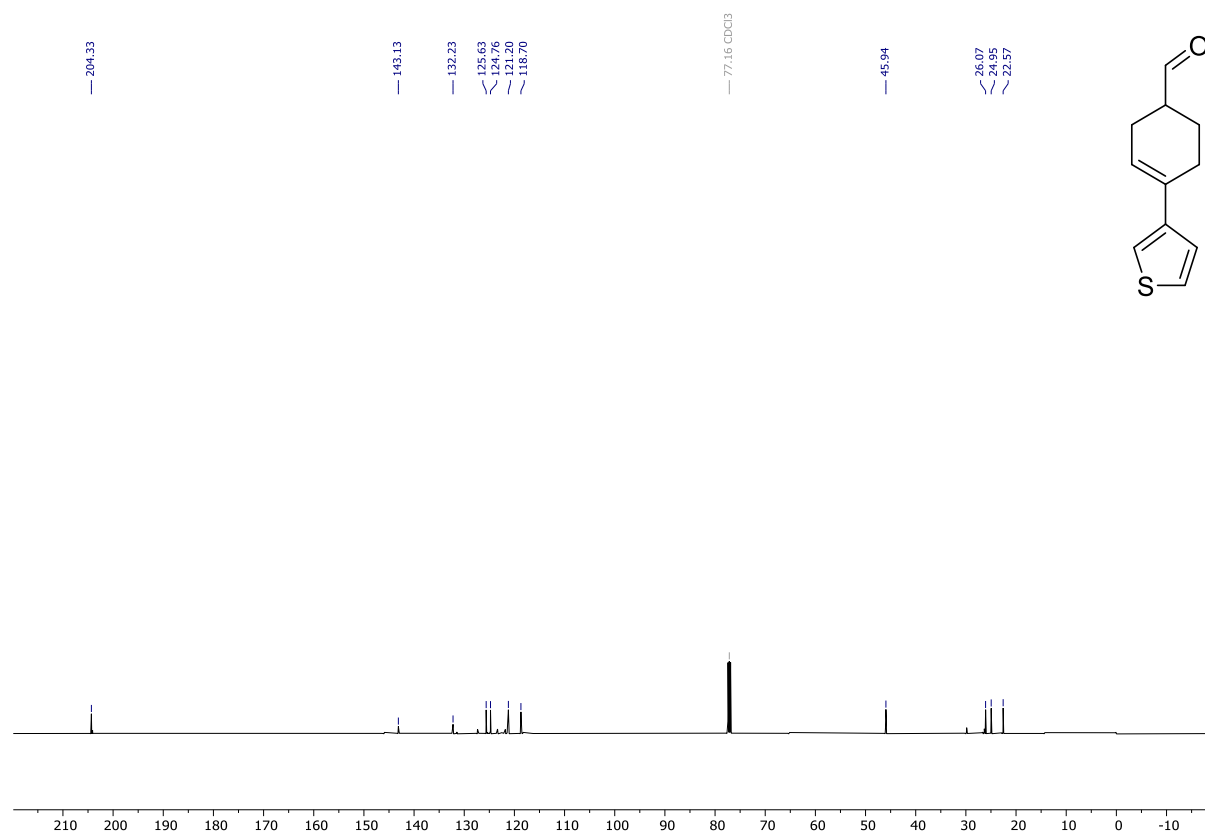

**<sup>1</sup>H NMR (400 MHz, CDCl<sub>3</sub>): 2c**

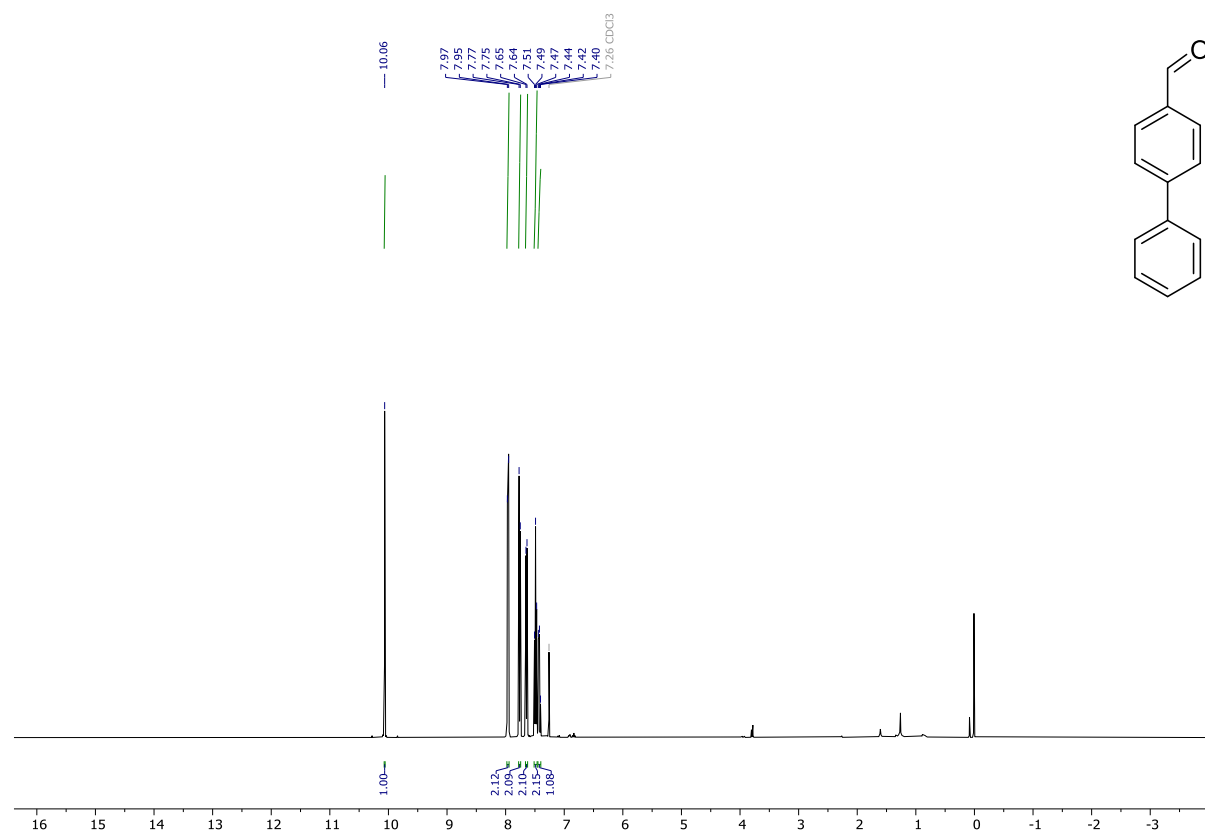

<sup>13</sup>C NMR (101 MHz, CDCl<sub>3</sub>): 2c

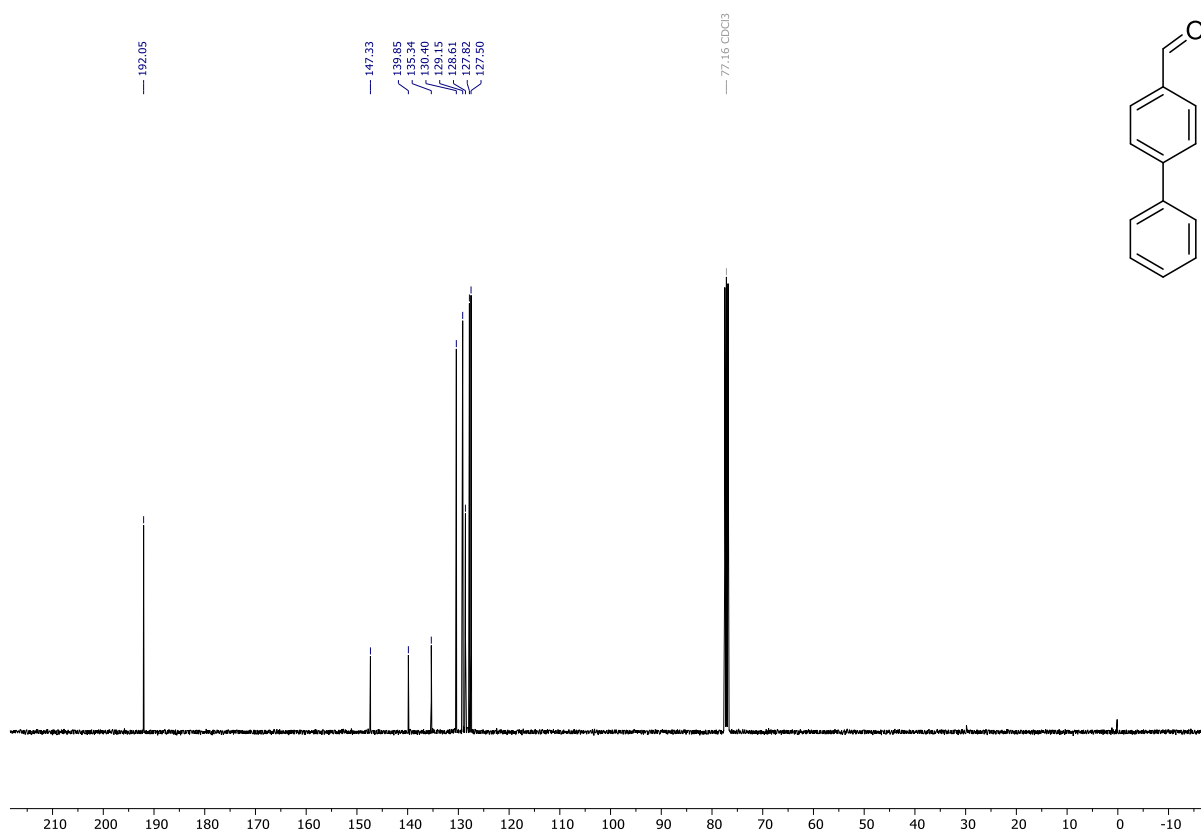

<sup>1</sup>H NMR (400 MHz, CDCl<sub>3</sub>): 2d

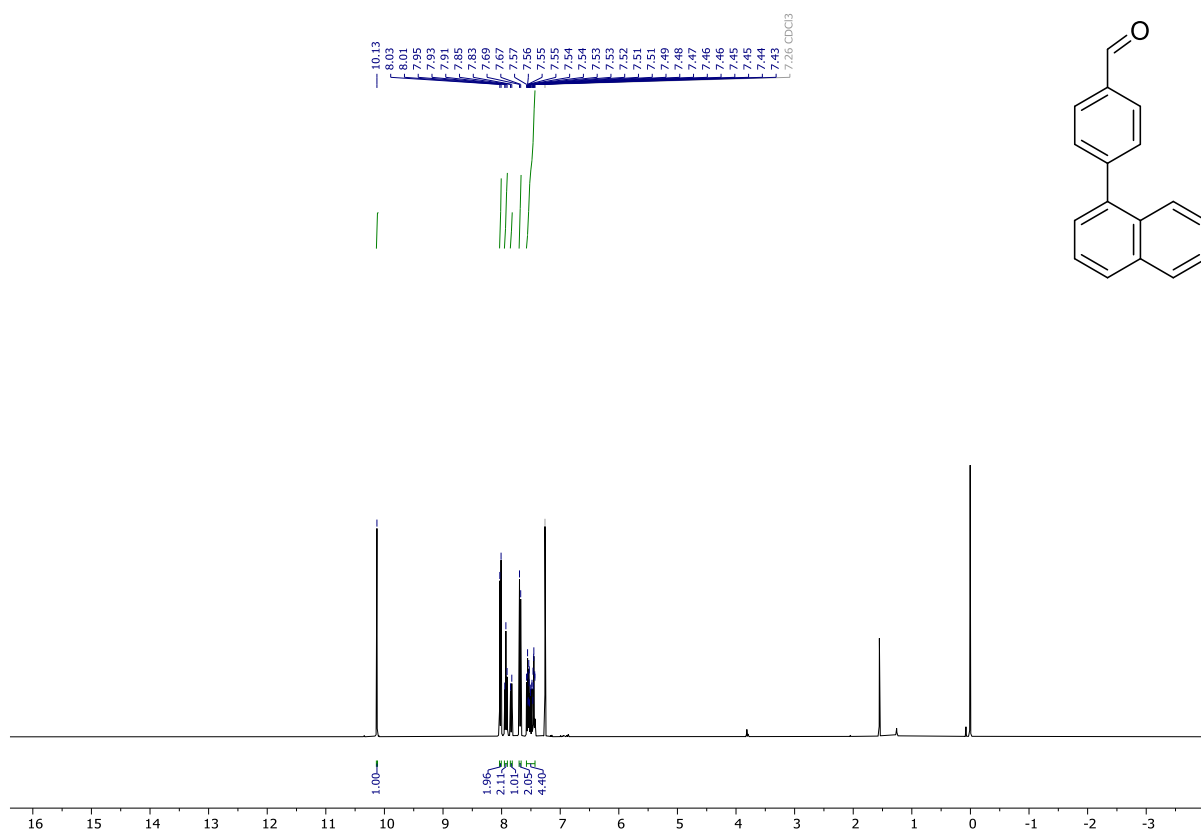

**<sup>13</sup>C NMR (101 MHz, CDCl<sub>3</sub>): 2d**

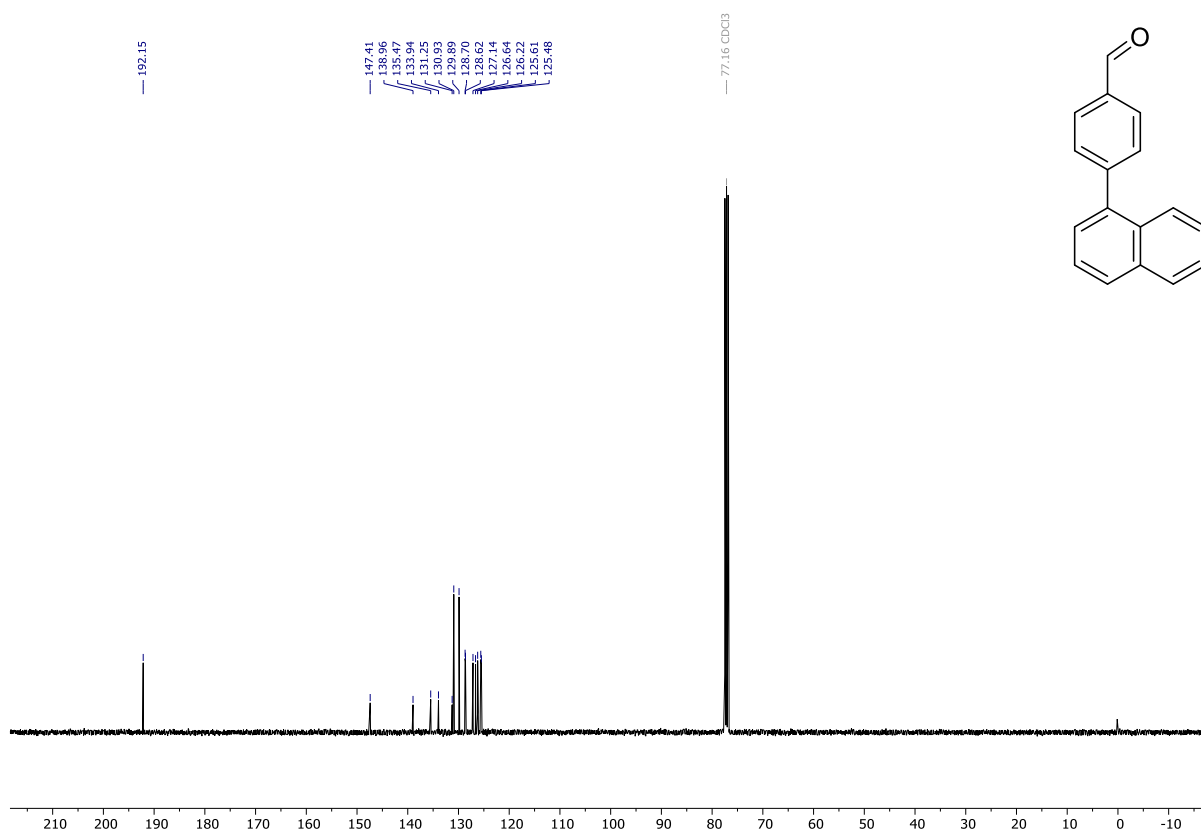

**<sup>1</sup>H NMR (400 MHz, CDCl<sub>3</sub>): 2e**

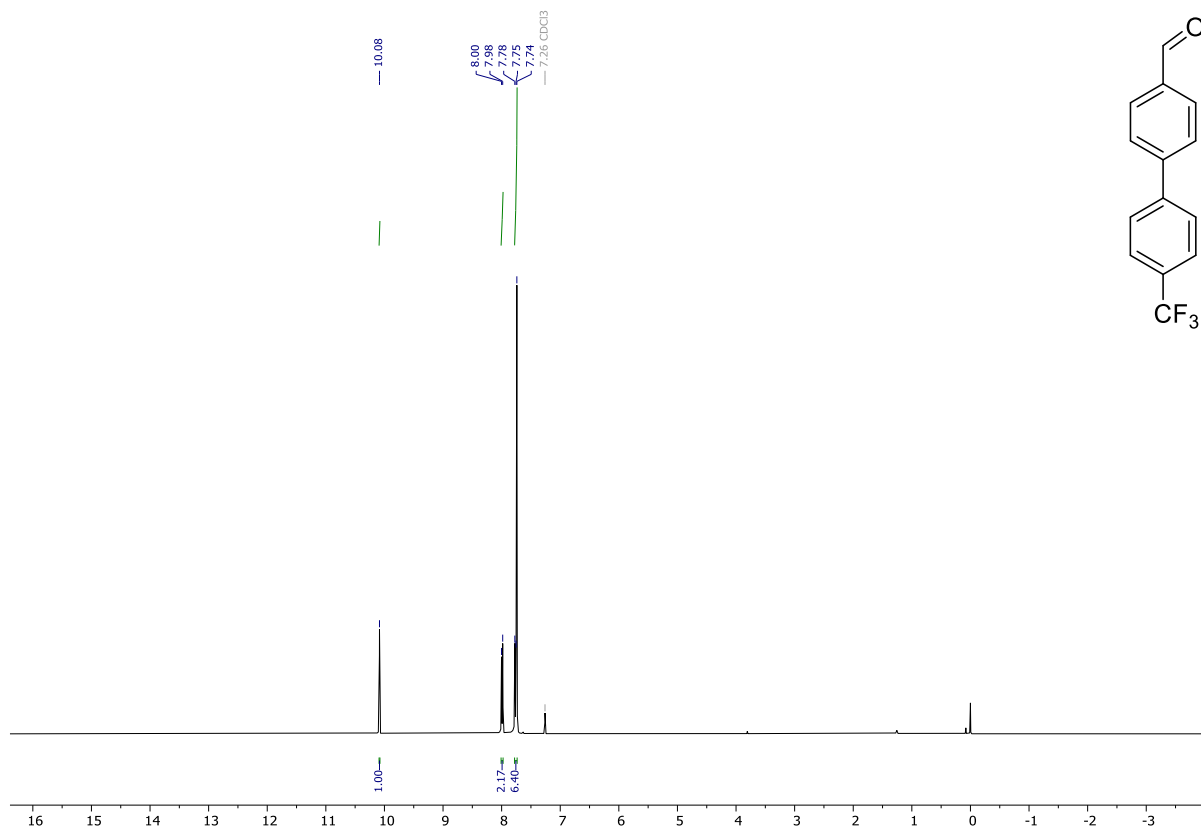

**<sup>13</sup>C NMR (101 MHz, CDCl<sub>3</sub>): 2e**

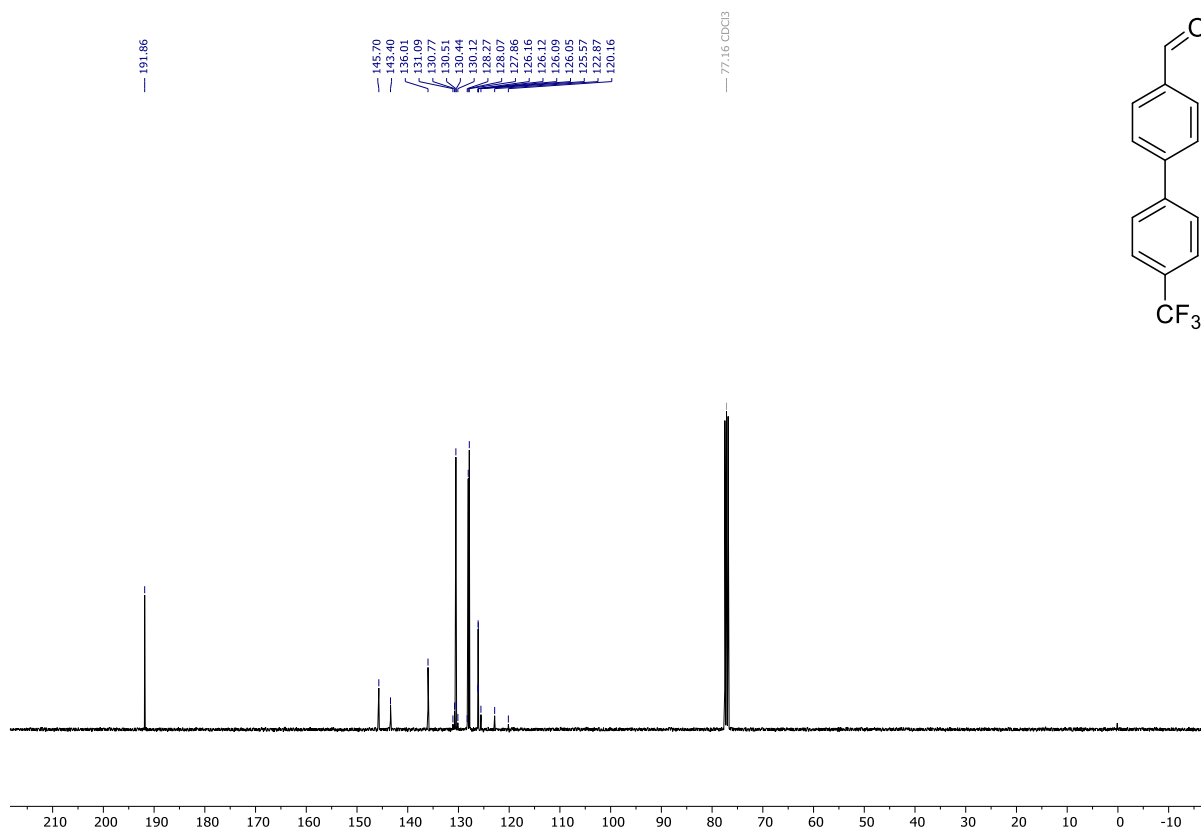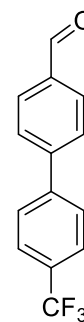

**<sup>19</sup>F NMR (470 MHz, CDCl<sub>3</sub>): 2e**

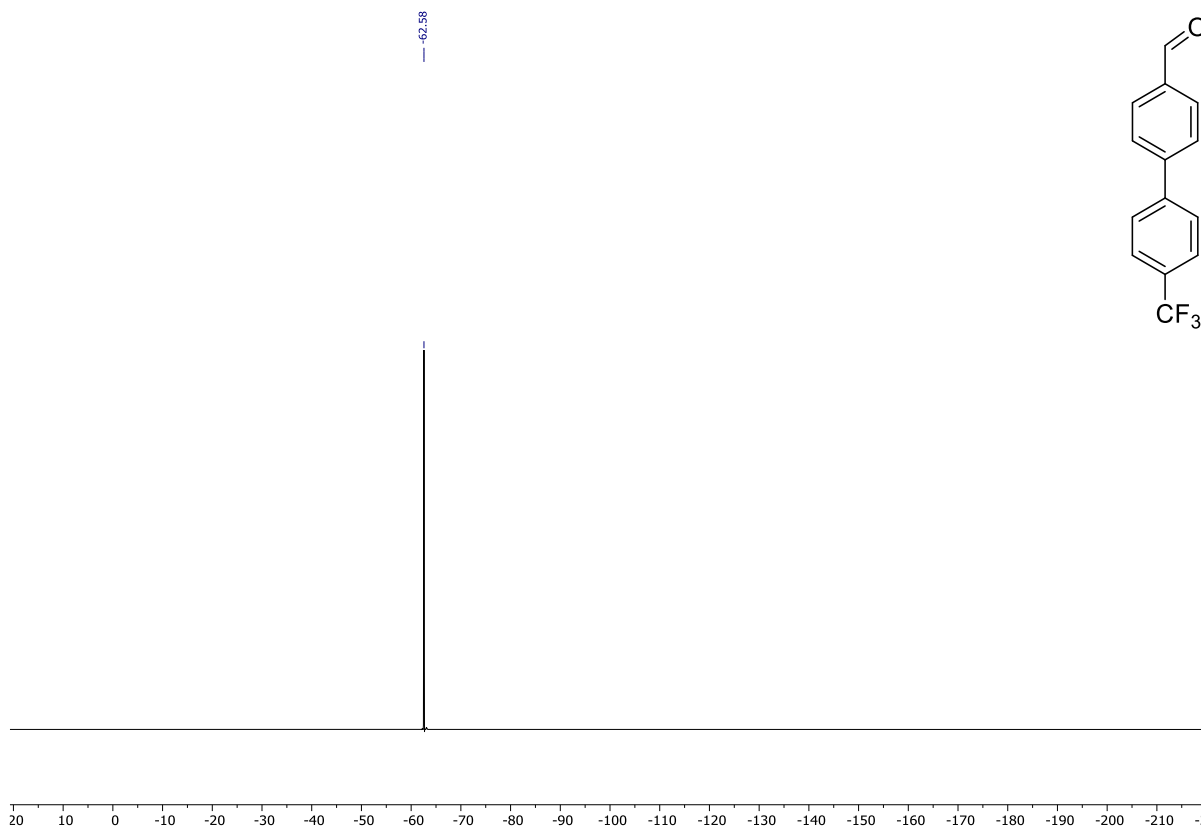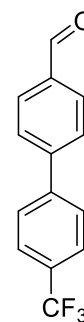

<sup>1</sup>H NMR (400 MHz, CDCl<sub>3</sub>): 2f

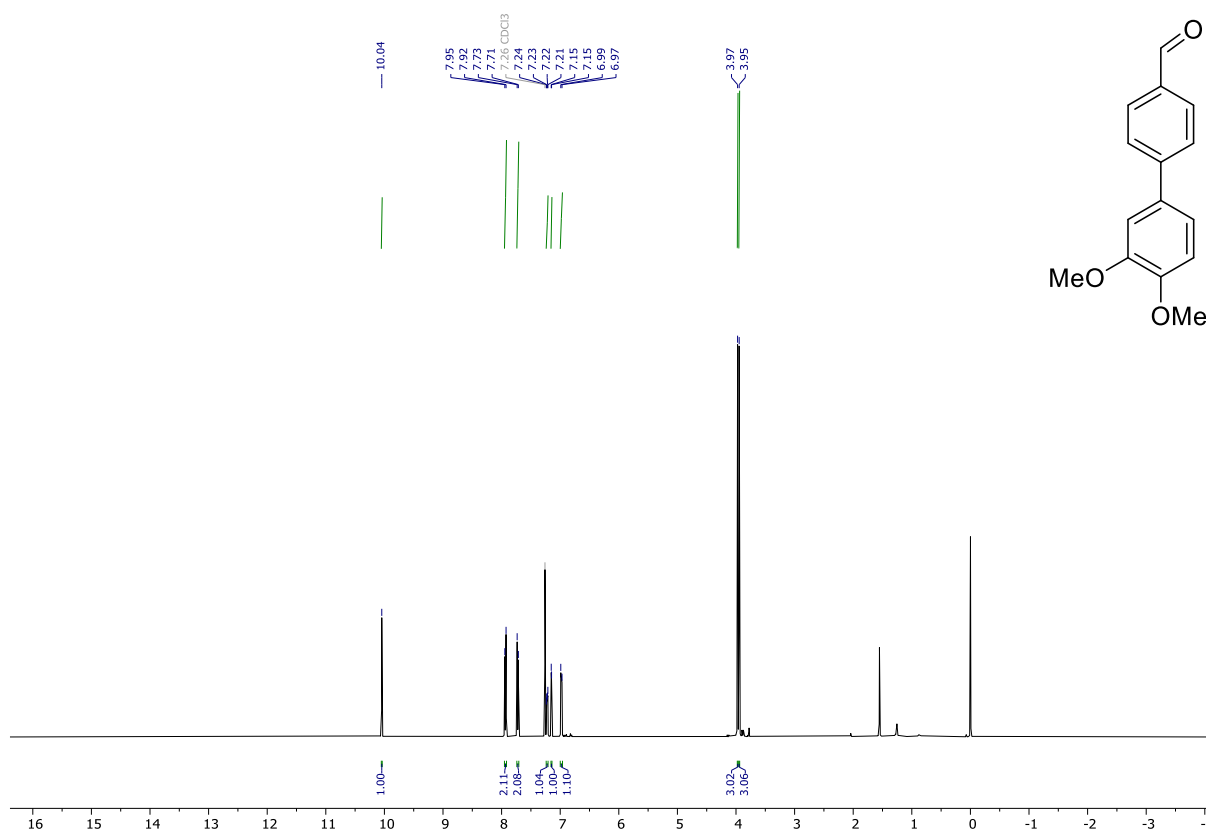

<sup>13</sup>C NMR (101 MHz, CDCl<sub>3</sub>): 2f

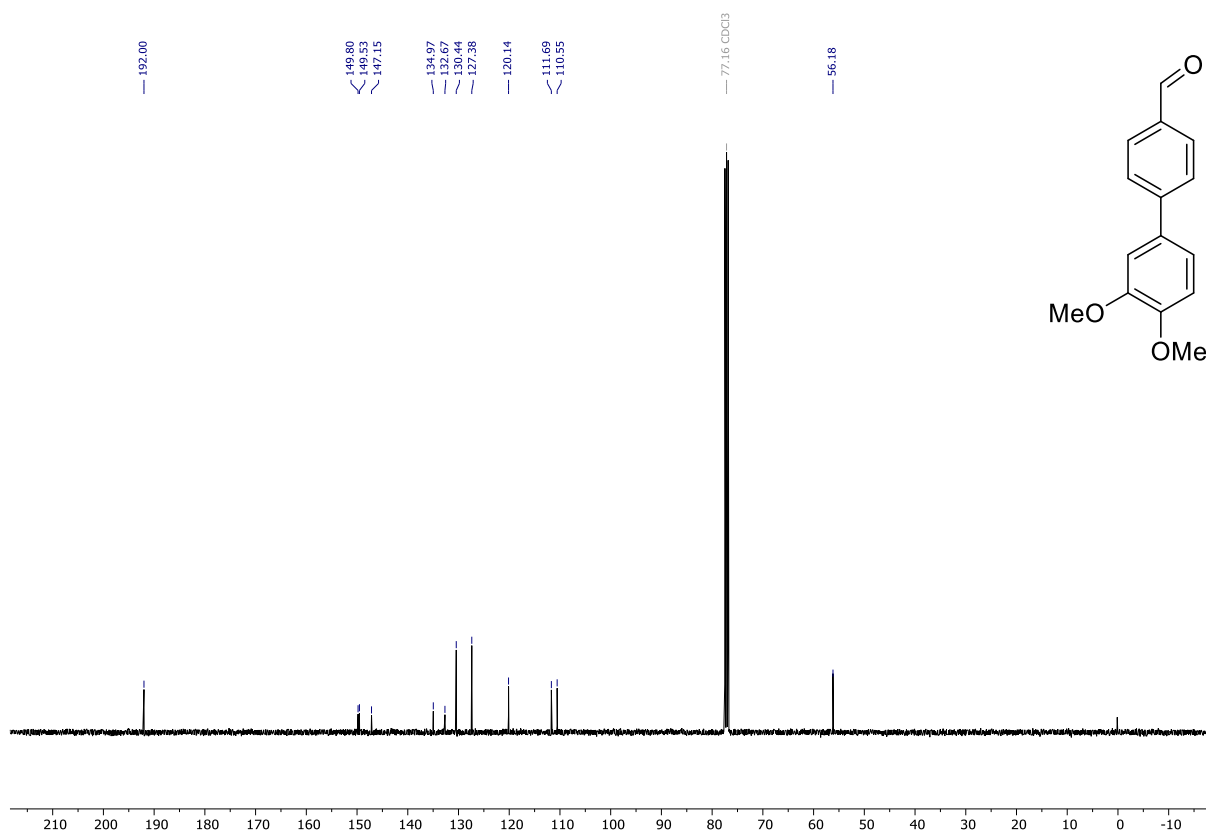

<sup>1</sup>H NMR (400 MHz, CDCl<sub>3</sub>): 2g

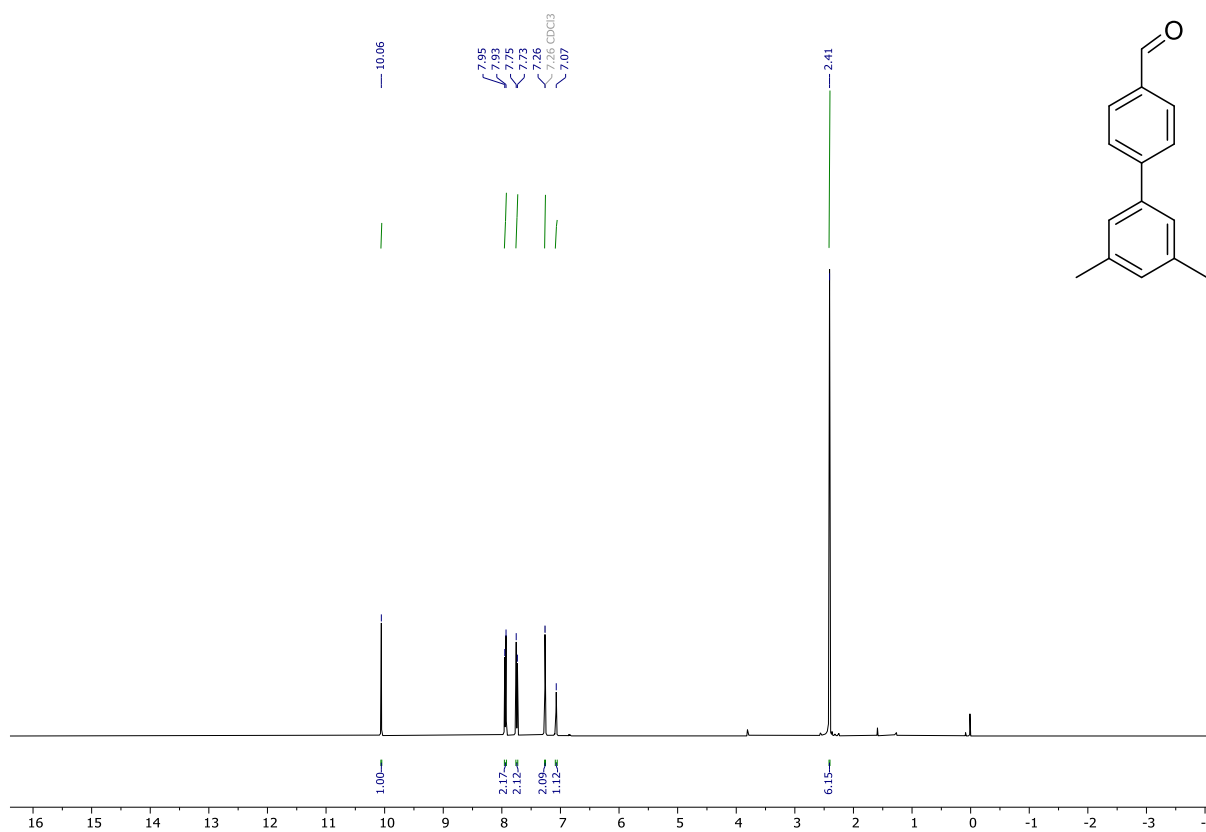

<sup>13</sup>C NMR (101 MHz, CDCl<sub>3</sub>): 2g

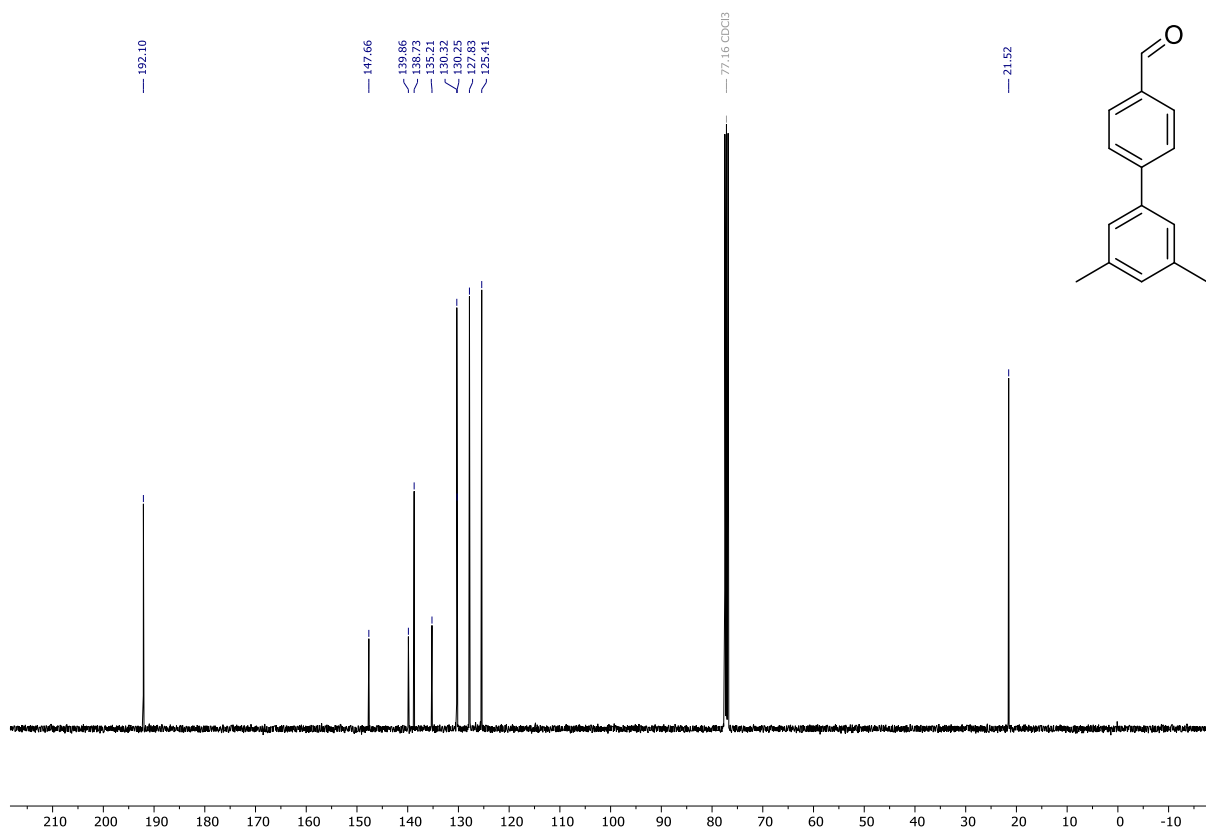

<sup>1</sup>H NMR (400 MHz, DMSO): reaction mixture 2h

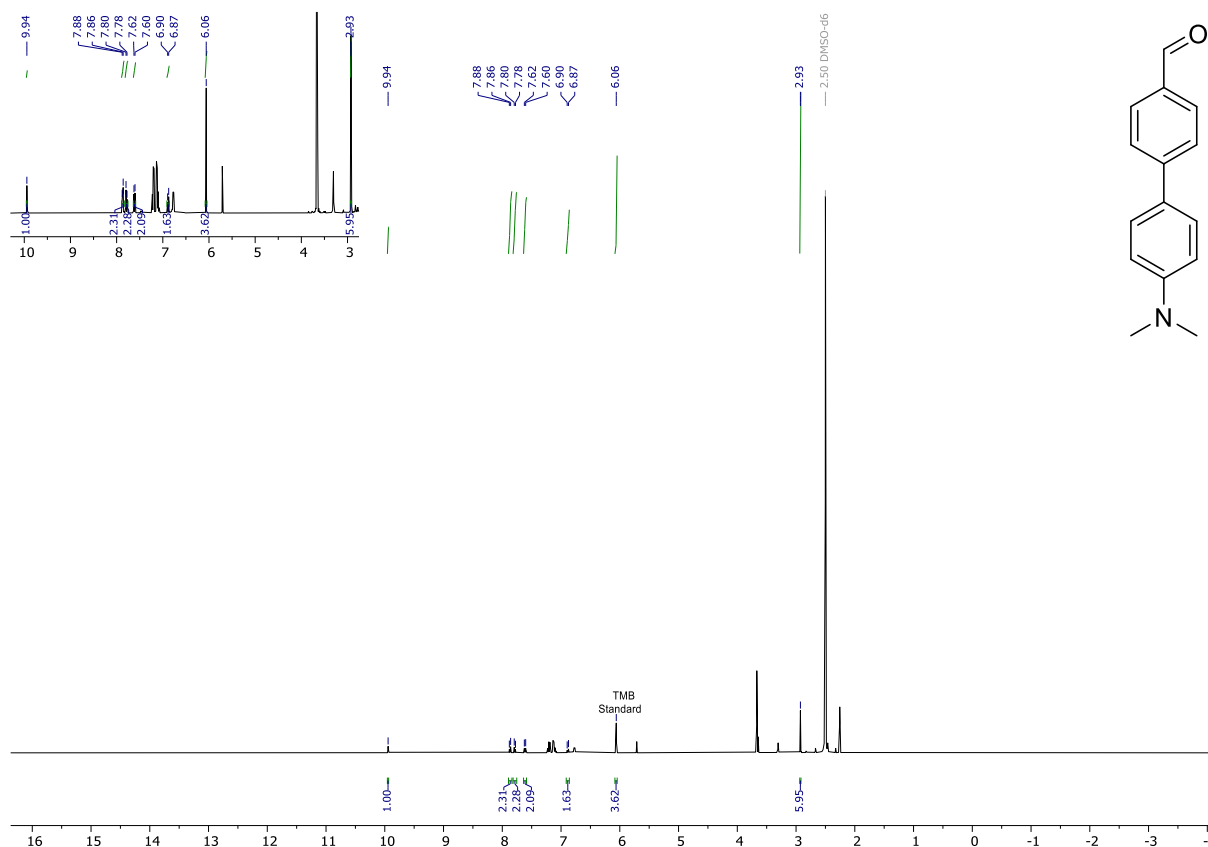

**<sup>1</sup>H NMR (400 MHz, DMSO): reaction mixture 2i**

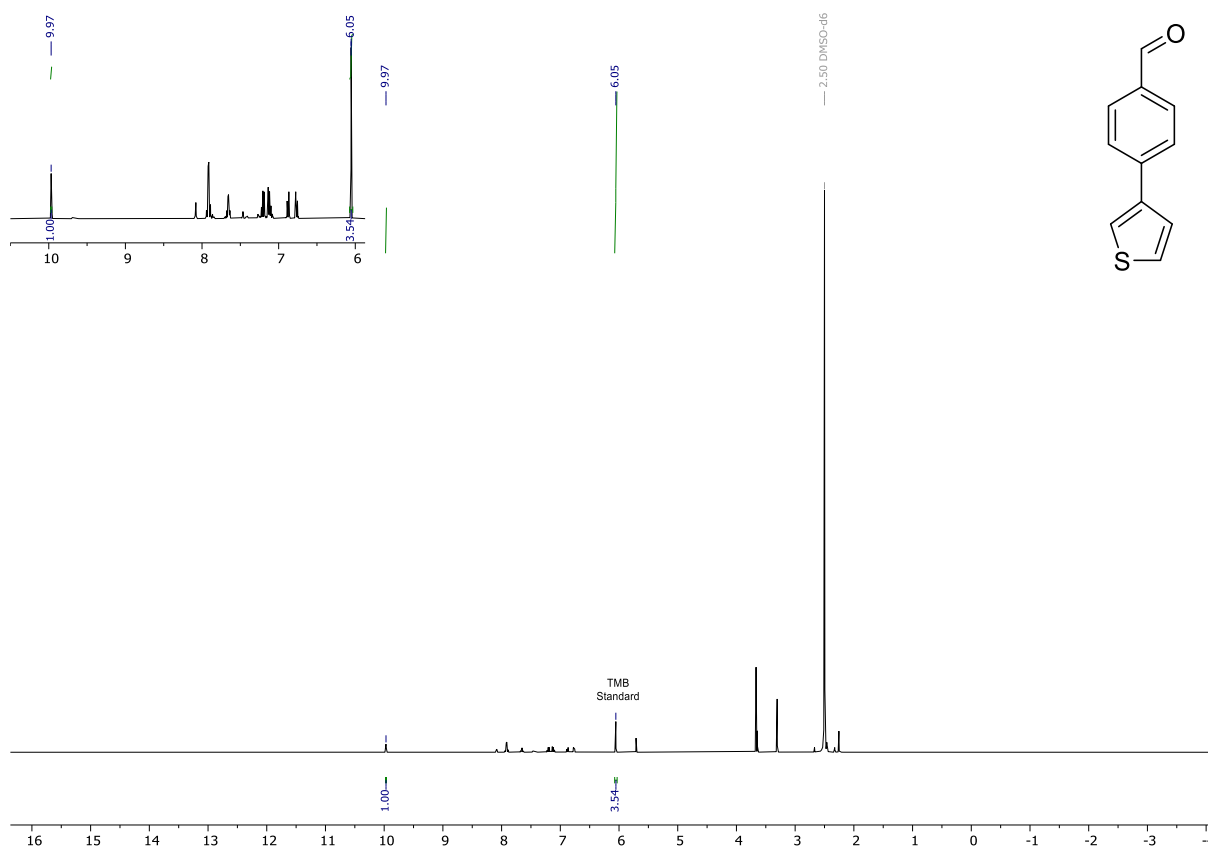

**<sup>1</sup>H NMR (400 MHz, CDCl<sub>3</sub>): reaction mixture SI21**

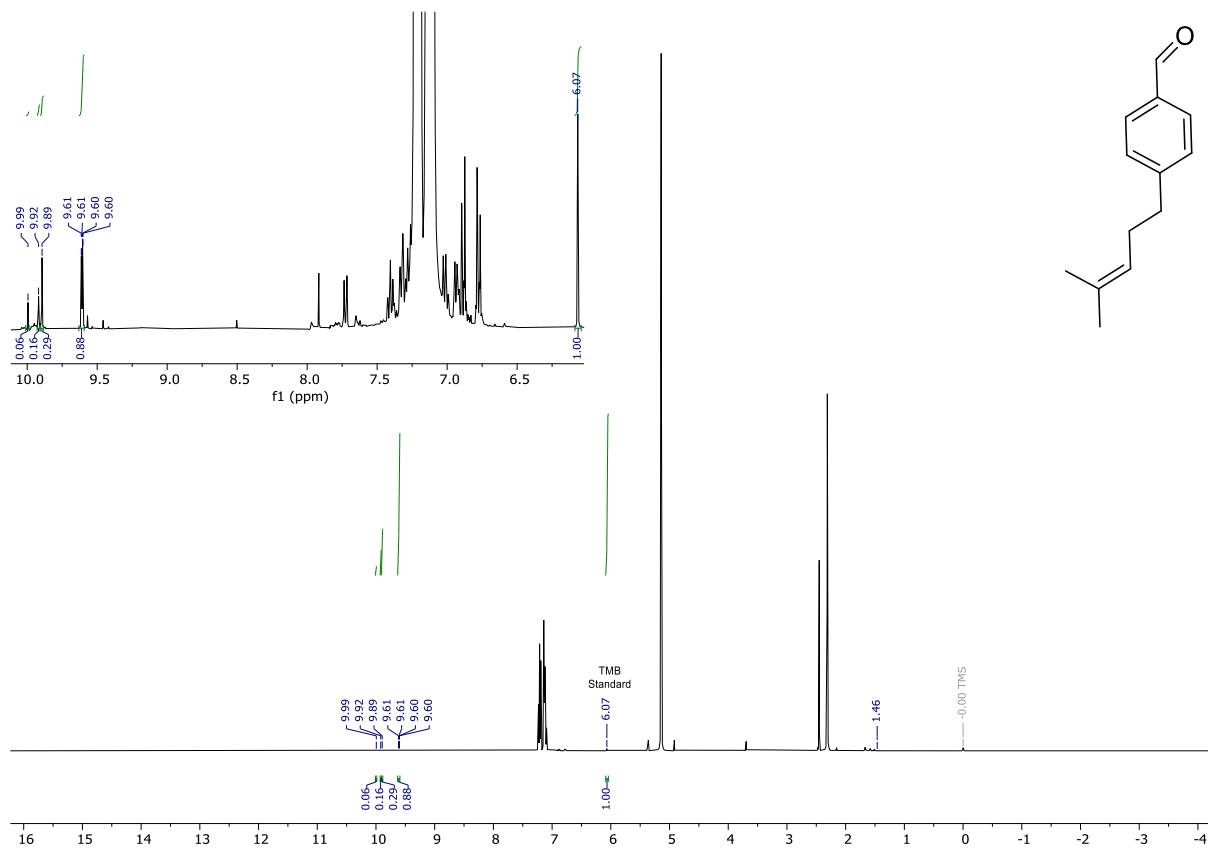

Supplement: d6cc00868b2.pdf [file d6cc00868b2.pdf]
